# Supplementary material for: A tailored polymeric cationic tag–anionic Pd(ii) complex as a catalyst for the low-leaching Heck–Mizoroki coupling in flow and in biomass-derived GVL
Source: Royal Society of Chemistry journal article supplement (doi:10.1039/c8gc03228a), 2018-12-21

## SUPPORTING INFORMATION

### **Tailored polymeric cationic tag-anionic Pd(II) complex as catalyst for the low-leaching Heck-Mizoroki coupling in flow and in biomass-derived GVL**

Hamed Mahmoudi,<sup>a,b‡</sup> Federica Valentini,<sup>a‡</sup> Francesco Ferlin,<sup>a</sup> Lucia Anna Bivona,<sup>c</sup> Ioannis Anastasiou,<sup>a</sup> Carmela Aprile,<sup>c</sup> Assunta Marrocchi,<sup>a</sup> and Luigi Vaccaro<sup>a\*</sup>

<sup>a</sup>Laboratory of Green S.O.C. – Dipartimento di Chimica, biologia e Biotecnologie, Università degli Studi di Perugia, Via Elce di Sotto 8, 06123 – Perugia – Italia; E-mail: [luigi.vaccaro@unipg.it](mailto:luigi.vaccaro@unipg.it); Web: [www.dcbb.unipg.it/greensoc](http://www.dcbb.unipg.it/greensoc)

<sup>b</sup>Chemistry Department, Sharif University of Technology, Tehran, P.O. Box 11155-3615, Iran

<sup>c</sup>Laboratory of Applied Material Chemistry (CMA), University of Namur, 61 rue de Bruxelles, 5000 Namur, Belgium.

‡ Both authors contributed equally to this work

## Experimental Section

General remarks. All chemicals were used as obtained from commercial sources without any further purification unless otherwise noted. 4-Vinylbenzylchloride (VBC) and styrene were extracted three times with a 5% w/w NaOH solution to remove the polymerization inhibitor (tert-butyl catechol). Dibenzoylperoxide was re-crystallized from methanol. GLC analyses were performed by using Hewlett-Packard HP 5890 SERIES II equipped with a capillary column DB-5MS (30 m, 0.32 mm), a FID detector and helium as gas carrier. GC-EIMS analyses were carried out by using a Hewlett-Packard HP 6890N Network GC system/5975 Mass Selective Detector equipped with an electron impact ionizer at 70 eV. NMR spectra in solution were recorded on a Bruker DRX-ADVANCE 400 MHz ( $^1\text{H}$  at 400 MHz and  $^{13}\text{C}$  at 100.6 MHz). Chemical shifts are reported in ppm and coupling constants in Hertz. Solid-state  $^{13}\text{C}$  CP-MAS NMR spectra of support were recorded on a Bruker 500 MHz spectrometer with samples packed in zirconia rotors spinning at different kHz. CHN analyses (EA) were conducted on Fisons EA 1108 elemental analyzer. Elemental analysis of palladium content was carried out using an Agilent 4210 MP-AES instrument. Melting points were measured on a Büchi 510 apparatus.

Flow procedures were performed using a Jasco PU-4180 pump, an Omnifit Glass Column as reservoir and Supelco HPLC Column Blank as base/catalyst column.

Characterization data and copies of the  $^1\text{H}$  and  $^{13}\text{C}$  NMR are reported below.

## Synthesis of catalyst 1

**Preparation of SP-Cl support 2.**<sup>1</sup> A three-neck cylinder-shaped glass vessel, equipped with a mechanical stirrer, a condenser, and a nitrogen inlet was charged with an aqueous NaCl (2 wt%, 2.4 g) solution containing acacia gum (4 wt%, 4.8g) (120 mL). After deoxygenation by purging with nitrogen, a mixture of styrene (5.62 g, 53.95 mmol), vinylbenzylchloride (1.48 g, 9.75 mmol), 1,4-bis (4-vinylphenoxy)benzene<sup>1</sup> (0.409 g, 1.3 mmol), chlorobenzene (8 mL), and dibenzoylperoxide (150 mg, 0.62 mmol, 2% wt/wt) was rapidly added to the solution. Next, this reaction mixture was kept under stirring at room temperature for an additional 30 min, then heated at 85 °C for 24 h. Subsequently, the reaction mixture was cooled at room temperature, and the polymer beads were isolated by filtration, washed with water (50 mL), then extracted by using water (100 mL), THF (100 mL), and n-hexane (100 mL) in a Soxhlet apparatus. Finally, the resin (1) was dried under vacuum for 15 h at room temperature (6.18 g, 1.96 mmol Cl/g – theoretical, 80% yield).

**Post polymerization functionalization of SP-Cl 2 with 3,3-bis(1H-imidazol-1-yl)propan-1-ol (3).**<sup>2</sup> A 25 mL three-neck round bottom flask equipped with a magnetic stirrer was charged with 3,3-bis(1H-imidazol-1-yl)propan-1-ol (3) (0.370 g, 2.5 mmol, 1.6 eq) in 10 mL of dry DMF under nitrogen. Then, 3.75 mmol of NaH (60% in mineral oil; 3eq, 0.23 g) were added. This mixture was left under stirring at r.t. for 30 min, then resin 2 (0.770 mg) was added and the mixture was heated to 60 °C. After 24h, the resulting resin 4 was filtered and washed with water and acetone and dried under vacuum (pale yellow solid). The bis-imidazole unit loading was determined to be 0.76 mmol/g by elemental analysis C: 78.11; H: 6.88, N: 4.27.

**Preparation of SP-supported imidazolium salt 5.**<sup>3</sup> In a 10 mL stainless steel vessel, resin 4 (0.9 g) was added to iodomethane (5 mL, 79.5 mol) and the reaction mixture was then kept under stirring at 90 °C. After 20 h, the mixture was filtered, and the residual solid was washed with methanol and acetone, then dried under vacuum. The SP-supported imidazolium salt 5 was obtained as a yellow solid. The bis-imidazolium moiety loading was determined to be 0.51 mmol/g by elemental analysis C: 71.47; H: 6.47, N: 2.83.

**Immobilization of [PdCl<sub>4</sub>]<sup>2-</sup>.**<sup>4</sup> A 50 mL round-bottom flask equipped with a magnetic stirrer was charged with PdCl<sub>2</sub> (0.074 g, 0.42 mmol) and NaCl (0.54 g, 9.24 mmol), in water (15 mL). The mixture was then heated at 80 °C under stirring for ~30 min, i.e. until the formation of Na<sub>2</sub>PdCl<sub>4</sub>. Next, the solution was cooled at r.t. and added dropwise to a suspension of 5 (0.6 g) in water (10 mL) under stirring. The suspension was kept under stirring at r.t. for 2 h, then filtered under reduced pressure, washed with water and methanol and dried under vacuum. The product (1) was obtained as a black powder. The loading of Pd was determined to be 3 wt% by MP-AES analysis.

### **Typical procedure for Heck-Mizoroki reaction in GVL under batch conditions (extraction work up).**

In a 4 mL screw-capped vial equipped with a magnetic stirrer, the aryl iodide 6 (1mmol), the alkene 7 or 9 (1.2 mmol), GVL (0.8 M, 1.25 mL), diethylaminomethyl-polystyrene (1.5 equiv, 0.47 g) and catalyst 1 (0.1 mol%, 4.6 mg) and were consecutively added, and the resulting mixture was left under stirring at 130 °C for the time required to complete conversion of the aryl iodide 6, monitored by GLC. After 2 h, the heterogeneous base and catalyst were filtered off, 3 mL of n-heptane were added and the organic phase was washed with water (3x2 mL). Then the organic phase was dried under vacuum, and compound 8 or 10 were isolated.

***Typical procedure for Heck-Mizoroki reaction in GVL under batch conditions (precipitation work up).***

In a 4 mL screw-capped vial equipped with a magnetic stirrer, the aryl iodide **6** (1mmol), the alkene **9** (1.2 mmol), GVL (0.8 M, 1.25 mL), diethylaminomethyl-polystyrene (1.5 equiv, 0.47 g) and catalyst **1** (0.1 mol%, 4.6 mg) and were consecutively added, and the resulting mixture was left under stirring at 130 °C for the time required to complete conversion of the aryl iodide **6**, monitored by GLC. After 2 h, the heterogeneous base and catalyst were filtered off and washed with ethylacetate (1mL), then this latter was distilled off and the residue was cooled down to 0°C and added with water (1 mL). The precipitate was filtered off and washed with 1 mL of cold water, then dried under vacuum to afford compound **10**.

***Regeneration procedure for PS-TEA (batch reaction).***

The catalyst-base system (474.6 mg) filtered from the reaction mixture was charged into a screw-capped vial equipped with a magnetic stirrer, and TEA (1.5 eq, 2.25 mmol, 314 µL) in 1 mL GVL was added. The mixture was kept under stirring for 30 min, at r.t. Next, the catalyst-base system was filtered off, washed with 1 mL of GVL, and dried under vacuum.

***Typical procedure for Heck-Mizoroki reaction in GVL under flow conditions***

A pre-mixed mixture of aryl iodide (1 mmol) and acrylate or styrene derivative (1.2 mmol) in GVL (0.8 M, 1.2 mL) was charged into a glass column functioning as a reservoir. Diethylaminomethyl-polystyrene (~3.2 mmol/g, 469 mg) and catalyst **1** (3 wt%, 4.6 mg, 0.1 mol%) were mixed and dispersed in 1 mm diameter solid glass beads and charged in a stainless steel HPLC column (15cm, 4mm I.D.); the equipment was connected, by using the appropriate valves, to a pump and installed into a thermostatted box. The reaction mixture was continuously pumped (flow rate 1.0 mLmin<sup>-1</sup>) through the base - catalyst column at 130 °C until complete conversion of reactants to product was achieved (the reaction was monitored by GLC). At this stage, the pump was left to run in order to recover the reaction mixture into the reservoir. To completely recover the product and clean the reactor, GVL (3 x 1.2 mL at a 1 mLmin<sup>-1</sup>) was cyclically pumped through the base - catalyst column for 15 min (each fraction) and then collected into the reservoir to isolate the product, after removal and recovery of the solvent (ca 98% of which was recovered) via distillation. A solution of TEA (0.2 mL in 2 mL of GVL) was cyclically pumped through the base/catalyst column (1 mLmin<sup>-1</sup>, 30 min) to regenerate the diethylaminomethyl-polystyrene. Finally, GVL (5 mL) was cyclically pumped through the base/catalyst column in two portions to remove residual TEA. After removal of TEA via vacuum distillation, GVL was distilled and recovered (98 %) as pure solvent, as confirmed by <sup>1</sup>HNMR analysis.

***Preparation of the samples for MP-AES analyses.***

The crude reaction mixture from Heck coupling, after separation of heterogeneous catalyst-base systems and evaporation under vacuum was dissolved in aqua regia and stirred for 1h at room temperature. Water was added to reach a final volume of 10 mL. If present, residual solid was filtered off and the sample was analyzed by MP-AES 4210 instrument.

**References.**

1. (a) A. Marrocchi, P. Adriaensens, E. Bartollini, B. Barkakaty, R. Carleer, J. Chen, D. K. Hensley, C. Petrucci, M. Tassi and L. Vaccaro, *Eur. Polym. J.*, **2015**, 73, 391-401, (b) M. Tassi,

- E. Bartollini, P. Adriaenssens, L. Bianchi, B. Barkakaty, R. Carleer, J. Chen, D. K. Hensley, A. Marrocchi and L. Vaccaro, *RSC Adv.*, **2015**, 5, 107200-107208.
2. V. Hornillos, J. Guerra, A. de Cozar, P. Prieto, S. Merino, M. A. Maestro, E. Diez-Barra, J. Tejeda, *Dalton Trans.* **2011**, 40, 4095-4103.
3. E. Mas-Marzá, M. Poyatos, M. Sanaú, E. Peris, *Organometallics* **2004**, 23, 323-325.
4. L. A. Bivona, F. Giacalone, L. Vaccaro, C. Aprile, M. Gruttadauria, *ChemCatChem* **2015**, 7, 2526-2533.

## Representative E-factor calculation.

### Batch reaction of iodobenzene (6a) with methylacrylate (7a):

E-factor = [0.208 g (6a) + 0.104 g (7a) + 1.312 g (GVL) + 0.469 g (PS-TEA) + 0.0046 g (catalyst 1) + 2.052 g (n-heptane) + 6.000 g (water) – 0.148 g (product)]/0.148 g (product) = **67.58**.

or (batch protocol envisaging GVL recovery):

E-factor = [0.208 g (6a) + 0.104 g (7a) + 1.312 g (GVL) + 0.228 g (TEA wash) + 1.05 g (GVL for PS-TEA regeneration) + 1.05 g (GVL wash) + 0.897 g (ethyl acetate) + 2.000 g (water) – 0.148 g (product) – 3.41 g (97% GVL recovered, regeneration/wash steps)]/0.148 g (product) = **22.24**.

**PS-TEA and catalyst 1 were not considered due to their complete recovery**

### Batch reaction of iodobenzene (6a) with butylacrylate (7b):

E-factor = [0.208 g (6a) + 0.157 g (7b) + 1.312 g (GVL) + 0.469 g (PS-TEA) + 0.0046 g (catalyst 1) + 2.052 g (n-Heptane) + 6.000 g (water) – 0.176 g (product)]/0.176 g (product) = **56.97**.

### Batch reaction of 4-methyl-iodobenzene (6b) with methylacrylate (7a):

E-factor = [0.220 g (6b) + 0.104 g (7a) + 1.312 g (GVL) + 0.469 g (PS-TEA) + 0.0046 g (catalyst 1) + 0.897 g (ethyl acetate) + 2.000 g (water) – 0.148 g (product)]/0.148 g (product) = **32.83**.

### Batch reaction of 4-methyl-iodobenzene (6b) with butylacrylate (7b):

E-factor = [0.220 g (6b) + 0.157 g (7b) + 1.312 g (GVL) + 0.469 g (PS-TEA) + 0.0046 g (catalyst 1) + 2.052 g (n-heptane) + 6.000 g (water) – 0.192 g (product)]/0.192 g (product) = **52.20**.

### Batch reaction of 4-methoxy-iodobenzene (6c) with methylacrylate (7a):

E-factor = [0.239 g (6c) + 0.104 g (7a) + 1.312 g (GVL) + 0.469 g (PS-TEA) + 0.0046 g (catalyst 1) + 0.897 g (ethyl acetate) + 2.000 g (water) – 0.170 g (product)]/0.170 g (product) = **28.56**.

### Batch reaction of 4-methoxy-iodobenzene (6c) with butylacrylate (7b):

E-factor = [0.239 g (6c) + 0.157 g (7b) + 1.312 g (GVL) + 0.469 g (PS-TEA) + 0.0046 g (catalyst 1) + 2.052 g (n-heptane) + 6.000 g (water) – 0.211 g (product)]/0.211 g (product) = **47.50**.

### Batch reaction of 4-iodoacetophenone (6d) with methylacrylate (7a):

E-factor = [0.251 g (6d) + 0.104 g (7a) + 1.312 g (GVL) + 0.469 g (PS-TEA) + 0.0046 g (catalyst 1) + 0.897 g (ethyl acetate) + 2.000 g (water) – 0.182 g (product)]/0.182 g (product) = **26.68**.

### Batch reaction of 4-iodoacetophenone (6d) with butylacrylate (7b):

E-factor = [0.251 g (6d) + 0.157 g (7b) + 1.312 g (GVL) + 0.469 g (PS-TEA) + 0.0046 g (catalyst 1) + 2.052 g (n-heptane) + 6.000 g (water) – 0.230 g (product)]/0.230 g (product) = **43.55**.

### Batch reaction of 2-iodothiophene (6e) with methylacrylate (7a):

E-factor = [0.214 g (**6e**) + 0.104 g (**7a**) + 1.312 g (GVL) + 0.469 g (PS-TEA) + 0.0046 g (catalyst 1) + 2.052 (n-heptane) + 6.000 g (water) – 0.133 g (**product**)]/0.133 g (**product**) = **75.36**.

or (**batch protocol envisaging GVL recovery**):

E-factor = [0.214 g (**6e**) + 0.104 g (**7a**) + 1.312 g (GVL) + 2.052 g (n-heptane) + 0.228 g (TEA wash) + 1.05 g (GVL for PS-TEA regeneration) + 1.05g (GVL wash) + 6.000g (water) – 0.133 g (**product**) – 3.41 g (97% GVL recovered, regeneration/wash steps)]/0.133 g (**product**) = **63.66**.

PS-TEA and catalyst 1 were not considered due to their complete recovery.

**Batch reaction of 2-iodothiophene (6e) with butylmetacrylate (7b):**

E-factor = [0.214 g (**6e**) + 0.157 g (**7b**) + 1.312 g (GVL) + 0.469 g (PS-TEA) + 0.0046 g (catalyst 1) + 2.052 (n-heptane) + 6.000 g (water) – 0.183 g (**product**)]/0.183 g (**product**) = **54.78**.

**Batch reaction of iodobenzene (6a) with styrene (9a):**

E-factor = [0.208 g (**6a**) + 0.128 g (**9a**) + 1.312 g (GVL) + 0.469 g (PS-TEA) + 0.0046 g (catalyst 1) + 0.897 g (Ethyl acetate) + 2.000 g (water) – 0.153 g (**product**)]/0.153 g (**product**) = **31.80**.

**Batch reaction of iodobenzene (6a) with 4-chlorostyrene (9b):**

E-factor = [0.208 g (**6a**) + 0.171 g (**9b**) + 1.312 g (GVL) + 0.469 g (PS-TEA) + 0.0046 g (catalyst 1) + 0.897 g (ethyl acetate) + 2.000 g (water) – 0.186 g (**product**)]/0.186 g (**product**) = **26.21**.

**Batch reaction of 4-methyl-iodobenzene (6b) with styrene (9a):**

E-factor = [0.220 g (**6b**) + 0.128 g (**9a**) + 1.312 g (GVL) + 0.469 g (PS-TEA) + 0.0046 g (catalyst 1) + 0.897 g (ethyl acetate) + 2.000 g (water) – 0.168 g (**product**)]/0.168 g (**product**) = **28.94**.

**Batch reaction of 4-methyl-iodobenzene (6b) with 4-chlorostyrene (9b):**

E-factor = [0.220 g (**6b**) + 0.171 g (**9b**) + 1.312 g (GVL) + 0.469 g (PS-TEA) + 0.0046 g (catalyst 1) + 0.897 g (ethyl acetate) + 2.000 g (water) – 0.188 g (**product**)]/0.188 g (**product**) = **25.99**.

**Batch reaction of 4-methoxy-iodobenzene (6c) with styrene (9a):**

E-factor = [0.239 g (**6c**) + 0.128 g (**9a**) + 1.312 g (GVL) + 0.469 g (PS-TEA) + 0.0046 g (catalyst 1) + 0.897 g (ethyl acetate) + 2.000 g (water) – 0.187 g (**product**)]/0.187 g (**product**) = **26.00**.

**Batch reaction of 4-methoxy-iodobenzene (6c) with 4-chlorostyrene (9b):**

E-factor = [0.239 g (**6c**) + 0.171 g (**9b**) + 1.312 g (GVL) + 0.469 g (PS-TEA) + 0.0046 g (catalyst 1) + 0.897 g (ethyl acetate) + 2.000 g (water) – 0.221 g (**product**)]/0.221 g (**product**) = **22.04**.

**Batch reaction of 4-iodo-acetophenone (6d) with styrene (9a):**

E-factor = [0.251 g (**6d**) + 0.128 g (**9a**) + 1.312 g (GVL) + 0.469 g (PS-TEA) + 0.0046 g (catalyst **1**) + 0.897 g (ethyl acetate) + 2.000 g (water) – 0.207 g (**product**)]/0.207 g (**product**) = **23.45**.

**Batch reaction of 4-iodo-acetophenone (6d) with 4-chlorostyrene (9b):**

E-factor = [0.251 g (**6d**) + 0.171 g (**9b**) + 1.312 g (GVL) + 0.469 g (PS-TEA) + 0.0046 g (catalyst **1**) + 0.897 g (ethyl acetate) + 2.000 g (water) – 0.229 g (**product**)]/0.229 g (**product**) = **21.29**.

or (batch protocol envisaging GVL recovery):

E-factor = [0.251 g (**6d**) + 0.171 g (**9b**) + 1.312 g (GVL) + 0.897 g (ethyl acetate) + 0.228 g (TEA wash) + 1.05 g (GVL for PS-TEA regeneration) + 1.05g (GVL wash) + 2.000g (water) – 0.229 g (**product**) – 3.41 g (97% GVL recovered, regeneration/wash steps)]/0.229 g (**product**) = **14.5**.

**PS-TEA and catalyst 1 were not considered due to their complete recovery**

**Batch reaction of 2-iodothiophene (6e) with styrene (9a):**

E-factor = [0.214 g (**6e**) + 0.128 g (**9a**) + 1.312 g (GVL) + 0.469 g (PS-TEA) + 0.0046 g (catalyst **1**) + 0.897 g (ethyl acetate) + 2.000 g (water) – 0.142 g (**product**)]/0.142 g (**product**) = **34.38**.

**Batch reaction of 2-iodothiophene (6e) with 4-chlorostyrene (9b):**

E-factor = [0.214 g (**6e**) + 0.171 g (**9b**) + 1.312 g (GVL) + 0.469 g (PS-TEA) + 0.0046 g (catalyst **1**) + 0.897 g (ethyl acetate) + 2.000 g (water) – 0.176 g (**product**)]/0.176 g (**product**) = **27.79**.

**Flow reaction of iodobenzene (6a) with methylacrylate (7a):**

E-factor = [0.204 g (**6a**) + 0.103 g (**7a**) + 11.8 g (GVL) + 0.151 g (TEA)] – [0.193 g (**product**) + 11.1 g (94% recovered medium)]/0.193 g (**product**) = **5**

Diethylaminomethyl-polystyrene (PS-TEA) and catalyst were not considered due to their complete recovery.

**Flow reaction of 4-iodoacetophenone (6d) with styrene (9a):**

E-factor = [0.246 g (**6d**) + 0.125 g (**9a**) + 11.8 g (GVL) + 0.151 g (TEA)] – [0.210 g (**product**) + 11.6 g (98% recovered medium)]/0.210 g (**product**) = **2.4**

Diethylaminomethyl-polystyrene (PS-TEA) and catalyst were not considered due to their complete recovery.

**Flow reaction to 2-iodothiophene (6e) with 4-chlorostyrene (9b):**

E-factor = [0.210 g (**6e**) + 0.166 g (**9b**) + 11.8 g (GVL) + 0.151 g (TEA)] – [0.146 g (**product**) + 11.6 g (98% recovered medium)]/0.146 g (**product**) = **3.9**

Diethylaminomethyl-polystyrene (PS-TEA) and catalyst were not considered due to their complete recovery.



**Table S1.** Heck reaction between aryl iodides **6a-e** and methyl acrylates **7a-b** or styrenes **9a-b** catalyzed by **1** in GVL at 130 °C<sup>a</sup>

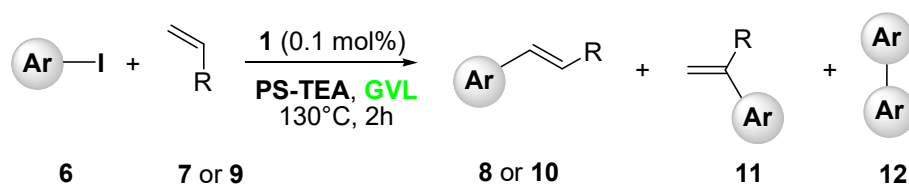

| entry | Ar                                                 | R                                  | product     | C(%) <sup>b</sup> | 8(or10):11:12 <sup>b</sup>     | E-factor <sup>c</sup> |
|-------|----------------------------------------------------|------------------------------------|-------------|-------------------|--------------------------------|-----------------------|
| 1     | C <sub>6</sub> H <sub>5</sub>                      | CO <sub>2</sub> Me                 | <b>8aa</b>  | >99               | 100:0:0 (100:0:0) <sup>c</sup> | 67.58 (22.24)         |
| 2     |                                                    | CO <sub>2</sub> Bu                 | <b>8ab</b>  | >99               | 100:0:0                        | 56.97                 |
| 3     |                                                    | C <sub>6</sub> H <sub>5</sub>      | <b>10aa</b> | 97                | 93:7:0                         | 31.80                 |
| 4     |                                                    | 4-Cl-C <sub>6</sub> H <sub>5</sub> | <b>10ab</b> | 97                | 94:6:0                         | 26.21                 |
| 5     | 4-CH <sub>3</sub> -C <sub>6</sub> H <sub>5</sub>   | CO <sub>2</sub> Me                 | <b>8ba</b>  | 96                | 100:0:0                        | 32.83                 |
| 6     |                                                    | CO <sub>2</sub> Bu                 | <b>8bb</b>  | >99               | 100:0:0                        | 52.20                 |
| 7     |                                                    | C <sub>6</sub> H <sub>5</sub>      | <b>10ba</b> | 97                | 92:8:0                         | 28.94                 |
| 8     |                                                    | 4-Cl-C <sub>6</sub> H <sub>5</sub> | <b>10bb</b> | 97                | 94:6:0                         | 25.99                 |
| 9     | 4-OCH <sub>3</sub> -C <sub>6</sub> H <sub>5</sub>  | CO <sub>2</sub> Me                 | <b>8ca</b>  | 96                | 100:0:0                        | 28.56                 |
| 10    |                                                    | CO <sub>2</sub> Bu                 | <b>8cb</b>  | >99               | 100:0:0                        | 47.50                 |
| 11    |                                                    | C <sub>6</sub> H <sub>5</sub>      | <b>10ca</b> | >99               | 90:10:0                        | 26.00                 |
| 12    |                                                    | 4-Cl-C <sub>6</sub> H <sub>5</sub> | <b>10cb</b> | >99               | 93:7:0                         | 22.04                 |
| 13    | 4-COCH <sub>3</sub> -C <sub>6</sub> H <sub>5</sub> | CO <sub>2</sub> Me                 | <b>8da</b>  | >99               | 100:0:0                        | 26.68                 |
| 14    |                                                    | CO <sub>2</sub> Bu                 | <b>8db</b>  | 99                | 100:0:0                        | 43.55                 |
| 15    |                                                    | C <sub>6</sub> H <sub>5</sub>      | <b>10da</b> | >99               | 94:6:0 (100:0:0) <sup>c</sup>  | 23.45                 |
| 16    |                                                    | 4-Cl-C <sub>6</sub> H <sub>5</sub> | <b>10db</b> | >99               | 95:5:0                         | 21.29 (14.50)         |
| 17    | 2-iodothiophene                                    | CO <sub>2</sub> Me                 | <b>8ea</b>  | >99               | 96:0:4                         | 75.36 (63.66)         |
| 18    |                                                    | CO <sub>2</sub> Bu                 | <b>8eb</b>  | >99               | 97:0:3                         | 54.78                 |
| 19    |                                                    | C <sub>6</sub> H <sub>5</sub>      | <b>10ea</b> | 93                | 87:9:4                         | 34.38                 |
| 20    |                                                    | 4-Cl-C <sub>6</sub> H <sub>5</sub> | <b>10eb</b> | 98                | 94:4:2 (93:4:3) <sup>c</sup>   | 27.79                 |

<sup>a</sup>Reaction conditions: aryl iodides **6** (1 mmol), acrylates **7** or styrenes **9** (1.2 mmol), base (1.5 mmol), GVL (1.25 mL), 130 °C, 2 h; <sup>b</sup>Conversion of **6** to **8** or **10** and **8** (or **10**)/**11**/**12** ratio are measured by GLC analyses; <sup>c</sup>Values for batch protocols envisaging GVL recovery in parenthesis.

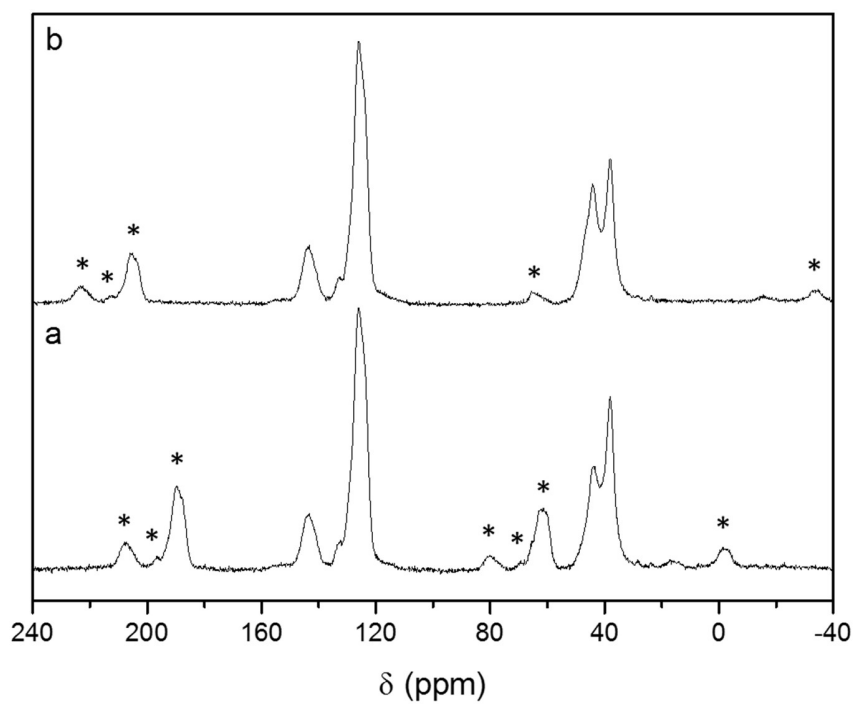

**Figure S1** (a)  $^{13}\text{C}$  CP-MAS of **2** at 8KHz (b)  $^{13}\text{C}$  CP\_MAS of **2** at 10 KHz (\*) sidebands

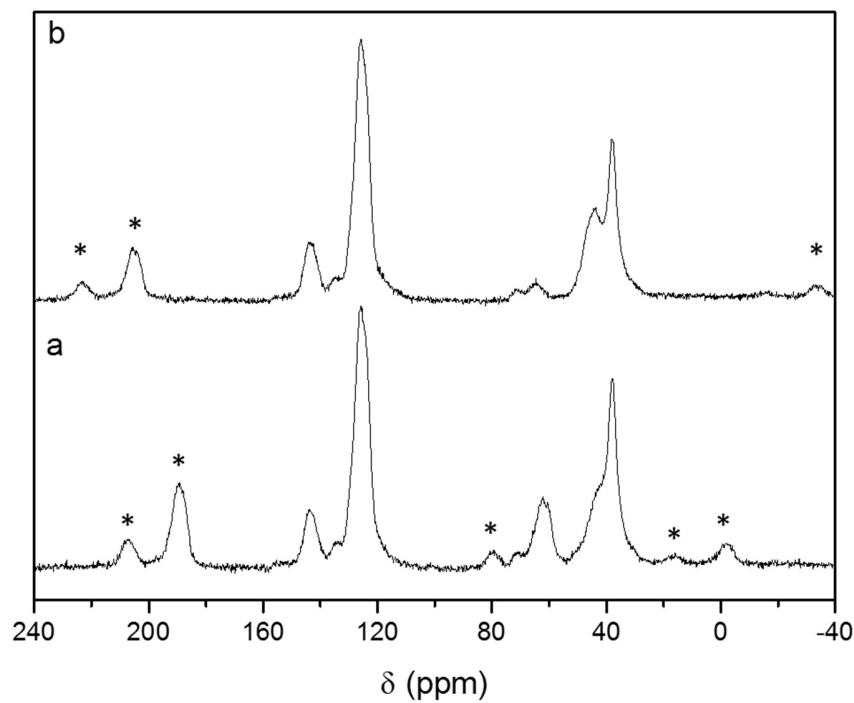

**Figure S2:** (a)  $^{13}\text{C}$  CP-MAS of **5** at 8KHz (b)  $^{13}\text{C}$  CP-MAS of **5** at 10KHz (\*) sidebands

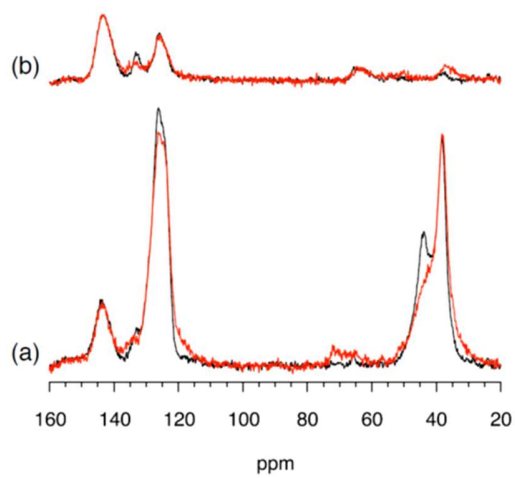

**Figure S3:** (a)  $^{13}\text{C}$  CP-TOSS of 2 (black line) and 5 (red line). (b)  $^{13}\text{C}$  CP-NQS of 2 (black line) and 5 (red line).

## Characterization data

|                                                                                                                                                                                                                                                                                                                                                                                                            |                                                                                                        |       |       |            |
|------------------------------------------------------------------------------------------------------------------------------------------------------------------------------------------------------------------------------------------------------------------------------------------------------------------------------------------------------------------------------------------------------------|--------------------------------------------------------------------------------------------------------|-------|-------|------------|
| Chem. Name                                                                                                                                                                                                                                                                                                                                                                                                 | Methyl 3,3-bis(1H-imidazol-1-yl)propanoate                                                             |       |       |            |
| Lit. Ref.                                                                                                                                                                                                                                                                                                                                                                                                  | V. Kozell, F. Rahmani, O. Piermatti, D. Lanari, L. Vaccaro, <i>Mol. Cat.</i> <b>2018</b> , 455,188–191 |       |       |            |
| <div>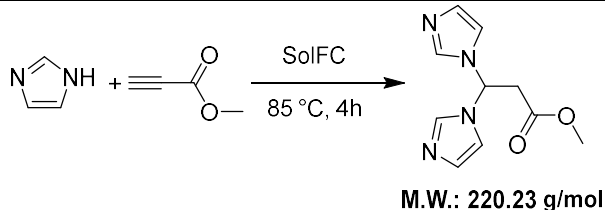</div> <p style="text-align: center;">M.W.: 220.23 g/mol</p>                                                                                                                                                                                                                                                        |                                                                                                        |       |       |            |
| METHOD:                                                                                                                                                                                                                                                                                                                                                                                                    |                                                                                                        |       |       |            |
| To a 12 mL screw-capped vial equipped with a magnetic stirrer, 1H-imidazole (110.2 mmol, 7.5 g) and methyl propiolate (28.1 mmol, 2.5mL) were consequently added. The mixture was left under stirring at 85°C. After 2.5 h, the mixture was washed several times with diethyl ether and acetone to afford pure methyl 3,3-bis(1H-imidazol-1-yl)propanoate as a white solid (5.13 g, 23.3 mmol, 83% yield). |                                                                                                        |       |       |            |
| Mol Formula                                                                                                                                                                                                                                                                                                                                                                                                | C <sub>10</sub> H <sub>12</sub> N <sub>4</sub> O <sub>2</sub>                                          |       | m.p.  | 138-140 °C |
| Elemental Analysis: Calc.: C: 54.54; H: 5.49; N: 25.44 found: C: 54.49; H: 5.51; N:25.47.                                                                                                                                                                                                                                                                                                                  |                                                                                                        |       |       |            |
| <sup>1</sup> H NMR<br>400 MHz<br>CDCl <sub>3</sub>                                                                                                                                                                                                                                                                                                                                                         | δ value                                                                                                | No. H | Mult. | j value/Hz |
|                                                                                                                                                                                                                                                                                                                                                                                                            | 7.68                                                                                                   | 2     | s     |            |
|                                                                                                                                                                                                                                                                                                                                                                                                            | 7.11                                                                                                   | 2     | s     |            |
|                                                                                                                                                                                                                                                                                                                                                                                                            | 6.99                                                                                                   | 2     | s     |            |
|                                                                                                                                                                                                                                                                                                                                                                                                            | 6.70                                                                                                   | 1     | t     | 7.2        |
|                                                                                                                                                                                                                                                                                                                                                                                                            | 3.70                                                                                                   | 3     | s     |            |
|                                                                                                                                                                                                                                                                                                                                                                                                            | 3.43                                                                                                   | 2     | d     | 7.2        |
| <sup>13</sup> C NMR (100.6 MHz, CDCl <sub>3</sub> ) δ : 168.0, 135.8, 131.2, 116.6, 64.6, 53.0, 40.2.                                                                                                                                                                                                                                                                                                      |                                                                                                        |       |       |            |
| GC-EIMS (m/z, %): 220 (M <sup>+</sup> , 27), 153 (100), 147 (18), 111 (81) 67 (17) 59 (24).                                                                                                                                                                                                                                                                                                                |                                                                                                        |       |       |            |

|                                                                                                                                                                                                                                                                                                                                                                                                                                                                                                                                                                                                                                                                                                                                                                               |                                                                                                                                                                 |       |            |            |
|-------------------------------------------------------------------------------------------------------------------------------------------------------------------------------------------------------------------------------------------------------------------------------------------------------------------------------------------------------------------------------------------------------------------------------------------------------------------------------------------------------------------------------------------------------------------------------------------------------------------------------------------------------------------------------------------------------------------------------------------------------------------------------|-----------------------------------------------------------------------------------------------------------------------------------------------------------------|-------|------------|------------|
| Chem. Name                                                                                                                                                                                                                                                                                                                                                                                                                                                                                                                                                                                                                                                                                                                                                                    | 3,3-bis(1H-imidazol-1-yl)propan-1-ol (3)                                                                                                                        |       |            |            |
| Lit. Ref.                                                                                                                                                                                                                                                                                                                                                                                                                                                                                                                                                                                                                                                                                                                                                                     | E. Díez-Barra, J. Guerra, V. Hornillos, S. Merino, J. Rodríguez-López, P. Sánchez-Verdú, J. Tejeda and J. Tolosa, <i>Arkivoc</i> , <b>2005</b> , 2005, 159-164. |       |            |            |
| <div>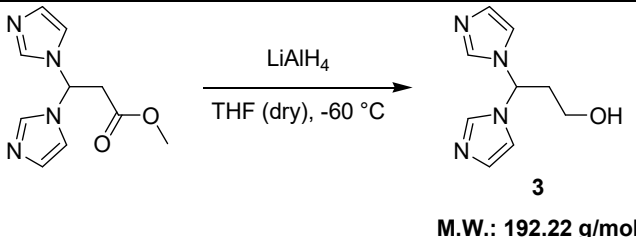</div>                                                                                                                                                                                                                                                                                                                                                                                                                                                                                                                                                                                                                                                                                 |                                                                                                                                                                 |       |            |            |
| METHOD:                                                                                                                                                                                                                                                                                                                                                                                                                                                                                                                                                                                                                                                                                                                                                                       |                                                                                                                                                                 |       |            |            |
| A 250 mL three-neck round bottom flask equipped with a magnetic stirrer was charged with LiAlH <sub>4</sub> (13.6 mmol, 0.534 g) in 20 mL of dry THF under nitrogen atmosphere. The mixture was cooled down to 0°C and methyl 3,3-bis(1H-imidazol-1-yl)propanoate (4.5 mmol, 1.0 g) in 100 mL of dry THF was added dropwise over 15 min. The mixture was left under stirring at room temperature for 3 h and the excess of LiAlH <sub>4</sub> was neutralized by the dropwise addition of 1 mL water. The mixture was filtrated and the remaining solid washed with warm THF (3 x 50 mL). The solvent was removed under vacuum and the residue was washed with acetone, affording 3,3-bis(1H-imidazol-1-yl)propan-1-ol (3) as a white solid (0.623 g, 3.2 mmol, 71.4% yield). |                                                                                                                                                                 |       |            |            |
| Mol Formula                                                                                                                                                                                                                                                                                                                                                                                                                                                                                                                                                                                                                                                                                                                                                                   | C <sub>9</sub> H <sub>12</sub> N <sub>4</sub> O                                                                                                                 | m.p.  | 148-150 °C |            |
| Elemental Analysis: Calc.: C: 56.24; H: 6.29; N: 29.15 found: C: 56.28; H: 6.28; N:29.21.                                                                                                                                                                                                                                                                                                                                                                                                                                                                                                                                                                                                                                                                                     |                                                                                                                                                                 |       |            |            |
| <sup>1</sup> H NMR<br>400 MHz<br>CDCl <sub>3</sub>                                                                                                                                                                                                                                                                                                                                                                                                                                                                                                                                                                                                                                                                                                                            | δ value                                                                                                                                                         | No. H | Mult.      | j value/Hz |
|                                                                                                                                                                                                                                                                                                                                                                                                                                                                                                                                                                                                                                                                                                                                                                               | 7.68                                                                                                                                                            | 2     | s          |            |
|                                                                                                                                                                                                                                                                                                                                                                                                                                                                                                                                                                                                                                                                                                                                                                               | 7.12                                                                                                                                                            | 2     | s          |            |
|                                                                                                                                                                                                                                                                                                                                                                                                                                                                                                                                                                                                                                                                                                                                                                               | 7.01                                                                                                                                                            | 2     | s          |            |
|                                                                                                                                                                                                                                                                                                                                                                                                                                                                                                                                                                                                                                                                                                                                                                               | 6.52                                                                                                                                                            | 1     | t          | 7.4        |
|                                                                                                                                                                                                                                                                                                                                                                                                                                                                                                                                                                                                                                                                                                                                                                               | 3.60                                                                                                                                                            | 2     | t          | 5.6        |
|                                                                                                                                                                                                                                                                                                                                                                                                                                                                                                                                                                                                                                                                                                                                                                               | 2.60                                                                                                                                                            | 2     | m          |            |
|                                                                                                                                                                                                                                                                                                                                                                                                                                                                                                                                                                                                                                                                                                                                                                               | 1.25                                                                                                                                                            | 1     | s          |            |
| <sup>13</sup> C NMR (100.6 MHz, CDCl <sub>3</sub> ) δ : 136.0, 130.9, 116.6, 64.9, 57.0, 36.9.                                                                                                                                                                                                                                                                                                                                                                                                                                                                                                                                                                                                                                                                                |                                                                                                                                                                 |       |            |            |
| GC-EIMS (m/z, %): 192 (M <sup>+</sup> , 10) , 125 (64), 95 (100), 68 (16).                                                                                                                                                                                                                                                                                                                                                                                                                                                                                                                                                                                                                                                                                                    |                                                                                                                                                                 |       |            |            |

|                                                                                                                                                                                                                                                                                                                                                                                                                                                                                                                                                                                                             |                                                                                                                    |       |          |            |
|-------------------------------------------------------------------------------------------------------------------------------------------------------------------------------------------------------------------------------------------------------------------------------------------------------------------------------------------------------------------------------------------------------------------------------------------------------------------------------------------------------------------------------------------------------------------------------------------------------------|--------------------------------------------------------------------------------------------------------------------|-------|----------|------------|
| Chem. Name                                                                                                                                                                                                                                                                                                                                                                                                                                                                                                                                                                                                  | Methyl cinnamate (8aa)                                                                                             |       |          |            |
| Lit. Ref.                                                                                                                                                                                                                                                                                                                                                                                                                                                                                                                                                                                                   | Z. Zhang, Z. Zha, C. Gan, C. Pan, Y. Zhou, Z. Wang, M-M. Zhou, <i>J. Org. Chem.</i> , <b>2006</b> , 71, 4339-4342. |       |          |            |
| <div><div><div><p><b>6a</b>                      <b>7a</b>                      <b>8aa</b></p><p>M.W.: 162.19 g/mol</p></div></div></div>                                                                                                                                                                                                                                                                                                                                                                                                                                                                   |                                                                                                                    |       |          |            |
| METHOD:                                                                                                                                                                                                                                                                                                                                                                                                                                                                                                                                                                                                     |                                                                                                                    |       |          |            |
| In a 4 mL screw-capped vial equipped with a magnetic stirrer, catalyst <b>1</b> (2.3 wt%, 0.0046 g, 0.1 mol%), PS-TEA (~3.2 mmol/g, 0.469 g, 1.5 eq.), GVL (0.8 M, 1.25 mL), iodobenzene ( <b>6a</b> ) (0.208 g, 114 $\mu$ L, 1 mmol), and methyl acrylate ( <b>7a</b> ) (0.104 g, 110 $\mu$ L, 1.2 mmol) were consecutively added and the resulting mixture was left under stirring at 130 °C. After 2 hours the catalyst and base were filtered off. The GVL was removed by using extraction work up method. Methyl cinnamate ( <b>8aa</b> ) was obtained as a white solid (0.148 g, 91% isolated yield). |                                                                                                                    |       |          |            |
| Mol Formula                                                                                                                                                                                                                                                                                                                                                                                                                                                                                                                                                                                                 | C <sub>10</sub> H <sub>10</sub> O <sub>2</sub>                                                                     | m.p.  | 36-38°C  |            |
| Elemental Analysis: Calc.: C: 74.06; H: 6.22; found: C: 74.08; H: 6.23.                                                                                                                                                                                                                                                                                                                                                                                                                                                                                                                                     |                                                                                                                    |       |          |            |
| <sup>1</sup> H NMR<br>400 MHz<br>CDCl <sub>3</sub>                                                                                                                                                                                                                                                                                                                                                                                                                                                                                                                                                          | $\delta$ value                                                                                                     | No. H | Mult.    | j value/Hz |
|                                                                                                                                                                                                                                                                                                                                                                                                                                                                                                                                                                                                             | 7.70                                                                                                               | 1     | <i>d</i> | 16.0       |
|                                                                                                                                                                                                                                                                                                                                                                                                                                                                                                                                                                                                             | 7.51 – 7.54                                                                                                        | 2     | <i>m</i> |            |
|                                                                                                                                                                                                                                                                                                                                                                                                                                                                                                                                                                                                             | 7.37 – 7.40                                                                                                        | 3     | <i>m</i> |            |
|                                                                                                                                                                                                                                                                                                                                                                                                                                                                                                                                                                                                             | 6.45                                                                                                               | 1     | <i>d</i> | 16.0       |
|                                                                                                                                                                                                                                                                                                                                                                                                                                                                                                                                                                                                             | 3.81                                                                                                               | 3     | <i>s</i> |            |
| <sup>13</sup> C NMR (100.6 MHz, CDCl <sub>3</sub> ) $\delta$ : 167.6, 145.0, 134.5, 130.4, 129.0, 128.2, 117.9, 51.8.                                                                                                                                                                                                                                                                                                                                                                                                                                                                                       |                                                                                                                    |       |          |            |
| GC-EIMS (m/z, %): 162 (M <sup>+</sup> , 50), 161 (25), 131 (100), 103 (71), 102 (25), 77(39), 51 (22).                                                                                                                                                                                                                                                                                                                                                                                                                                                                                                      |                                                                                                                    |       |          |            |

|                                                                                                                                                                                                                                                                                                                                                                                                                                                                                                                                                                                                                                              |                                                                                               |       |          |            |
|----------------------------------------------------------------------------------------------------------------------------------------------------------------------------------------------------------------------------------------------------------------------------------------------------------------------------------------------------------------------------------------------------------------------------------------------------------------------------------------------------------------------------------------------------------------------------------------------------------------------------------------------|-----------------------------------------------------------------------------------------------|-------|----------|------------|
| Chem. Name                                                                                                                                                                                                                                                                                                                                                                                                                                                                                                                                                                                                                                   | Butyl cinnamate (8ab)                                                                         |       |          |            |
| Lit. Ref.                                                                                                                                                                                                                                                                                                                                                                                                                                                                                                                                                                                                                                    | N. Iranpoor, H. Firouzabadi, R. Azadi, <i>Eur. J. Org. Chem.</i> <b>2007</b> , 13, 2197-2201. |       |          |            |
| <div><div><div><p><b>6a</b> + <b>7b</b> <math>\xrightarrow[\text{GVL 0.8M, 130 } ^\circ\text{C, 2h}]{\text{1 (0.1 mol \%), PS-TEA (1.5 eq)}}</math> <b>8ab</b></p><p><b>M.W.: 204.27 g/mol</b></p></div></div></div>                                                                                                                                                                                                                                                                                                                                                                                                                         |                                                                                               |       |          |            |
| METHOD:                                                                                                                                                                                                                                                                                                                                                                                                                                                                                                                                                                                                                                      |                                                                                               |       |          |            |
| In a 4 mL screw-capped vial equipped with a magnetic stirrer, catalyst <b>1</b> (2.3 wt%, 0.0046 g, 0.1 mol%), PS-TEA (~3.2 mmol/g, 0.469 g, 1.5 equiv), GVL (0.8 M, 1.25 mL), iodobenzene ( <b>6a</b> ) (0.208 g, 114 $\mu\text{L}$ , 1 mmol), and butyl acrylate ( <b>7b</b> ) (0.157 g, 174 $\mu\text{L}$ , 1.2 mmol) were consecutively added and the resulting mixture was left under stirring at 130 $^\circ\text{C}$ . After 2 hours the catalyst and base were filtered off. The GVL was removed by using extraction work up method. Butyl cinnamate ( <b>8ab</b> ) was obtained as a pale yellow oil (0.176 g, 86% isolated yield). |                                                                                               |       |          |            |
| Mol Formula                                                                                                                                                                                                                                                                                                                                                                                                                                                                                                                                                                                                                                  | C <sub>13</sub> H <sub>16</sub> O <sub>2</sub>                                                | m.p.  |          |            |
| Elemental Analysis: Calc.: C: 76.44; H: 7.90; found: C: 76.45; H: 7.92.                                                                                                                                                                                                                                                                                                                                                                                                                                                                                                                                                                      |                                                                                               |       |          |            |
| <sup>1</sup> H NMR<br>400 MHz<br>CDCl <sub>3</sub>                                                                                                                                                                                                                                                                                                                                                                                                                                                                                                                                                                                           | $\delta$ value                                                                                | No. H | Mult.    | j value/Hz |
|                                                                                                                                                                                                                                                                                                                                                                                                                                                                                                                                                                                                                                              | 7.68                                                                                          | 1     | <i>d</i> | 16.0       |
|                                                                                                                                                                                                                                                                                                                                                                                                                                                                                                                                                                                                                                              | 7.51 – 7.55                                                                                   | 2     | <i>m</i> |            |
|                                                                                                                                                                                                                                                                                                                                                                                                                                                                                                                                                                                                                                              | 7.37 – 7.40                                                                                   | 3     | <i>m</i> |            |
|                                                                                                                                                                                                                                                                                                                                                                                                                                                                                                                                                                                                                                              | 6.44                                                                                          | 1     | <i>d</i> | 16.0       |
|                                                                                                                                                                                                                                                                                                                                                                                                                                                                                                                                                                                                                                              | 4.21                                                                                          | 2     | <i>t</i> | 6.8        |
|                                                                                                                                                                                                                                                                                                                                                                                                                                                                                                                                                                                                                                              | 1.65 – 1.73                                                                                   | 2     | <i>m</i> |            |
|                                                                                                                                                                                                                                                                                                                                                                                                                                                                                                                                                                                                                                              | 1.41 – 1.49                                                                                   | 2     | <i>m</i> |            |
|                                                                                                                                                                                                                                                                                                                                                                                                                                                                                                                                                                                                                                              | 0.97                                                                                          | 3     | <i>t</i> | 8          |
| <sup>13</sup> C NMR (100.6 MHz, CDCl <sub>3</sub> ) $\delta$ : 167.3, 144.7, 134.6, 130.3, 129.0, 128.2, 118.4, 64.6, 30.9, 19.4, 13.9.                                                                                                                                                                                                                                                                                                                                                                                                                                                                                                      |                                                                                               |       |          |            |
| GC-EIMS (m/z, %): 204 (M <sup>+</sup> , 35), 148 (87), 147 (80), 132 (17), 131 (100), 104 (16), 103 (81), 102 (20), 77 (64), 51 (20).                                                                                                                                                                                                                                                                                                                                                                                                                                                                                                        |                                                                                               |       |          |            |

|                                                                                                                                                                                                                                                                                                                                                                                                                                                                                                                                                                                                                                                    |                                                                   |       |                  |            |
|----------------------------------------------------------------------------------------------------------------------------------------------------------------------------------------------------------------------------------------------------------------------------------------------------------------------------------------------------------------------------------------------------------------------------------------------------------------------------------------------------------------------------------------------------------------------------------------------------------------------------------------------------|-------------------------------------------------------------------|-------|------------------|------------|
| Chem. Name                                                                                                                                                                                                                                                                                                                                                                                                                                                                                                                                                                                                                                         | Methyl (E)-3-(p-tolyl)acrylate (8ba)                              |       |                  |            |
| Lit. Ref.                                                                                                                                                                                                                                                                                                                                                                                                                                                                                                                                                                                                                                          | K. Mori, <i>Tetrahedron: Asymmetry</i> <b>2005</b> , 16, 685-692. |       |                  |            |
| <div><div><div>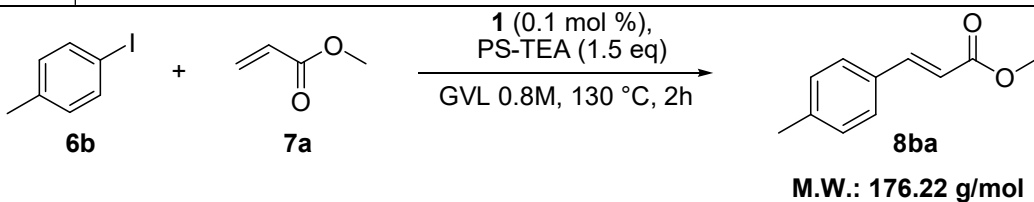</div><div><p><b>6b</b> + <b>7a</b> <math>\xrightarrow[\text{GVL 0.8M, 130 } ^\circ\text{C, 2h}]{\text{1 (0.1 mol \%), PS-TEA (1.5 eq)}}</math> <b>8ba</b></p><p><b>M.W.: 176.22 g/mol</b></p></div></div></div>                                                                                                                                                                                                                                                                                                                                  |                                                                   |       |                  |            |
| METHOD:                                                                                                                                                                                                                                                                                                                                                                                                                                                                                                                                                                                                                                            |                                                                   |       |                  |            |
| In a 4 mL screw-capped vial equipped with a magnetic stirrer, catalyst <b>1</b> (2.3 wt%, 0.0046 g, 0.1 mol%), diethylaminomethyl-polystyrene (~3.2 mmol/g, 0.469 g, 1.5 equiv), GVL (0.8 M, 1.25 mL), 4-iodotoluene ( <b>6b</b> ) (0.220 gr, 1 mmol), and methyl acrylate ( <b>7a</b> ) (0.104 g, 110 $\mu$ L, 1.2 mmol) were consecutively added and the resulting mixture was left under stirring at 130 $^\circ$ C. After 2 hours the catalyst and base were filtered off and the product was precipitated by precipitation method. Methyl (E)-3-(p-tolyl)acrylate ( <b>8ba</b> ) was obtained as a white solid (0.148 g, 84% isolated yield). |                                                                   |       |                  |            |
| Mol Formula                                                                                                                                                                                                                                                                                                                                                                                                                                                                                                                                                                                                                                        | C <sub>11</sub> H <sub>12</sub> O <sub>2</sub>                    | m.p.  | 54-56 $^\circ$ C |            |
| Elemental Analysis: Calc.: C: 74.98; H: 6.86; found: C: 75.01; H: 6.89.                                                                                                                                                                                                                                                                                                                                                                                                                                                                                                                                                                            |                                                                   |       |                  |            |
| <sup>1</sup> H NMR<br>400 MHz<br>CDCl <sub>3</sub>                                                                                                                                                                                                                                                                                                                                                                                                                                                                                                                                                                                                 | $\delta$ value                                                    | No. H | Mult.            | j value/Hz |
|                                                                                                                                                                                                                                                                                                                                                                                                                                                                                                                                                                                                                                                    | 7.67                                                              | 1     | <i>d</i>         | 16.0       |
|                                                                                                                                                                                                                                                                                                                                                                                                                                                                                                                                                                                                                                                    | 7.42                                                              | 2     | <i>d</i>         | 8.0        |
|                                                                                                                                                                                                                                                                                                                                                                                                                                                                                                                                                                                                                                                    | 7.19                                                              | 2     | <i>d</i>         | 8.0        |
|                                                                                                                                                                                                                                                                                                                                                                                                                                                                                                                                                                                                                                                    | 6.40                                                              | 1     | <i>d</i>         | 16.0       |
|                                                                                                                                                                                                                                                                                                                                                                                                                                                                                                                                                                                                                                                    | 3.80                                                              | 3     | <i>s</i>         |            |
|                                                                                                                                                                                                                                                                                                                                                                                                                                                                                                                                                                                                                                                    | 2.37                                                              | 3     | <i>s</i>         |            |
| <sup>13</sup> C NMR (100.6 MHz, CDCl <sub>3</sub> ) $\delta$ : 167.8, 145.0, 140.9, 131.8, 129.8, 128.2, 116.8, 51.8, 21.6.                                                                                                                                                                                                                                                                                                                                                                                                                                                                                                                        |                                                                   |       |                  |            |
| GC-EIMS (m/z, %): 176 (M <sup>+</sup> , 100), 175 (56), 161 (22), 146 (40), 145 (100), 131 (16), 118 (25), 117 (100), 116 (56), 115 (100), 102 (17), 91 (67), 89 (25), 65 (32), 63 (26), 57 (16), 51 (16).                                                                                                                                                                                                                                                                                                                                                                                                                                         |                                                                   |       |                  |            |



|                                                                                                                                                                                                                                                                                                                                                                                                                                                                                                                                                                                                                                                       |                                                                                               |       |       |            |
|-------------------------------------------------------------------------------------------------------------------------------------------------------------------------------------------------------------------------------------------------------------------------------------------------------------------------------------------------------------------------------------------------------------------------------------------------------------------------------------------------------------------------------------------------------------------------------------------------------------------------------------------------------|-----------------------------------------------------------------------------------------------|-------|-------|------------|
| Chem. Name                                                                                                                                                                                                                                                                                                                                                                                                                                                                                                                                                                                                                                            | Butyl (E)-3-(p-tolyl)acrylate (8bb)                                                           |       |       |            |
| Lit. Ref.                                                                                                                                                                                                                                                                                                                                                                                                                                                                                                                                                                                                                                             | N. Iranpoor, H. Firouzabadi, R. Azadi, <i>Eur. J. Org. Chem.</i> <b>2007</b> , 13, 2197-2201. |       |       |            |
| <div><div><div><p>6b + 7b <math>\xrightarrow[\text{GVL 0.8M, 130 }^{\circ}\text{C, 2h}]{\text{1 (0.1 mol \%), PS-TEA (1.5 eq)}}</math> 8bb</p><p>M.W.: 218.30 g/mol</p></div></div></div>                                                                                                                                                                                                                                                                                                                                                                                                                                                             |                                                                                               |       |       |            |
| METHOD:                                                                                                                                                                                                                                                                                                                                                                                                                                                                                                                                                                                                                                               |                                                                                               |       |       |            |
| In a 4 mL screw-capped vial equipped with a magnetic stirrer, catalyst <b>1</b> (2.3 wt%, 0.0046 g, 0.1 mol%), diethylaminomethyl-polystyrene (~3.2 mmol/g, 0.469 g, 1.5 equiv), GVL (0.8 M, 1.25 mL), 4-iodotoluene ( <b>6d</b> ) (0.220 gr, 1 mmol), and butyl acrylate ( <b>7b</b> ) (0.157 g, 174 $\mu$ L, 1.2 mmol) were consecutively added and the resulting mixture was left under stirring at 130 $^{\circ}$ C. After 2 hours the catalyst and base were filtered off. The GVL was removed by using extraction work up method. Butyl (E)-3-(p-tolyl)acrylate ( <b>8bb</b> ) was obtained as a pale yellow oil (0.192 g, 88% isolated yield). |                                                                                               |       |       |            |
| Mol Formula                                                                                                                                                                                                                                                                                                                                                                                                                                                                                                                                                                                                                                           | C <sub>14</sub> H <sub>18</sub> O <sub>2</sub>                                                | m.p.  |       |            |
| Elemental Analysis: Calc.: C: 77.03; H: 8.31; found: C:77.01; H: 8.30.                                                                                                                                                                                                                                                                                                                                                                                                                                                                                                                                                                                |                                                                                               |       |       |            |
| <sup>1</sup> H NMR<br>400 MHz<br>CDCl <sub>3</sub>                                                                                                                                                                                                                                                                                                                                                                                                                                                                                                                                                                                                    | $\delta$ value                                                                                | No. H | Mult. | j value/Hz |
|                                                                                                                                                                                                                                                                                                                                                                                                                                                                                                                                                                                                                                                       | 7.66                                                                                          | 1     | d     | 16.0       |
|                                                                                                                                                                                                                                                                                                                                                                                                                                                                                                                                                                                                                                                       | 7.42                                                                                          | 2     | d     | 8.0        |
|                                                                                                                                                                                                                                                                                                                                                                                                                                                                                                                                                                                                                                                       | 7.19                                                                                          | 2     | d     | 8.0        |
|                                                                                                                                                                                                                                                                                                                                                                                                                                                                                                                                                                                                                                                       | 6.40                                                                                          | 1     | d     | 16.0       |
|                                                                                                                                                                                                                                                                                                                                                                                                                                                                                                                                                                                                                                                       | 4.20                                                                                          | 2     | t     | 6.8        |
|                                                                                                                                                                                                                                                                                                                                                                                                                                                                                                                                                                                                                                                       | 2.37                                                                                          | 3     | s     |            |
|                                                                                                                                                                                                                                                                                                                                                                                                                                                                                                                                                                                                                                                       | 1.65-1.73                                                                                     | 2     | m     |            |
|                                                                                                                                                                                                                                                                                                                                                                                                                                                                                                                                                                                                                                                       | 1.39-1.49                                                                                     | 2     | m     |            |
|                                                                                                                                                                                                                                                                                                                                                                                                                                                                                                                                                                                                                                                       | 0.97                                                                                          | 3     | t     | 7.4        |
| <sup>13</sup> C NMR (100.6 MHz, CDCl <sub>3</sub> ) $\delta$ : 167.4, 144.7, 140.7, 131.9, 129.7, 128.2, 117.3, 64.5, 30.9, 21.6, 19.4, 13.9.                                                                                                                                                                                                                                                                                                                                                                                                                                                                                                         |                                                                                               |       |       |            |
| GC-EIMS (m/z, %): 219 (26), 218 (M <sup>+</sup> , 100), 161 (100), 147 (100), 146 (57), 145 (100), 131 (25), 119 (18), 118 (71), 117 (100), 116 (72), 115 (100), 105 (38), 102 (23), 91 (100), 89 (25), 65 (41), 63 (21).                                                                                                                                                                                                                                                                                                                                                                                                                             |                                                                                               |       |       |            |



|                                                                                                                                                                                                                                                                                                                                                                                                                                                                                                                                                                                                                                                                                                                                                                                                                                                                                                                                                                                                                                                                                                                                                                                                                                                                                                                                                                                                                                                                                                                                                                                                                                                                                                                                                                                                                                                                                                                                                                                                                                                                                                                                                                                                                                                                                                                                                                                                                                                                                                                                                                                                                                                                                                                                                                                                                                                                                                                                                                                                                                                                                                                                                                                                                                                                                                                                                                                                                                                                                                                                                                                                                                                                                                                                                                                                                                                                                                                                                                                                                                                                                                                                                                                                                                                                                                                                                                                                                                                                                                                                                                                                                                                                                                                                                                                                                                                                                                                                                                                                                                                                                                                                                                                                                                                                                                                                                                                                                                                                                                                                                                                                                                                                                                                                                                                                                                                                                                                                                                                                                                                                                                                                                                                                                                                                                                                                                                                                                                                                                                                                                                                                                                                                                                                                                                                                                                                                                                                                                                                                                                                                                                                                                                                                                                                                                                                                                                                                                                                                                                                                                                                                                                                                                                                                                                                                                                                                                                                                                                                                                                                                                                                                                                                                                                                                                                                                                                                                                                                                                                                                                                                                                                                                                                                                                                                                                                                                                                                                                                                                                                                                                                                                                                                                                                                                                                                                                                                                                                                                                                                                                                                                                                                                                                                                                                                                                                                                                                                                                                                                                                                                                                                                                                                                                                                                                                                                                                                                                                                                                                                                                                                                                                                                                                                                                                                                                                                                                                                                                                                                                                                                                                                                                                                                                                                                                                                                                                                                                                                                                                                                                                                                                                                                                                                                                                                                                                                                                                                                                                                                                                                                                                                                                                                                                                                                                                                                                                                                                                                                                                                                                                                                                                                                                                                                                                                                                                                                                                                                                                                                                                                                                                                                                                                                                                                                                                                                                                                                                                                                                                                                                                                                                                                                                                                                                                                                                                                                                                                                                                                                                                                                                                                                                                                                                                                                                                                                                              |                                                                                               |  |  |
|--------------------------------------------------------------------------------------------------------------------------------------------------------------------------------------------------------------------------------------------------------------------------------------------------------------------------------------------------------------------------------------------------------------------------------------------------------------------------------------------------------------------------------------------------------------------------------------------------------------------------------------------------------------------------------------------------------------------------------------------------------------------------------------------------------------------------------------------------------------------------------------------------------------------------------------------------------------------------------------------------------------------------------------------------------------------------------------------------------------------------------------------------------------------------------------------------------------------------------------------------------------------------------------------------------------------------------------------------------------------------------------------------------------------------------------------------------------------------------------------------------------------------------------------------------------------------------------------------------------------------------------------------------------------------------------------------------------------------------------------------------------------------------------------------------------------------------------------------------------------------------------------------------------------------------------------------------------------------------------------------------------------------------------------------------------------------------------------------------------------------------------------------------------------------------------------------------------------------------------------------------------------------------------------------------------------------------------------------------------------------------------------------------------------------------------------------------------------------------------------------------------------------------------------------------------------------------------------------------------------------------------------------------------------------------------------------------------------------------------------------------------------------------------------------------------------------------------------------------------------------------------------------------------------------------------------------------------------------------------------------------------------------------------------------------------------------------------------------------------------------------------------------------------------------------------------------------------------------------------------------------------------------------------------------------------------------------------------------------------------------------------------------------------------------------------------------------------------------------------------------------------------------------------------------------------------------------------------------------------------------------------------------------------------------------------------------------------------------------------------------------------------------------------------------------------------------------------------------------------------------------------------------------------------------------------------------------------------------------------------------------------------------------------------------------------------------------------------------------------------------------------------------------------------------------------------------------------------------------------------------------------------------------------------------------------------------------------------------------------------------------------------------------------------------------------------------------------------------------------------------------------------------------------------------------------------------------------------------------------------------------------------------------------------------------------------------------------------------------------------------------------------------------------------------------------------------------------------------------------------------------------------------------------------------------------------------------------------------------------------------------------------------------------------------------------------------------------------------------------------------------------------------------------------------------------------------------------------------------------------------------------------------------------------------------------------------------------------------------------------------------------------------------------------------------------------------------------------------------------------------------------------------------------------------------------------------------------------------------------------------------------------------------------------------------------------------------------------------------------------------------------------------------------------------------------------------------------------------------------------------------------------------------------------------------------------------------------------------------------------------------------------------------------------------------------------------------------------------------------------------------------------------------------------------------------------------------------------------------------------------------------------------------------------------------------------------------------------------------------------------------------------------------------------------------------------------------------------------------------------------------------------------------------------------------------------------------------------------------------------------------------------------------------------------------------------------------------------------------------------------------------------------------------------------------------------------------------------------------------------------------------------------------------------------------------------------------------------------------------------------------------------------------------------------------------------------------------------------------------------------------------------------------------------------------------------------------------------------------------------------------------------------------------------------------------------------------------------------------------------------------------------------------------------------------------------------------------------------------------------------------------------------------------------------------------------------------------------------------------------------------------------------------------------------------------------------------------------------------------------------------------------------------------------------------------------------------------------------------------------------------------------------------------------------------------------------------------------------------------------------------------------------------------------------------------------------------------------------------------------------------------------------------------------------------------------------------------------------------------------------------------------------------------------------------------------------------------------------------------------------------------------------------------------------------------------------------------------------------------------------------------------------------------------------------------------------------------------------------------------------------------------------------------------------------------------------------------------------------------------------------------------------------------------------------------------------------------------------------------------------------------------------------------------------------------------------------------------------------------------------------------------------------------------------------------------------------------------------------------------------------------------------------------------------------------------------------------------------------------------------------------------------------------------------------------------------------------------------------------------------------------------------------------------------------------------------------------------------------------------------------------------------------------------------------------------------------------------------------------------------------------------------------------------------------------------------------------------------------------------------------------------------------------------------------------------------------------------------------------------------------------------------------------------------------------------------------------------------------------------------------------------------------------------------------------------------------------------------------------------------------------------------------------------------------------------------------------------------------------------------------------------------------------------------------------------------------------------------------------------------------------------------------------------------------------------------------------------------------------------------------------------------------------------------------------------------------------------------------------------------------------------------------------------------------------------------------------------------------------------------------------------------------------------------------------------------------------------------------------------------------------------------------------------------------------------------------------------------------------------------------------------------------------------------------------------------------------------------------------------------------------------------------------------------------------------------------------------------------------------------------------------------------------------------------------------------------------------------------------------------------------------------------------------------------------------------------------------------------------------------------------------------------------------------------------------------------------------------------------------------------------------------------------------------------------------------------------------------------------------------------------------------------------------------------------------------------------------------------------------------------------------------------------------------------------------------------------------------------------------------------------------------------------------------------------------------------------------------------------------------------------------------------------------------------------------------------------------------------------------------------------------------------------------------------------------------------------------------------------------------------------------------------------------------------------------------------------------------------------------------------------------------------------------------------------------------------------------------------------------------------------------------------------------------------------------------------------------------------------------------------------------------------------------------------------------------------------------------------------------------------------------------------------------------------------------------------------------------------------------------------------------------------------------------------------------------------------------------------------------------------------------------------------------------------------------------------------------------------------------------------------------------------------------------------------------------------------------------------------------------------------------------------------------------------------------------------------------------------------------------------------------------------------------------------------------------------------------------------------------------------------------------------------------------------------------------------------------------------------------------------------------------------------------------------------------------------------------------------------------------------------------------------------------------------------------------------------------------------------------------------------------------------------------------------------------------------------------------------------------------------------------------------------------------------------------------------------------------------------------------------------------------------------------------------------------------------------------------------------|-----------------------------------------------------------------------------------------------|--|--|
| Chem.                                                                                                                                                                                                                                                                                                                                                                                                                                                                                                                                                                                                                                                                                                                                                                                                                                                                                                                                                                                                                                                                                                                                                                                                                                                                                                                                                                                                                                                                                                                                                                                                                                                                                                                                                                                                                                                                                                                                                                                                                                                                                                                                                                                                                                                                                                                                                                                                                                                                                                                                                                                                                                                                                                                                                                                                                                                                                                                                                                                                                                                                                                                                                                                                                                                                                                                                                                                                                                                                                                                                                                                                                                                                                                                                                                                                                                                                                                                                                                                                                                                                                                                                                                                                                                                                                                                                                                                                                                                                                                                                                                                                                                                                                                                                                                                                                                                                                                                                                                                                                                                                                                                                                                                                                                                                                                                                                                                                                                                                                                                                                                                                                                                                                                                                                                                                                                                                                                                                                                                                                                                                                                                                                                                                                                                                                                                                                                                                                                                                                                                                                                                                                                                                                                                                                                                                                                                                                                                                                                                                                                                                                                                                                                                                                                                                                                                                                                                                                                                                                                                                                                                                                                                                                                                                                                                                                                                                                                                                                                                                                                                                                                                                                                                                                                                                                                                                                                                                                                                                                                                                                                                                                                                                                                                                                                                                                                                                                                                                                                                                                                                                                                                                                                                                                                                                                                                                                                                                                                                                                                                                                                                                                                                                                                                                                                                                                                                                                                                                                                                                                                                                                                                                                                                                                                                                                                                                                                                                                                                                                                                                                                                                                                                                                                                                                                                                                                                                                                                                                                                                                                                                                                                                                                                                                                                                                                                                                                                                                                                                                                                                                                                                                                                                                                                                                                                                                                                                                                                                                                                                                                                                                                                                                                                                                                                                                                                                                                                                                                                                                                                                                                                                                                                                                                                                                                                                                                                                                                                                                                                                                                                                                                                                                                                                                                                                                                                                                                                                                                                                                                                                                                                                                                                                                                                                                                                                                                                                                                                                                                                                                                                                                                                                                                                                                                                                                                                                                        | Butyl (E)-3-(4-methoxyphenyl)acrylate (8cb)                                                   |  |  |
| Lit. Ref.                                                                                                                                                                                                                                                                                                                                                                                                                                                                                                                                                                                                                                                                                                                                                                                                                                                                                                                                                                                                                                                                                                                                                                                                                                                                                                                                                                                                                                                                                                                                                                                                                                                                                                                                                                                                                                                                                                                                                                                                                                                                                                                                                                                                                                                                                                                                                                                                                                                                                                                                                                                                                                                                                                                                                                                                                                                                                                                                                                                                                                                                                                                                                                                                                                                                                                                                                                                                                                                                                                                                                                                                                                                                                                                                                                                                                                                                                                                                                                                                                                                                                                                                                                                                                                                                                                                                                                                                                                                                                                                                                                                                                                                                                                                                                                                                                                                                                                                                                                                                                                                                                                                                                                                                                                                                                                                                                                                                                                                                                                                                                                                                                                                                                                                                                                                                                                                                                                                                                                                                                                                                                                                                                                                                                                                                                                                                                                                                                                                                                                                                                                                                                                                                                                                                                                                                                                                                                                                                                                                                                                                                                                                                                                                                                                                                                                                                                                                                                                                                                                                                                                                                                                                                                                                                                                                                                                                                                                                                                                                                                                                                                                                                                                                                                                                                                                                                                                                                                                                                                                                                                                                                                                                                                                                                                                                                                                                                                                                                                                                                                                                                                                                                                                                                                                                                                                                                                                                                                                                                                                                                                                                                                                                                                                                                                                                                                                                                                                                                                                                                                                                                                                                                                                                                                                                                                                                                                                                                                                                                                                                                                                                                                                                                                                                                                                                                                                                                                                                                                                                                                                                                                                                                                                                                                                                                                                                                                                                                                                                                                                                                                                                                                                                                                                                                                                                                                                                                                                                                                                                                                                                                                                                                                                                                                                                                                                                                                                                                                                                                                                                                                                                                                                                                                                                                                                                                                                                                                                                                                                                                                                                                                                                                                                                                                                                                                                                                                                                                                                                                                                                                                                                                                                                                                                                                                                                                                                                                                                                                                                                                                                                                                                                                                                                                                                                                                                                                                    | N. Iranpoor, H. Firouzabadi, R. Azadi, <i>Eur. J. Org. Chem.</i> <b>2007</b> , 13, 2197-2201. |  |  |
| <div><div><div><div>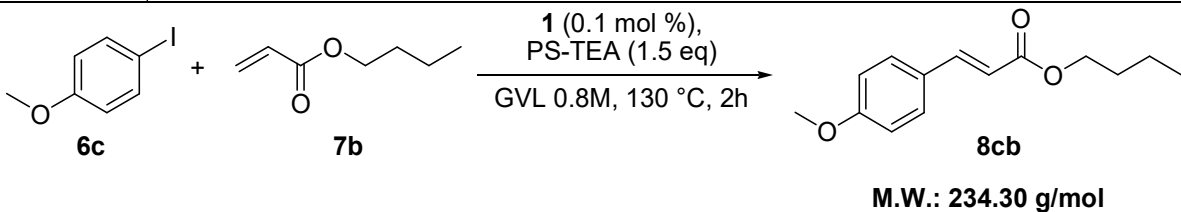</div><div><div></div><div></div><div></div><div></div><div></div><div></div><div></div><div></div><div></div><div></div><div></div><div></div><div></div><div></div><div></div><div></div><div></div><div></div><div></div><div></div><div></div><div></div><div></div><div></div><div></div><div></div><div></div><div></div><div></div><div></div><div></div><div></div><div></div><div></div><div></div><div></div><div></div><div></div><div></div><div></div><div></div><div></div><div></div><div></div><div></div><div></div><div></div><div></div><div></div><div></div><div></div><div></div><div></div><div></div><div></div><div></div><div></div><div></div><div></div><div></div><div></div><div></div><div></div><div></div><div></div><div></div><div></div><div></div><div></div><div></div><div></div><div></div><div></div><div></div><div></div><div></div><div></div><div></div><div></div><div></div><div></div><div></div><div></div><div></div><div></div><div></div><div></div><div></div><div></div><div></div><div></div><div></div><div></div><div></div><div></div><div></div><div></div><div></div><div></div><div></div><div></div><div></div><div></div><div></div><div></div><div></div><div></div><div></div><div></div><div></div><div></div><div></div><div></div><div></div><div></div><div></div><div></div><div></div><div></div><div></div><div></div><div></div><div></div><div></div><div></div><div></div><div></div><div></div><div></div><div></div><div></div><div></div><div></div><div></div><div></div><div></div><div></div><div></div><div></div><div></div><div></div><div></div><div></div><div></div><div></div><div></div><div></div><div></div><div></div><div></div><div></div><div></div><div></div><div></div><div></div><div></div><div></div><div></div><div></div><div></div><div></div><div></div><div></div><div></div><div></div><div></div><div></div><div></div><div></div><div></div><div></div><div></div><div></div><div></div><div></div><div></div><div></div><div></div><div></div><div></div><div></div><div></div><div></div><div></div><div></div><div></div><div></div><div></div><div></div><div></div><div></div><div></div><div></div><div></div><div></div><div></div><div></div><div></div><div></div><div></div><div></div><div></div><div></div><div></div><div></div><div></div><div></div><div></div><div></div><div></div><div></div><div></div><div></div><div></div><div></div><div></div><div></div><div></div><div></div><div></div><div></div><div></div><div></div><div></div><div></div><div></div><div></div><div></div><div></div><div></div><div></div><div></div><div></div><div></div><div></div><div></div><div></div><div></div><div></div><div></div><div></div><div></div><div></div><div></div><div></div><div></div><div></div><div></div><div></div><div></div><div></div><div></div><div></div><div></div><div></div><div></div><div></div><div></div><div></div><div></div><div></div><div></div><div></div><div></div><div></div><div></div><div></div><div></div><div></div><div></div><div></div><div></div><div></div><div></div><div></div><div></div><div></div><div></div><div></div><div></div><div></div><div></div><div></div><div></div><div></div><div></div><div></div><div></div><div></div><div></div><div></div><div></div><div></div><div></div><div></div><div></div><div></div><div></div><div></div><div></div><div></div><div></div><div></div><div></div><div></div><div></div><div></div><div></div><div></div><div></div><div></div><div></div><div></div><div></div><div></div><div></div><div></div><div></div><div></div><div></div><div></div><div></div><div></div><div></div><div></div><div></div><div></div><div></div><div></div><div></div><div></div><div></div><div></div><div></div><div></div><div></div><div></div><div></div><div></div><div></div><div></div><div></div><div></div><div></div><div></div><div></div><div></div><div></div><div></div><div></div><div></div><div></div><div></div><div></div><div></div><div></div><div></div><div></div><div></div><div></div><div></div><div></div><div></div><div></div><div></div><div></div><div></div><div></div><div></div><div></div><div></div><div></div><div></div><div></div><div></div><div></div><div></div><div></div><div></div><div></div><div></div><div></div><div></div><div></div><div></div><div></div><div></div><div></div><div></div><div></div><div></div><div></div><div></div><div></div><div></div><div></div><div></div><div></div><div></div><div></div><div></div><div></div><div></div><div></div><div></div><div></div><div></div><div></div><div></div><div></div><div></div><div></div><div></div><div></div><div></div><div></div><div></div><div></div><div></div><div></div><div></div><div></div><div></div><div></div><div></div><div></div><div></div><div></div><div></div><div></div><div></div><div></div><div></div><div></div><div></div><div></div><div></div><div></div><div></div><div></div><div></div><div></div><div></div><div></div><div></div><div></div><div></div><div></div><div></div><div></div><div></div><div></div><div></div><div></div><div></div><div></div><div></div><div></div><div></div><div></div><div></div><div></div><div></div><div></div><div></div><div></div><div></div><div></div><div></div><div></div><div></div><div></div><div></div><div></div><div></div><div></div><div></div><div></div><div></div><div></div><div></div><div></div><div></div><div></div><div></div><div></div><div></div><div></div><div></div><div></div><div></div><div></div><div></div><div></div><div></div><div></div><div></div><div></div><div></div><div></div><div></div><div></div><div></div><div></div><div></div><div></div><div></div><div></div><div></div><div></div><div></div><div></div><div></div><div></div><div></div><div></div><div></div><div></div><div></div><div></div><div></div><div></div><div></div><div></div><div></div><div></div><div></div><div></div><div></div><div></div><div></div><div></div><div></div><div></div><div></div><div></div><div></div><div></div><div></div><div></div><div></div><div></div><div></div><div></div><div></div><div></div><div></div><div></div><div></div><div></div><div></div><div></div><div></div><div></div><div></div><div></div><div></div><div></div><div></div><div></div><div></div><div></div><div></div><div></div><div></div><div></div><div></div><div></div><div></div><div></div><div></div><div></div><div></div><div></div><div></div><div></div><div></div><div></div><div></div><div></div><div></div><div></div><div></div><div></div><div></div><div></div><div></div><div></div><div></div><div></div><div></div><div></div><div></div><div></div><div></div><div></div><div></div><div></div><div></div><div></div><div></div><div></div><div></div><div></div><div></div><div></div><div></div><div></div><div></div><div></div><div></div><div></div><div></div><div></div><div></div><div></div><div></div><div></div><div></div><div></div><div></div><div></div><div></div><div></div><div></div><div></div><div></div><div></div><div></div><div></div><div></div><div></div><div></div><div></div><div></div><div></div><div></div><div></div><div></div><div></div><div></div><div></div><div></div><div></div><div></div><div></div><div></div><div></div><div></div><div></div><div></div><div></div><div></div><div></div><div></div><div></div><div></div><div></div><div></div><div></div><div></div><div></div><div></div><div></div><div></div><div></div><div></div><div></div><div></div><div></div><div></div><div></div><div></div><div></div><div></div><div></div><div></div><div></div><div></div><div></div><div></div><div></div><div></div><div></div><div></div><div></div><div></div><div></div><div></div><div></div><div></div><div></div><div></div><div></div><div></div><div></div><div></div><div></div><div></div><div></div><div></div><div></div><div></div><div></div><div></div><div></div><div></div><div></div><div></div><div></div><div></div><div></div><div></div><div></div><div></div><div></div><div></div><div></div><div></div><div></div><div></div><div></div><div></div><div></div><div></div><div></div><div></div><div></div><div></div><div></div><div></div><div></div><div></div><div></div><div></div><div></div><div></div><div></div><div></div><div></div><div></div><div></div><div></div><div></div><div></div><div></div><div></div><div></div><div></div><div></div><div></div><div></div><div></div><div></div><div></div><div></div><div></div><div></div><div></div><div></div><div></div><div></div><div></div><div></div><div></div><div></div><div></div><div></div><div></div><div></div><div></div><div></div><div></div><div></div><div></div><div></div><div></div><div></div><div></div><div></div><div></div><div></div><div></div><div></div><div></div><div></div><div></div><div></div><div></div><div></div><div></div><div></div><div></div><div></div><div></div><div></div><div></div><div></div><div></div><div></div><div></div><div></div><div></div><div></div><div></div><div></div><div></div><div></div><div></div><div></div><div></div><div></div><div></div><div></div><div></div><div></div><div></div><div></div><div></div><div></div><div></div><div></div><div></div><div></div><div></div><div></div><div></div><div></div><div></div><div></div><div></div><div></div><div></div><div></div><div></div><div></div><div></div><div></div><div></div><div></div><div></div><div></div><div></div><div></div><div></div><div></div><div></div><div></div><div></div><div></div><div></div><div></div><div></div><div></div><div></div><div></div><div></div><div></div><div></div><div></div><div></div><div></div><div></div><div></div><div></div><div></div><div></div><div></div><div></div><div></div><div></div><div></div><div></div><div></div><div></div><div></div><div></div><div></div><div></div><div></div><div></div><div></div><div></div><div></div><div></div><div></div><div></div><div></div><div></div><div></div><div></div><div></div><div></div><div></div><div></div><div></div><div></div><div></div><div></div><div></div><div></div><div></div><div></div><div></div><div></div><div></div><div></div><div></div><div></div><div></div><div></div><div></div><div></div><div></div><div></div><div></div><div></div><div></div><div></div><div></div><div></div><div></div><div></div><div></div><div></div><div></div><div></div><div></div><div></div><div></div><div></div><div></div><div></div><div></div><div></div><div></div><div></div><div></div><div></div><div></div><div></div><div></div><div></div><div></div><div></div><div></div><div></div><div></div><div></div><div></div><div></div><div></div><div></div><div></div><div></div><div></div><div></div><div></div><div></div><div></div><div></div><div></div><div></div><div></div><div></div><div></div><div></div><div></div><div></div><div></div><div></div><div></div><div></div><div></div><div></div><div></div><div></div><div></div><div></div><div></div><div></div><div></div><div></div><div></div><div></div><div></div><div></div><div></div><div></div><div></div><div></div><div></div><div></div><div></div><div></div><div></div><div></div><div></div><div></div><div></div><div></div><div></div><div></div><div></div><div></div><div></div><div></div><div></div><div></div><div></div><div></div><div></div><div></div><div></div><div></div><div></div><div></div><div></div><div></div><div></div><div></div><div></div><div></div><div></div><div></div><div></div><div></div><div></div><div></div><div></div><div></div><div></div><div></div><div></div><div></div><div></div><div></div><div></div><div></div><div></div><div></div><div></div><div></div><div></div><div></div><div></div><div></div><div></div><div></div><div></div><div></div><div></div><div></div><div></div><div></div><div></div><div></div><div></div><div></div><div></div><div></div><div></div><div></div><div></div><div></div><div></div><div></div><div></div><div></div><div></div><div></div><div></div><div></div><div></div><div></div><div></div><div></div><div></div><div></div><div></div><div></div><div></div><div></div><div></div><div></div><div></div><div></div><div></div><div></div><div></div><div></div><div></div><div></div><div></div><div></div><div></div><div></div><div></div><div></div><div></div><div></div><div></div><div></div><div></div><div></div><div></div><div></div><div></div><div></div><div></div><div></div><div></div><div></div><div></div><div></div><div></div><div></div><div></div><div></div><div></div><div></div><div></div><div></div><div></div><div></div><div></div><div></div><div></div><div></div><div></div><div></div><div></div><div></div><div></div><div></div><div></div><div></div><div></div><div></div><div></div><div></div><div></div><div></div><div></div><div></div><div></div><div></div><div></div><div></div><div></div><div></div><div></div><div></div><div></div><div></div><div></div><div></div><div></div><div></div><div></div><div></div><div></div><div></div><div></div><div></div><div></div><div></div><div></div><div></div><div></div><div></div><div></div><div></div><div></div><div></div><div></div><div></div><div></div><div></div><div></div><div></div><div></div><div></div><div></div><div></div><div></div><div></div><div></div><div></div><div></div><div></div><div></div><div></div><div></div><div></div><div></div><div></div><div></div><div></div><div></div><div></div><div></div><div></div><div></div><div></div><div></div><div></div><div></div><div></div><div></div><div></div><div></div><div></div><div></div><div></div><div></div><div></div><div></div><div></div><div></div><div></div><div></div><div></div><div></div><div></div><div></div><div></div><div></div><div></div><div></div><div></div><div></div><div></div><div></div><div></div><div></div><div></div><div></div><div></div><div></div><div></div></div></div></div></div> |                                                                                               |  |  |

|                                                                                                                                                                                                                                                                                                                                                                                                                                                                                                                                                                                                                                                            |                                                                                                                                           |       |           |            |
|------------------------------------------------------------------------------------------------------------------------------------------------------------------------------------------------------------------------------------------------------------------------------------------------------------------------------------------------------------------------------------------------------------------------------------------------------------------------------------------------------------------------------------------------------------------------------------------------------------------------------------------------------------|-------------------------------------------------------------------------------------------------------------------------------------------|-------|-----------|------------|
| Chem. Name                                                                                                                                                                                                                                                                                                                                                                                                                                                                                                                                                                                                                                                 | Methyl (E)-3-(4-acetylphenyl)acrylate (8da)                                                                                               |       |           |            |
| Lit. Ref.                                                                                                                                                                                                                                                                                                                                                                                                                                                                                                                                                                                                                                                  | J. D. Senra, L. F. B. Malta, A. L. F. Souza, L. C. S. Aguiar, O. A. C. Antunes, <i>Adv. Synth. Catal.</i> , <b>2008</b> , 350, 2551-2558. |       |           |            |
| <div><div><div><div>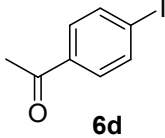<p><b>6d</b></p></div><div>+</div><div><div><p><b>7a</b></p></div></div><div><div><div><div></div><div><div><p><b>8da</b></p><p>M.W.: 204.23 g/mol</p></div></div></div></div></div></div></div></div>                                                                                          |                                                                                                                                           |       |           |            |
| METHOD:                                                                                                                                                                                                                                                                                                                                                                                                                                                                                                                                                                                                                                                    |                                                                                                                                           |       |           |            |
| In a 4 mL screw-capped vial equipped with a magnetic stirrer, catalyst <b>1</b> (2.3 wt%, 0.0046 g, 0.1 mol%), diethylaminomethyl-polystyrene (~3.2 mmol/g, 0.469 g, 1.5 equiv), GVL (0.8 M, 1.25 mL), 4'-iodoacetophenone ( <b>6d</b> ) (0.251 gr, 1 mmol), and methyl acrylate ( <b>7a</b> ) (0.104 g, 110 μL, 1.2 mmol) were consecutively added and the resulting mixture was left under stirring at 130 °C. After 2 hours the catalyst and base were filtered off and the product was isolated by precipitation work up method. Methyl (E)-3-(4-acetylphenyl)acrylate <b>8da</b> ) was obtained as a pale yellow solid (0.182 g, 89% isolated yield). |                                                                                                                                           |       |           |            |
| Mol Formula                                                                                                                                                                                                                                                                                                                                                                                                                                                                                                                                                                                                                                                | C <sub>12</sub> H <sub>12</sub> O <sub>3</sub>                                                                                            | m.p.  | 104-106°C |            |
| Elemental Analysis: Calc.: C: 70.58; H: 5.92; found: C: 70.61; H: 5.93.                                                                                                                                                                                                                                                                                                                                                                                                                                                                                                                                                                                    |                                                                                                                                           |       |           |            |
| <sup>1</sup> H NMR<br>400 MHz<br>CDCl <sub>3</sub>                                                                                                                                                                                                                                                                                                                                                                                                                                                                                                                                                                                                         | δ value                                                                                                                                   | No. H | Mult.     | j value/Hz |
|                                                                                                                                                                                                                                                                                                                                                                                                                                                                                                                                                                                                                                                            | 7.97                                                                                                                                      | 2     | <i>d</i>  | 8.0        |
|                                                                                                                                                                                                                                                                                                                                                                                                                                                                                                                                                                                                                                                            | 7.71                                                                                                                                      | 1     | <i>d</i>  | 16.0       |
|                                                                                                                                                                                                                                                                                                                                                                                                                                                                                                                                                                                                                                                            | 7.61                                                                                                                                      | 2     | <i>d</i>  | 8.0        |
|                                                                                                                                                                                                                                                                                                                                                                                                                                                                                                                                                                                                                                                            | 6.53                                                                                                                                      | 1     | <i>d</i>  | 16.0       |
|                                                                                                                                                                                                                                                                                                                                                                                                                                                                                                                                                                                                                                                            | 3.82                                                                                                                                      | 3     | <i>s</i>  |            |
|                                                                                                                                                                                                                                                                                                                                                                                                                                                                                                                                                                                                                                                            | 2.62                                                                                                                                      | 3     | <i>s</i>  |            |
| <sup>13</sup> C NMR (100.6 MHz, CDCl <sub>3</sub> ) δ : 197.3, 166.9, 143.3, 138.7, 138.1, 128.9, 128.2, 120.3, 51.9, 26.7.                                                                                                                                                                                                                                                                                                                                                                                                                                                                                                                                |                                                                                                                                           |       |           |            |
| GC-EIMS (m/z, %): 205 (22), 204 (M <sup>+</sup> , 100), 190 (34), 189 (81), 188 (24), 173 (24), 161 (62), 131 (37), 130 (16), 129 (27), 118 (26), 103 (20), 102 (72), 101 (18), 76 (31), 75 (24), 74 (16), 51 (26), 50 (19).                                                                                                                                                                                                                                                                                                                                                                                                                               |                                                                                                                                           |       |           |            |

|                                                                                                                                                                                                                                                                                                                                                                                                                                                                                                                                                                                                                                                    |                                                                                               |       |          |            |
|----------------------------------------------------------------------------------------------------------------------------------------------------------------------------------------------------------------------------------------------------------------------------------------------------------------------------------------------------------------------------------------------------------------------------------------------------------------------------------------------------------------------------------------------------------------------------------------------------------------------------------------------------|-----------------------------------------------------------------------------------------------|-------|----------|------------|
| Chem. Name                                                                                                                                                                                                                                                                                                                                                                                                                                                                                                                                                                                                                                         | Butyl (E)-3-(4-acetylphenyl)acrylate (8db)                                                    |       |          |            |
| Lit. Ref.                                                                                                                                                                                                                                                                                                                                                                                                                                                                                                                                                                                                                                          | N. Iranpoor, H. Firouzabadi, R. Azadi, <i>Eur. J. Org. Chem.</i> <b>2007</b> , 13, 2197-2201. |       |          |            |
| <div>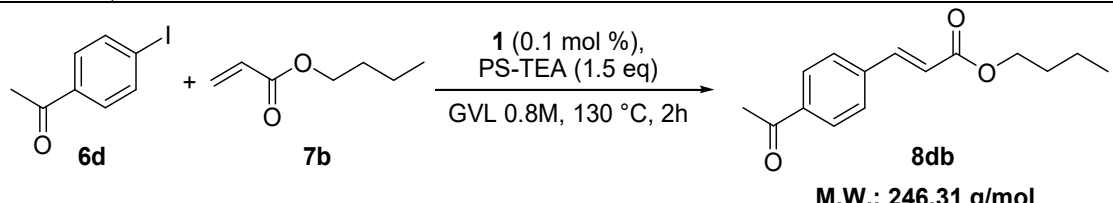</div> <p style="text-align: center;"><b>8db</b><br/>M.W.: 246.31 g/mol</p>                                                                                                                                                                                                                                                                                                                                                                                                                                                                                 |                                                                                               |       |          |            |
| METHOD:                                                                                                                                                                                                                                                                                                                                                                                                                                                                                                                                                                                                                                            |                                                                                               |       |          |            |
| In a 4 mL screw-capped vial equipped with a magnetic stirrer, catalyst <b>1</b> (2.3 wt%, 0.0046 g, 0.1 mol%), diethylaminomethyl-polystyrene (~3.2 mmol/g, 0.469 g, 1.5 equiv), GVL (0.8 M, 1.25 mL), 4'-iodoacetophenone ( <b>6d</b> ) (0.251 gr, 1 mmol), and butyl acrylate ( <b>7b</b> ) (0.157 g, 174 $\mu$ L, 1.2 mmol) were consecutively added and the resulting mixture was left under stirring at 130 °C. After 2 hours the catalyst and base were filtered off. The GVL was removed by using extraction work up method. Butyl (E)-3-(4-acetylphenyl)acrylate ( <b>8g</b> ) was obtained as a yellow oil (0.230 g, 93% isolated yield). |                                                                                               |       |          |            |
| Mol Formula                                                                                                                                                                                                                                                                                                                                                                                                                                                                                                                                                                                                                                        | C <sub>15</sub> H <sub>18</sub> O <sub>3</sub>                                                | m.p.  |          |            |
| Elemental Analysis: Calc.: C: 73.15; H: 7.37; found: C: 73.12; H: 7.36.                                                                                                                                                                                                                                                                                                                                                                                                                                                                                                                                                                            |                                                                                               |       |          |            |
| <sup>1</sup> H NMR<br>400 MHz<br>CDCl <sub>3</sub>                                                                                                                                                                                                                                                                                                                                                                                                                                                                                                                                                                                                 | $\delta$ value                                                                                | No. H | Mult.    | j value/Hz |
|                                                                                                                                                                                                                                                                                                                                                                                                                                                                                                                                                                                                                                                    | 7.94                                                                                          | 2     | <i>d</i> | 8.0        |
|                                                                                                                                                                                                                                                                                                                                                                                                                                                                                                                                                                                                                                                    | 7.66                                                                                          | 1     | <i>d</i> | 16.0       |
|                                                                                                                                                                                                                                                                                                                                                                                                                                                                                                                                                                                                                                                    | 7.58                                                                                          | 2     | <i>d</i> | 8.0        |
|                                                                                                                                                                                                                                                                                                                                                                                                                                                                                                                                                                                                                                                    | 6.50                                                                                          | 1     | <i>d</i> | 16.0       |
|                                                                                                                                                                                                                                                                                                                                                                                                                                                                                                                                                                                                                                                    | 4.20                                                                                          | 2     | <i>t</i> | 6.6        |
|                                                                                                                                                                                                                                                                                                                                                                                                                                                                                                                                                                                                                                                    | 2.59                                                                                          | 3     | <i>s</i> |            |
|                                                                                                                                                                                                                                                                                                                                                                                                                                                                                                                                                                                                                                                    | 1.65-1.70                                                                                     | 2     | <i>m</i> |            |
|                                                                                                                                                                                                                                                                                                                                                                                                                                                                                                                                                                                                                                                    | 1.37-1.47                                                                                     | 2     | <i>m</i> |            |
|                                                                                                                                                                                                                                                                                                                                                                                                                                                                                                                                                                                                                                                    | 0.94                                                                                          | 3     | <i>t</i> | 7.4        |
| <sup>13</sup> C NMR (100.6 MHz, CDCl <sub>3</sub> ) $\delta$ : 197.4, 166.6, 143.0, 138.9, 138.0, 128.9, 128.2, 120.9, 64.7, 30.8, 26.8, 19.3, 13.8.                                                                                                                                                                                                                                                                                                                                                                                                                                                                                               |                                                                                               |       |          |            |
| GC-EIMS (m/z, %): 246 (M <sup>+</sup> , 65), 232 (28), 231 (92), 191 (20), 190 (51), 176 (34), 175 (100), 173 (39), 147 (24), 131 (71), 130 (19), 129 (16).                                                                                                                                                                                                                                                                                                                                                                                                                                                                                        |                                                                                               |       |          |            |

|                                                                                                                                                                                                                                                                                                                                                                                                                                                                                                                                                                                                                                                                                                                                        |                                                                                                                         |       |                  |            |
|----------------------------------------------------------------------------------------------------------------------------------------------------------------------------------------------------------------------------------------------------------------------------------------------------------------------------------------------------------------------------------------------------------------------------------------------------------------------------------------------------------------------------------------------------------------------------------------------------------------------------------------------------------------------------------------------------------------------------------------|-------------------------------------------------------------------------------------------------------------------------|-------|------------------|------------|
| Chem. Name                                                                                                                                                                                                                                                                                                                                                                                                                                                                                                                                                                                                                                                                                                                             | Methyl (E)-3-(thiophen-2-yl)acrylate (8ea)                                                                              |       |                  |            |
| Lit. Ref.                                                                                                                                                                                                                                                                                                                                                                                                                                                                                                                                                                                                                                                                                                                              | A. El-Batta, C. Jiang, W. Zhao, R. Anness, A. L. Cooksy, M. Bergdahl, <i>J. Org. Chem.</i> <b>2007</b> , 72, 5244-5259. |       |                  |            |
| <div><div><div><p><b>6e</b> + <b>7a</b> <math>\xrightarrow[\text{GVL 0.8M, 130 } ^\circ\text{C, 2h}]{\text{1 (0.1 mol \%), PS-TEA (1.5 eq)}}</math> <b>8ea</b></p><p><b>M.W.: 168.21 g/mol</b></p></div></div></div>                                                                                                                                                                                                                                                                                                                                                                                                                                                                                                                   |                                                                                                                         |       |                  |            |
| METHOD:                                                                                                                                                                                                                                                                                                                                                                                                                                                                                                                                                                                                                                                                                                                                |                                                                                                                         |       |                  |            |
| In a 4 mL screw-capped vial equipped with a magnetic stirrer, catalyst <b>1</b> (2.3 wt%, 0.0046 g, 0.1 mol%), diethylaminomethyl-polystyrene (~3.2 mmol/g, 0.469 g, 1.5 equiv), GVL (0.8 M, 1.25 mL), 2-iodothiophene ( <b>6e</b> ) (0.214 g, 113 $\mu$ L, 1 mmol), and methyl acrylate ( <b>7a</b> ) (0.104 g, 110 $\mu$ L, 1.2 mmol) were consecutively added and the resulting mixture was left under stirring at 130 $^\circ$ C. After 2 hours the catalyst and base were filtered off. The GVL was removed by using extraction work up method. Finally, methyl (E)-3-(thiophen-2-yl)acrylate ( <b>11a</b> ) was obtained as a pale yellow solid after purification by SiO <sub>2</sub> scavenging (0.133 g, 79% isolated yield). |                                                                                                                         |       |                  |            |
| Mol Formula                                                                                                                                                                                                                                                                                                                                                                                                                                                                                                                                                                                                                                                                                                                            | C <sub>8</sub> H <sub>8</sub> O <sub>2</sub> S                                                                          | m.p.  | 44-46 $^\circ$ C |            |
| Elemental Analysis: Calc.: C: 57.12; H: 4.79; S: 19.06; found: C: 57.11; H: 4.79; S: 19.03.                                                                                                                                                                                                                                                                                                                                                                                                                                                                                                                                                                                                                                            |                                                                                                                         |       |                  |            |
| <sup>1</sup> H NMR<br>400 MHz<br>CDCl <sub>3</sub>                                                                                                                                                                                                                                                                                                                                                                                                                                                                                                                                                                                                                                                                                     | $\delta$ value                                                                                                          | No. H | Mult.            | j value/Hz |
|                                                                                                                                                                                                                                                                                                                                                                                                                                                                                                                                                                                                                                                                                                                                        | 7.78                                                                                                                    | 1     | <i>d</i>         | 15.6       |
|                                                                                                                                                                                                                                                                                                                                                                                                                                                                                                                                                                                                                                                                                                                                        | 7.36                                                                                                                    | 1     | <i>d</i>         | 4.8        |
|                                                                                                                                                                                                                                                                                                                                                                                                                                                                                                                                                                                                                                                                                                                                        | 7.23-7.25                                                                                                               | 1     | <i>m</i>         |            |
|                                                                                                                                                                                                                                                                                                                                                                                                                                                                                                                                                                                                                                                                                                                                        | 7.03-7.05                                                                                                               | 1     | <i>m</i>         |            |
|                                                                                                                                                                                                                                                                                                                                                                                                                                                                                                                                                                                                                                                                                                                                        | 6.23                                                                                                                    | 1     | <i>d</i>         | 15.6       |
|                                                                                                                                                                                                                                                                                                                                                                                                                                                                                                                                                                                                                                                                                                                                        | 3.78                                                                                                                    | 3     | <i>s</i>         |            |
| <sup>13</sup> C NMR (100.6 MHz, CDCl <sub>3</sub> ) $\delta$ : 167.4, 139.6, 137.4, 131.1, 128.6, 128.2, 116.7, 51.8.                                                                                                                                                                                                                                                                                                                                                                                                                                                                                                                                                                                                                  |                                                                                                                         |       |                  |            |
| GC-EIMS (m/z, %): 170 (24), 169 (46), 168 (M <sup>+</sup> , 100), 166 (37), 139 (36), 138 (63), 137 (100), 123 (17), 111 (21), 110 (75), 109 (100), 108 (74), 97 (22), 82 (20), 69 (60), 65 (100), 63 (33), 58 (22), 57 (17), 51 (27), 50 (21).                                                                                                                                                                                                                                                                                                                                                                                                                                                                                        |                                                                                                                         |       |                  |            |

|                                                                                                                                                                                                                                                                                                                                                                                                                                                                                                                                                                                                                                                                                                       |                                                                              |       |       |            |
|-------------------------------------------------------------------------------------------------------------------------------------------------------------------------------------------------------------------------------------------------------------------------------------------------------------------------------------------------------------------------------------------------------------------------------------------------------------------------------------------------------------------------------------------------------------------------------------------------------------------------------------------------------------------------------------------------------|------------------------------------------------------------------------------|-------|-------|------------|
| Chem. Name                                                                                                                                                                                                                                                                                                                                                                                                                                                                                                                                                                                                                                                                                            | Butyl (E)-3-(thiophen-2-yl)acrylate (8eb)                                    |       |       |            |
| Lit. Ref.                                                                                                                                                                                                                                                                                                                                                                                                                                                                                                                                                                                                                                                                                             | M. Oberholzera, C. M. Frech, <i>Green Chem.</i> <b>2013</b> , 15, 1678–1686. |       |       |            |
| <div><div><div>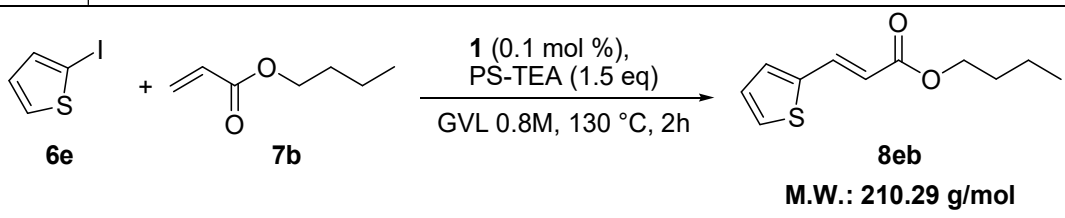</div><div><p><b>6e</b> + <b>7b</b> <math>\xrightarrow[\text{GVL 0.8M, 130 } ^\circ\text{C, 2h}]{\text{1 (0.1 mol \%), PS-TEA (1.5 eq)}}</math> <b>8eb</b></p><p><b>M.W.: 210.29 g/mol</b></p></div></div></div>                                                                                                                                                                                                                                                                                                                                                                                     |                                                                              |       |       |            |
| METHOD:                                                                                                                                                                                                                                                                                                                                                                                                                                                                                                                                                                                                                                                                                               |                                                                              |       |       |            |
| In a 4 mL screw-capped vial equipped with a magnetic stirrer, catalyst <b>1</b> (2.3 wt%, 0.0046 g, 0.1 mol%), diethylaminomethyl-polystyrene (~3.2 mmol/g, 0.469 g, 1.5 equiv), GVL (0.8 M, 1.25 mL), 2-iodothiophene ( <b>6e</b> ) (0.214 g, 113 $\mu\text{L}$ , 1 mmol), and butyl acrylate ( <b>7b</b> ) (0.157 g, 174 $\mu\text{L}$ , 1.2 mmol) were consecutively added and the resulting mixture was left under stirring at 130 $^\circ\text{C}$ . After 2 hours the catalyst and base were filtered off. The GVL was removed by using extraction work up method. Finally, butyl (E)-3-(thiophen-2-yl)acrylate ( <b>8eb</b> ) was obtained as a pale yellow oil (0.183 g, 87% isolated yield). |                                                                              |       |       |            |
| Mol Formula                                                                                                                                                                                                                                                                                                                                                                                                                                                                                                                                                                                                                                                                                           | C <sub>11</sub> H <sub>14</sub> O <sub>2</sub> S                             | m.p.  |       |            |
| Elemental Analysis: Calc.: C: 62.83; H: 6.71; S: 15.25; found: C: 62.84; H: 6.72; S: 15.24.                                                                                                                                                                                                                                                                                                                                                                                                                                                                                                                                                                                                           |                                                                              |       |       |            |
| <sup>1</sup> H NMR<br>400 MHz<br>CDCl <sub>3</sub>                                                                                                                                                                                                                                                                                                                                                                                                                                                                                                                                                                                                                                                    | $\delta$ value                                                               | No. H | Mult. | j value/Hz |
|                                                                                                                                                                                                                                                                                                                                                                                                                                                                                                                                                                                                                                                                                                       | 7.77                                                                         | 1     | d     | 16         |
|                                                                                                                                                                                                                                                                                                                                                                                                                                                                                                                                                                                                                                                                                                       | 7.37                                                                         | 1     | d     | 5.2        |
|                                                                                                                                                                                                                                                                                                                                                                                                                                                                                                                                                                                                                                                                                                       | 7.25-7.26                                                                    | 1     | m     |            |
|                                                                                                                                                                                                                                                                                                                                                                                                                                                                                                                                                                                                                                                                                                       | 7.03-7.06                                                                    | 1     | m     |            |
|                                                                                                                                                                                                                                                                                                                                                                                                                                                                                                                                                                                                                                                                                                       | 6.24                                                                         | 1     | d     | 15.6       |
|                                                                                                                                                                                                                                                                                                                                                                                                                                                                                                                                                                                                                                                                                                       | 4.19                                                                         | 2     | t     | 6.6        |
|                                                                                                                                                                                                                                                                                                                                                                                                                                                                                                                                                                                                                                                                                                       | 1.64-1.72                                                                    | 2     | m     |            |
|                                                                                                                                                                                                                                                                                                                                                                                                                                                                                                                                                                                                                                                                                                       | 1.38-1.48                                                                    | 2     | m     |            |
|                                                                                                                                                                                                                                                                                                                                                                                                                                                                                                                                                                                                                                                                                                       | 0.96                                                                         | 3     | t     | 7.4        |
| <sup>13</sup> C NMR (100.6 MHz, CDCl <sub>3</sub> ) $\delta$ : 167.1, 139.7, 137.1, 130.9, 128.5, 128.2, 117.2, 64.6, 30.9, 19.3, 13.9.                                                                                                                                                                                                                                                                                                                                                                                                                                                                                                                                                               |                                                                              |       |       |            |
| GC-EIMS (m/z, %): 210 (M <sup>+</sup> , 40), 154 (93), 137 (100), 121 (30), 110 (34), 109 (61), 108 (16), 65 (36).                                                                                                                                                                                                                                                                                                                                                                                                                                                                                                                                                                                    |                                                                              |       |       |            |

|                                                                                                                                                                                                                                                                                                                                                                                                                                                                                                                                                                                                                                                                |                                                                                     |       |                            |            |
|----------------------------------------------------------------------------------------------------------------------------------------------------------------------------------------------------------------------------------------------------------------------------------------------------------------------------------------------------------------------------------------------------------------------------------------------------------------------------------------------------------------------------------------------------------------------------------------------------------------------------------------------------------------|-------------------------------------------------------------------------------------|-------|----------------------------|------------|
| Chem. Name                                                                                                                                                                                                                                                                                                                                                                                                                                                                                                                                                                                                                                                     | (E)-stylbene (10aa)                                                                 |       |                            |            |
| Lit. Ref.                                                                                                                                                                                                                                                                                                                                                                                                                                                                                                                                                                                                                                                      | Z. Zhang, Z. Zha, C. Gan, C. Pan, Y. Zhou, Z. Wang, M-M. Zhou, <i>J. Org. Chem.</i> |       |                            |            |
| <div>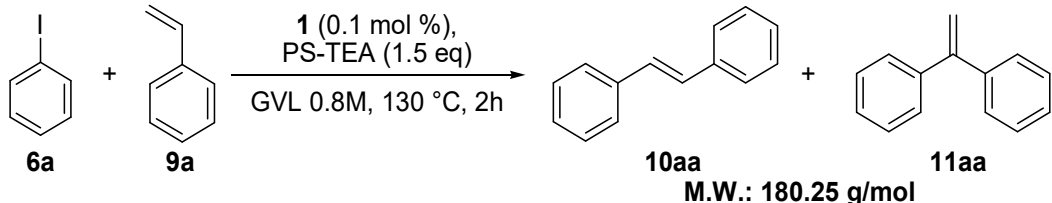</div>                                                                                                                                                                                                                                                                                                                                                                                                                                                                                                                                                                  |                                                                                     |       |                            |            |
| METHOD:                                                                                                                                                                                                                                                                                                                                                                                                                                                                                                                                                                                                                                                        |                                                                                     |       |                            |            |
| In a 4 mL screw-capped vial equipped with a magnetic stirrer, catalyst <b>1</b> (2.3 wt%, 0.0046 g, 0.1 mol%), diethylaminomethyl-polystyrene (~3.2 mmol/g, 0.469 g, 1.5 equiv), GVL (0.8 M, 1.25 mL), iodobenzene ( <b>6a</b> ) (0.208 g, 114 $\mu\text{L}$ , 1 mmol), and styrene ( <b>9a</b> ) (0.128 g, 141 $\mu\text{L}$ , 1.2 mmol) were consecutively added and the resulting mixture was left under stirring at 130 $^{\circ}\text{C}$ . After 2 hours the catalyst and base were filtered off and the product was isolated by precipitation work up method. A 93:7 mixture of <b>10aa</b> and <b>11aa</b> was obtained (0.153 g, 85% isolated yield). |                                                                                     |       |                            |            |
| Mol Formula                                                                                                                                                                                                                                                                                                                                                                                                                                                                                                                                                                                                                                                    | C <sub>14</sub> H <sub>12</sub>                                                     | m.p.  | 126-128 $^{\circ}\text{C}$ |            |
| Elemental Analysis: Calc.: C: 93.29; H: 6.71; found: C: 93.32; H: 6.72.                                                                                                                                                                                                                                                                                                                                                                                                                                                                                                                                                                                        |                                                                                     |       |                            |            |
| <sup>1</sup> H NMR<br>400 MHz<br>CDCl <sub>3</sub>                                                                                                                                                                                                                                                                                                                                                                                                                                                                                                                                                                                                             | $\delta$ value                                                                      | No. H | Mult.                      | j value/Hz |
|                                                                                                                                                                                                                                                                                                                                                                                                                                                                                                                                                                                                                                                                | 7.53                                                                                | 4     | <i>m</i>                   |            |
|                                                                                                                                                                                                                                                                                                                                                                                                                                                                                                                                                                                                                                                                | 7.38                                                                                | 4     | <i>m</i>                   |            |
|                                                                                                                                                                                                                                                                                                                                                                                                                                                                                                                                                                                                                                                                | 7.28                                                                                | 2     | <i>m</i>                   |            |
|                                                                                                                                                                                                                                                                                                                                                                                                                                                                                                                                                                                                                                                                | 7.13                                                                                | 2     | <i>s</i>                   |            |
| <sup>13</sup> C NMR (100.6 MHz, CDCl <sub>3</sub> ) $\delta$ : 137.5, 128.8, 127.8, 126.7.                                                                                                                                                                                                                                                                                                                                                                                                                                                                                                                                                                     |                                                                                     |       |                            |            |
| GC-EIMS (m/z, %): 181 (40), 180 (M <sup>+</sup> , 100), 179 (100), 178 (91), 177 (24), 176 (27), 166 (19), 165 (86), 152 (35), 151 (17), 102 (23), 89 (46), 77 (19), 76 (33), 63 (18), 51 (23).                                                                                                                                                                                                                                                                                                                                                                                                                                                                |                                                                                     |       |                            |            |



|                                                                                                                                                                                                                                                                                                                                                                                                                                                                                                                                                                                                                                                                     |                                                                                               |              |                      |                   |
|---------------------------------------------------------------------------------------------------------------------------------------------------------------------------------------------------------------------------------------------------------------------------------------------------------------------------------------------------------------------------------------------------------------------------------------------------------------------------------------------------------------------------------------------------------------------------------------------------------------------------------------------------------------------|-----------------------------------------------------------------------------------------------|--------------|----------------------|-------------------|
| <b>Chem. Name</b>                                                                                                                                                                                                                                                                                                                                                                                                                                                                                                                                                                                                                                                   | <b>(E)-1-chloro-4-styrylbenzene (10ab)</b>                                                    |              |                      |                   |
| <b>Lit. Ref.</b>                                                                                                                                                                                                                                                                                                                                                                                                                                                                                                                                                                                                                                                    | N. Iranpoor, H. Firouzabadi, R. Azadi, <i>Eur. J. Org. Chem.</i> <b>2007</b> , 13, 2197-2201. |              |                      |                   |
| <div>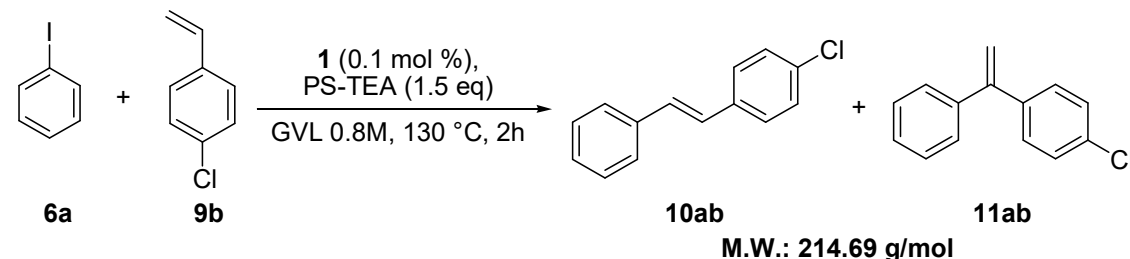</div>                                                                                                                                                                                                                                                                                                                                                                                                                                                                                                                                                                       |                                                                                               |              |                      |                   |
| <b>METHOD:</b><br>In a 4 mL screw-capped vial equipped with a magnetic stirrer, catalyst <b>1</b> (2.3 wt%, 0.0046 g, 0.1 mol%), diethylaminomethyl-polystyrene (~3.2 mmol/g, 0.469 g, 1.5 equiv), GVL (0.8 M, 1.25 mL), iodobenzene ( <b>6a</b> ) (0.208 g, 114 $\mu$ L, 1 mmol), and 4-chlorostyrene ( <b>9b</b> ) (0.171 g, 148 $\mu$ L, 1.2 mmol) were consecutively added and the resulting mixture was left under stirring at 130 $^{\circ}$ C. After 2 hours the catalyst and base were filtered off and the product was isolated by precipitation work up method. A 94:6 mixture of <b>10ab</b> and <b>11ab</b> was obtained (0.186 g, 87% isolated yield). |                                                                                               |              |                      |                   |
| <b>Mol Formula</b>                                                                                                                                                                                                                                                                                                                                                                                                                                                                                                                                                                                                                                                  | C <sub>14</sub> H <sub>11</sub> Cl                                                            | <b>m.p.</b>  | 128-130 $^{\circ}$ C |                   |
| <b>Elemental Analysis:</b> Calc.: C: 78.32; H: 5.16; found: C: 78.31; H: 5.16.                                                                                                                                                                                                                                                                                                                                                                                                                                                                                                                                                                                      |                                                                                               |              |                      |                   |
| <b><sup>1</sup>H NMR</b><br><b>400 MHz</b><br><b>CDCl<sub>3</sub></b>                                                                                                                                                                                                                                                                                                                                                                                                                                                                                                                                                                                               | <b><math>\delta</math> value</b>                                                              | <b>No. H</b> | <b>Mult.</b>         | <b>j value/Hz</b> |
|                                                                                                                                                                                                                                                                                                                                                                                                                                                                                                                                                                                                                                                                     | 7.51                                                                                          | 2            | <i>d</i>             | 7.6               |
|                                                                                                                                                                                                                                                                                                                                                                                                                                                                                                                                                                                                                                                                     | 7.44                                                                                          | 2            | <i>d</i>             | 8.4               |
|                                                                                                                                                                                                                                                                                                                                                                                                                                                                                                                                                                                                                                                                     | 7.38                                                                                          | 2            | <i>d</i>             | 7.6               |
|                                                                                                                                                                                                                                                                                                                                                                                                                                                                                                                                                                                                                                                                     | 7.34                                                                                          | 2            | <i>m</i>             |                   |
|                                                                                                                                                                                                                                                                                                                                                                                                                                                                                                                                                                                                                                                                     | 7.27-7.31                                                                                     | 1            | <i>m</i>             |                   |
|                                                                                                                                                                                                                                                                                                                                                                                                                                                                                                                                                                                                                                                                     | 7.01-7.11                                                                                     | 2            | <i>m</i>             |                   |
| <b><sup>13</sup>C NMR (100.6 MHz, CDCl<sub>3</sub>) <math>\delta</math> :</b> 137.1, 136.0, 133.3, 129.5, 129.0, 129.0, 128.0, 127.8, 127.5, 126.7.                                                                                                                                                                                                                                                                                                                                                                                                                                                                                                                 |                                                                                               |              |                      |                   |
| <b>GC-EIMS (m/z, %):</b> 216 (76), 215 (45), 214 (M <sup>+</sup> , 97), 199 (18), 180 (41), 179 (55), 178 (100), 177 (53), 176 (53), 152 (32), 151 (26), 102 (16), 89 (61), 88 (30), 76 (55), 75 (23), 63 (18), 51 (19).                                                                                                                                                                                                                                                                                                                                                                                                                                            |                                                                                               |              |                      |                   |

|                                                                                                                                                                                                                                                                                                                                                                                                                                                                                                                                                                                                                                                                                                                              |                                                                                               |       |            |            |
|------------------------------------------------------------------------------------------------------------------------------------------------------------------------------------------------------------------------------------------------------------------------------------------------------------------------------------------------------------------------------------------------------------------------------------------------------------------------------------------------------------------------------------------------------------------------------------------------------------------------------------------------------------------------------------------------------------------------------|-----------------------------------------------------------------------------------------------|-------|------------|------------|
| Chem. Name                                                                                                                                                                                                                                                                                                                                                                                                                                                                                                                                                                                                                                                                                                                   | (E)-1-methyl-4-styrylbenzene (10ba)                                                           |       |            |            |
| Lit. Ref.                                                                                                                                                                                                                                                                                                                                                                                                                                                                                                                                                                                                                                                                                                                    | N. Iranpoor, H. Firouzabadi, R. Azadi, <i>Eur. J. Org. Chem.</i> <b>2007</b> , 13, 2197-2201. |       |            |            |
| <div><div><div><div>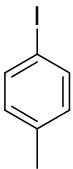</div><div>6b</div></div><div>+</div><div><div><div></div><div>9a</div></div><div><div><div>1 (0.1 mol %),<br/>PS-TEA (1.5 eq)</div><div>→</div></div><div><div>GVL 0.8M, 130 °C, 2h</div></div></div><div><div><div></div><div>10ba</div></div><div>+</div><div><div><div></div><div>11ba</div></div></div><div>M.W.: 194.28 g/mol</div></div></div></div></div> |                                                                                               |       |            |            |
| METHOD:                                                                                                                                                                                                                                                                                                                                                                                                                                                                                                                                                                                                                                                                                                                      |                                                                                               |       |            |            |
| In a 4 mL screw-capped vial equipped with a magnetic stirrer, catalyst <b>1</b> (2.3 wt%, 0.0046 g, 0.1 mol%), diethylaminomethyl-polystyrene (~3.2 mmol/g, 0.469 g, 1.5 equiv), GVL (0.8 M, 1.25 mL), 4-iodotoluene ( <b>6b</b> ) (0.220 gr, 1 mmol), and styrene ( <b>9a</b> ) (0.128 g, 141 μL, 1.2 mmol) were consecutively added and the resulting mixture was left under stirring at 130 °C. After 2 hours the catalyst and base were filtered off and the product was isolated by precipitation work up method. A 92:8 mixture of <b>10ba</b> and <b>11ba</b> was obtained (0.168 g, 86% isolated yield).                                                                                                             |                                                                                               |       |            |            |
| Mol Formula                                                                                                                                                                                                                                                                                                                                                                                                                                                                                                                                                                                                                                                                                                                  | C <sub>15</sub> H <sub>14</sub>                                                               | m.p.  | 120-122 °C |            |
| Elemental Analysis: Calc.: C: 92.74; H: 7.26; found: C: 92.69; H: 7.24.                                                                                                                                                                                                                                                                                                                                                                                                                                                                                                                                                                                                                                                      |                                                                                               |       |            |            |
| <sup>1</sup> H NMR<br>400 MHz<br>CDCl <sub>3</sub>                                                                                                                                                                                                                                                                                                                                                                                                                                                                                                                                                                                                                                                                           | δ value                                                                                       | No. H | Mult.      | j value/Hz |
|                                                                                                                                                                                                                                                                                                                                                                                                                                                                                                                                                                                                                                                                                                                              | 7.52                                                                                          | 2     | <i>d</i>   | 7.6        |
|                                                                                                                                                                                                                                                                                                                                                                                                                                                                                                                                                                                                                                                                                                                              | 7.43                                                                                          | 2     | <i>d</i>   | 8          |
|                                                                                                                                                                                                                                                                                                                                                                                                                                                                                                                                                                                                                                                                                                                              | 7.37                                                                                          | 2     | <i>m</i>   |            |
|                                                                                                                                                                                                                                                                                                                                                                                                                                                                                                                                                                                                                                                                                                                              | 7.24-7.28                                                                                     | 1     | <i>m</i>   |            |
|                                                                                                                                                                                                                                                                                                                                                                                                                                                                                                                                                                                                                                                                                                                              | 7.18                                                                                          | 2     | <i>d</i>   | 8          |
|                                                                                                                                                                                                                                                                                                                                                                                                                                                                                                                                                                                                                                                                                                                              | 7.04-7.14                                                                                     | 2     | <i>m</i>   |            |
|                                                                                                                                                                                                                                                                                                                                                                                                                                                                                                                                                                                                                                                                                                                              | 2.38                                                                                          | 3     | <i>s</i>   |            |
| <sup>13</sup> C NMR (100.6 MHz, CDCl <sub>3</sub> ) δ : 137.7, 137.7, 134.7, 129.5, 128.8, 128.8, 127.8, 127.5, 126.6, 126.5, 21.4.                                                                                                                                                                                                                                                                                                                                                                                                                                                                                                                                                                                          |                                                                                               |       |            |            |
| GC-EIMS (m/z, %): 195 (31), 194 (M <sup>+</sup> , 97), 193 (46), 180 (29), 179 (100), 178 (94), 165 (27), 152 (19), 115 (26), 89 (17).                                                                                                                                                                                                                                                                                                                                                                                                                                                                                                                                                                                       |                                                                                               |       |            |            |



|                                                                                                                                                                                                                                                                                                                                                                                                                                                                                                                                                                                                                                     |                                                                                             |       |           |            |
|-------------------------------------------------------------------------------------------------------------------------------------------------------------------------------------------------------------------------------------------------------------------------------------------------------------------------------------------------------------------------------------------------------------------------------------------------------------------------------------------------------------------------------------------------------------------------------------------------------------------------------------|---------------------------------------------------------------------------------------------|-------|-----------|------------|
| Chem. Name                                                                                                                                                                                                                                                                                                                                                                                                                                                                                                                                                                                                                          | (E)-1-methoxy-4-styrylbenzene (10ca)                                                        |       |           |            |
| Lit. Ref.                                                                                                                                                                                                                                                                                                                                                                                                                                                                                                                                                                                                                           | J. D. Senra, L. F. B. Malta, A. L. F. Souza, L. C. S. Aguiar, O. A. C. Antunes, <i>Adv.</i> |       |           |            |
| <p>Reaction scheme showing the synthesis of (E)-1-methoxy-4-styrylbenzene (10ca) and (E)-1-methoxy-4-phenylstyrene (11ca) from 4-iodoanisole (6c) and styrene (9a). The reaction conditions are: catalyst <b>1</b> (0.1 mol %), PS-TEA (1.5 eq), GVL 0.8M, 130 °C, 2h. The molecular weight of 10ca is 210.28 g/mol.</p>                                                                                                                                                                                                                                                                                                            |                                                                                             |       |           |            |
| METHOD:                                                                                                                                                                                                                                                                                                                                                                                                                                                                                                                                                                                                                             |                                                                                             |       |           |            |
| <p>In a 4 mL screw-capped vial equipped with a magnetic stirrer, catalyst <b>1</b> (2.3 wt%, 0.0046 g, 0.1 mol%), diethylaminomethyl-polystyrene (~3.2 mmol/g, 0.469 g, 1.5 equiv), GVL (0.8 M, 1.25 mL), 4-iodoanisole (<b>6c</b>) (0.239 gr, 1 mmol), and styrene (<b>9a</b>) (0.128 g, 141 <math>\mu</math>L, 1.2 mmol) were consecutively added and the resulting mixture was left under stirring at 130 °C. After 2 hours the catalyst and base were filtered off and the product was isolated by precipitation work up method. A 90:10 mixture of <b>10ca</b> and <b>11ca</b> was obtained (0.187 g, 89% isolated yield).</p> |                                                                                             |       |           |            |
| Mol Formula                                                                                                                                                                                                                                                                                                                                                                                                                                                                                                                                                                                                                         | C <sub>15</sub> H <sub>14</sub> O                                                           | m.p.  | 136-138°C |            |
| Elemental Analysis: Calc.: C: 85.68; H: 6.71; found: C: 85.67; H: 6.70.                                                                                                                                                                                                                                                                                                                                                                                                                                                                                                                                                             |                                                                                             |       |           |            |
| <sup>1</sup> H NMR<br>400 MHz<br>CDCl <sub>3</sub>                                                                                                                                                                                                                                                                                                                                                                                                                                                                                                                                                                                  | $\delta$ value                                                                              | No. H | Mult.     | j value/Hz |
|                                                                                                                                                                                                                                                                                                                                                                                                                                                                                                                                                                                                                                     | 7.51-7.45                                                                                   | 4     | <i>m</i>  |            |
|                                                                                                                                                                                                                                                                                                                                                                                                                                                                                                                                                                                                                                     | 7.35                                                                                        | 2     | <i>t</i>  | 7.6        |
|                                                                                                                                                                                                                                                                                                                                                                                                                                                                                                                                                                                                                                     | 7.23                                                                                        | 1     | <i>m</i>  |            |
|                                                                                                                                                                                                                                                                                                                                                                                                                                                                                                                                                                                                                                     | 7.03                                                                                        | 2     | <i>m</i>  |            |
|                                                                                                                                                                                                                                                                                                                                                                                                                                                                                                                                                                                                                                     | 6.91                                                                                        | 2     | <i>d</i>  | 8.8        |
|                                                                                                                                                                                                                                                                                                                                                                                                                                                                                                                                                                                                                                     | 3.84                                                                                        | 3     | <i>s</i>  |            |
| <sup>13</sup> C NMR (100.6 MHz, CDCl <sub>3</sub> ) $\delta$ : 159.4, 137.8, 130.3, 128.8, 128.4, 127.9, 127.4, 126.8, 126.4, 114.3, 55.5.                                                                                                                                                                                                                                                                                                                                                                                                                                                                                          |                                                                                             |       |           |            |
| GC-EIMS (m/z, %): 211 (56), 210 (M <sup>+</sup> , 100), 209 (56), 195 (62), 194 (22), 179 (36), 178 (26), 177 (17), 167 (77), 166 (43), 165 (87), 152 (62), 115 (20), 89 (22).                                                                                                                                                                                                                                                                                                                                                                                                                                                      |                                                                                             |       |           |            |



|                                                                                                                                                                                                                                                                                                                                                                                                                                                                                                                                                                                                                             |                                                                                               |       |           |            |
|-----------------------------------------------------------------------------------------------------------------------------------------------------------------------------------------------------------------------------------------------------------------------------------------------------------------------------------------------------------------------------------------------------------------------------------------------------------------------------------------------------------------------------------------------------------------------------------------------------------------------------|-----------------------------------------------------------------------------------------------|-------|-----------|------------|
| Chem. Name                                                                                                                                                                                                                                                                                                                                                                                                                                                                                                                                                                                                                  | (E)-1-(4-styrylphenyl)ethan-1-one (10da)                                                      |       |           |            |
| Lit. Ref.                                                                                                                                                                                                                                                                                                                                                                                                                                                                                                                                                                                                                   | N. Iranpoor, H. Firouzabadi, R. Azadi, <i>Eur. J. Org. Chem.</i> <b>2007</b> , 13, 2197-2201. |       |           |            |
| <div><p style="text-align: center;"><b>10da</b>                      <b>11da</b><br/><b>M.W.: 222.29 g/mol</b></p></div>                                                                                                                                                                                                                                                                                                                                                                                                                                                                                                    |                                                                                               |       |           |            |
| METHOD:                                                                                                                                                                                                                                                                                                                                                                                                                                                                                                                                                                                                                     |                                                                                               |       |           |            |
| In a 4 mL screw-capped vial equipped with a magnetic stirrer, catalyst <b>1</b> (2.3 wt%, 0.0046 g, 0.1 mol%), diethylaminomethyl-polystyrene (~3.2 mmol/g, 0.469 g, 1.5 equiv), GVL (0.8 M, 1.25 mL), 4'-iodoacetophenone ( <b>6d</b> ) (0.251 gr, 1 mmol), and styrene ( <b>9a</b> ) (0.128 g, 141 $\mu$ L, 1.2 mmol) were consecutively added and the resulting mixture was left under stirring at 130 °C. After 2 hours the catalyst and base were filtered off and the product was isolated by precipitation work up method. A 94:6 mixture of <b>10da</b> and <b>11da</b> was obtained (0.207 g, 93% isolated yield). |                                                                                               |       |           |            |
| Mol Formula                                                                                                                                                                                                                                                                                                                                                                                                                                                                                                                                                                                                                 | C <sub>16</sub> H <sub>14</sub> O                                                             | m.p.  | 140-142°C |            |
| Elemental Analysis: Calc.: C: 86.45; H: 6.35; found: C: 86.42; H: 6.34.                                                                                                                                                                                                                                                                                                                                                                                                                                                                                                                                                     |                                                                                               |       |           |            |
| <sup>1</sup> H NMR<br>400 MHz<br>CDCl <sub>3</sub>                                                                                                                                                                                                                                                                                                                                                                                                                                                                                                                                                                          | $\delta$ value                                                                                | No. H | Mult.     | j value/Hz |
|                                                                                                                                                                                                                                                                                                                                                                                                                                                                                                                                                                                                                             | 7.96                                                                                          | 2     | <i>d</i>  | 8.4        |
|                                                                                                                                                                                                                                                                                                                                                                                                                                                                                                                                                                                                                             | 7.59                                                                                          | 2     | <i>d</i>  | 8          |
|                                                                                                                                                                                                                                                                                                                                                                                                                                                                                                                                                                                                                             | 7.54                                                                                          | 2     | <i>d</i>  | 7.6        |
|                                                                                                                                                                                                                                                                                                                                                                                                                                                                                                                                                                                                                             | 7.39                                                                                          | 2     | <i>m</i>  |            |
|                                                                                                                                                                                                                                                                                                                                                                                                                                                                                                                                                                                                                             | 7.30-7.32                                                                                     | 1     | <i>m</i>  |            |
|                                                                                                                                                                                                                                                                                                                                                                                                                                                                                                                                                                                                                             | 7.21-7.28                                                                                     | 1     | <i>m</i>  |            |
|                                                                                                                                                                                                                                                                                                                                                                                                                                                                                                                                                                                                                             | 7.11-7.16                                                                                     | 1     | <i>m</i>  |            |
|                                                                                                                                                                                                                                                                                                                                                                                                                                                                                                                                                                                                                             | 2.61                                                                                          | 3     | <i>s</i>  |            |
| <sup>13</sup> C NMR (100.6 MHz, CDCl <sub>3</sub> ) $\delta$ : 197.5, 142.2, 136.8, 136.1, 131.6, 129.0, 129.0, 128.5, 127.6, 127.0, 126.7, 26.7.                                                                                                                                                                                                                                                                                                                                                                                                                                                                           |                                                                                               |       |           |            |
| GC-EIMS (m/z, %): 223 (27), 222 (M <sup>+</sup> , 89), 208 (38), 207 (100), 179 (52), 178 (89), 177 (25), 176 (26), 152 (23), 89 (21).                                                                                                                                                                                                                                                                                                                                                                                                                                                                                      |                                                                                               |       |           |            |

|                                                                                                                                                                                                                                                                                                                                                                                                                                                                                                                                                                                                                        |                                                                                                  |       |          |            |
|------------------------------------------------------------------------------------------------------------------------------------------------------------------------------------------------------------------------------------------------------------------------------------------------------------------------------------------------------------------------------------------------------------------------------------------------------------------------------------------------------------------------------------------------------------------------------------------------------------------------|--------------------------------------------------------------------------------------------------|-------|----------|------------|
| Chem. Name                                                                                                                                                                                                                                                                                                                                                                                                                                                                                                                                                                                                             | (E)-1-(4-(4-chlorostyryl)phenyl)ethan-1-one (10db)                                               |       |          |            |
| Lit. Ref.                                                                                                                                                                                                                                                                                                                                                                                                                                                                                                                                                                                                              | P. K. Suganthi, R. N. Prabhu, V. S. Sridevi, <i>Tetrahed. Lett.</i> <b>2013</b> , 54, 5695-5698. |       |          |            |
| <div>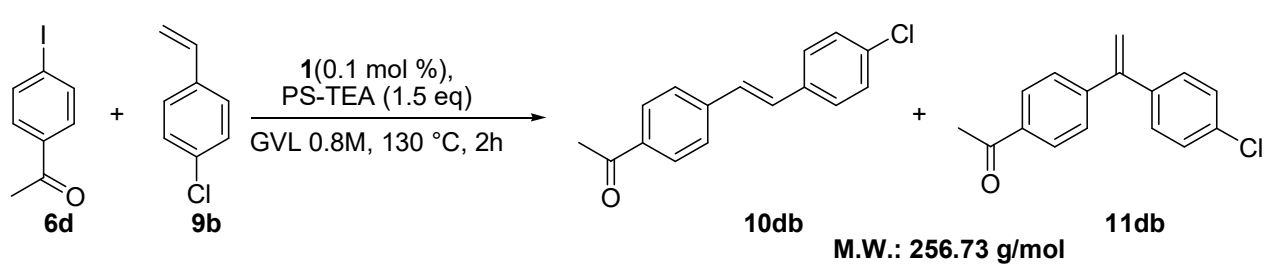</div> <p style="text-align: center;"><b>M.W.: 256.73 g/mol</b></p>                                                                                                                                                                                                                                                                                                                                                                                                                                                             |                                                                                                  |       |          |            |
| METHOD:                                                                                                                                                                                                                                                                                                                                                                                                                                                                                                                                                                                                                |                                                                                                  |       |          |            |
| In a 4 mL screw-capped vial equipped with a magnetic stirrer, catalyst <b>1</b> (2.3 wt%, 0.0046 g, 0.1 mol%), diethylaminomethyl-polystyrene (~3.2 mmol/g, 0.469 g, 1.5 equiv), GVL (0.8 M, 1.25 mL), 4'-iodoacetophenone ( <b>6d</b> ) (0.251 gr, 1 mmol), and 4-chlorostyrene ( <b>9b</b> ) (0.171 g, 1.2 mmol) were consecutively added and the resulting mixture was left under stirring at 130 °C. After 2 hours the catalyst and base were filtered off and the product was isolated by precipitation work up method. A 95:5 mixture of <b>10db</b> and <b>11db</b> was obtained (0.229 g, 89% isolated yield). |                                                                                                  |       |          |            |
| Mol Formula                                                                                                                                                                                                                                                                                                                                                                                                                                                                                                                                                                                                            | C <sub>16</sub> H <sub>13</sub> ClO                                                              |       | m.p.     | 138-140°C  |
| Elemental Analysis: Calc.: C: 74.86; H: 5.10; found: C: 74.88; H: 5.07.                                                                                                                                                                                                                                                                                                                                                                                                                                                                                                                                                |                                                                                                  |       |          |            |
| <sup>1</sup> H NMR<br>400 MHz<br>CDCl <sub>3</sub>                                                                                                                                                                                                                                                                                                                                                                                                                                                                                                                                                                     | δ value                                                                                          | No. H | Mult.    | j value/Hz |
|                                                                                                                                                                                                                                                                                                                                                                                                                                                                                                                                                                                                                        | 7.95                                                                                             | 2     | <i>d</i> | 8.4        |
|                                                                                                                                                                                                                                                                                                                                                                                                                                                                                                                                                                                                                        | 7.57                                                                                             | 2     | <i>d</i> | 8.4        |
|                                                                                                                                                                                                                                                                                                                                                                                                                                                                                                                                                                                                                        | 7.46                                                                                             | 2     | <i>d</i> | 8.4        |
|                                                                                                                                                                                                                                                                                                                                                                                                                                                                                                                                                                                                                        | 7.35                                                                                             | 2     | <i>d</i> | 8.4        |
|                                                                                                                                                                                                                                                                                                                                                                                                                                                                                                                                                                                                                        | 7.07-7.19                                                                                        | 2     | <i>m</i> |            |
|                                                                                                                                                                                                                                                                                                                                                                                                                                                                                                                                                                                                                        | 2.61                                                                                             | 3     | <i>s</i> |            |
| <sup>13</sup> C NMR (100.6 MHz, CDCl <sub>3</sub> ) δ : 197.7, 141.9, 136.4, 135.5, 134.2, 130.3, 129.2, 129.1, 128.3, 128.2, 126.8, 26.8.                                                                                                                                                                                                                                                                                                                                                                                                                                                                             |                                                                                                  |       |          |            |
| GC-EIMS (m/z, %): 258 (35), 257 (31), 256 (M <sup>+</sup> , 91), 243 (75), 242 (45), 241 (100), 179 (23), 178 (88), 177 (40), 176 (55), 152 (24), 151 (22), 89 (20), 88 (29).                                                                                                                                                                                                                                                                                                                                                                                                                                          |                                                                                                  |       |          |            |

|                                                                                                                                                                                                                                                                                                                                                                                                                                                                                                                                                                                                                                                                                           |                                                                                                               |       |           |            |
|-------------------------------------------------------------------------------------------------------------------------------------------------------------------------------------------------------------------------------------------------------------------------------------------------------------------------------------------------------------------------------------------------------------------------------------------------------------------------------------------------------------------------------------------------------------------------------------------------------------------------------------------------------------------------------------------|---------------------------------------------------------------------------------------------------------------|-------|-----------|------------|
| Chem. Name                                                                                                                                                                                                                                                                                                                                                                                                                                                                                                                                                                                                                                                                                | (E)-2-(2-phenylethenyl)thiophene (10ea)                                                                       |       |           |            |
| Lit. Ref.                                                                                                                                                                                                                                                                                                                                                                                                                                                                                                                                                                                                                                                                                 | S. Fu, N.-Y. Chen, X. Liu, Z. Shao, S.-P. Luo, Q. Liu, <i>J. Am. Chem. Soc.</i> <b>2016</b> , 138, 8588-8594. |       |           |            |
| <div><div><div><div><div>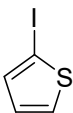</div><div>6e</div></div><div><div></div><div>9a</div></div></div><div><div><div>1 (0.1 mol %),<br/>PS-TEA (1.5 eq)</div><div>→</div><div>GVL 0.8M, 130 °C, 2h</div></div><div><div><div><div></div><div>10ea</div></div><div><div></div><div>11ea</div></div></div><div>M.W.: 186.27 g/mol</div></div></div></div></div> |                                                                                                               |       |           |            |
| METHOD:                                                                                                                                                                                                                                                                                                                                                                                                                                                                                                                                                                                                                                                                                   |                                                                                                               |       |           |            |
| In a 4 mL screw-capped vial equipped with a magnetic stirrer, catalyst <b>1</b> (2.3 wt%, 0.0046 g, 0.1 mol%), diethylaminomethyl-polystyrene (~3.2 mmol/g, 0.469 g, 1.5 equiv), GVL (0.8 M, 1.25 mL), 2-iodothiophene ( <b>6e</b> ) (0.214 g, 113 μL, 1 mmol), and styrene ( <b>9a</b> ) (0.128 g, 141 μL, 1.2 mmol) were consecutively added and the resulting mixture was left under stirring at 130 °C. After 2 hours the catalyst and base were filtered off and the product was isolated by precipitation work up method. A 97:3 mixture of <b>10ea</b> and <b>11ea</b> was obtained (0.142 g, 76% isolated yield).                                                                 |                                                                                                               |       |           |            |
| Mol Formula                                                                                                                                                                                                                                                                                                                                                                                                                                                                                                                                                                                                                                                                               | C <sub>12</sub> H <sub>10</sub> S                                                                             | m.p.  | 110-112°C |            |
| Elemental Analysis: Calc.: C: 77.38; H: 5.41;S: 17.21; found: C: 77.41; H: 5.41; S:17.19.                                                                                                                                                                                                                                                                                                                                                                                                                                                                                                                                                                                                 |                                                                                                               |       |           |            |
| <sup>1</sup> H NMR<br>400 MHz<br>CDCl <sub>3</sub>                                                                                                                                                                                                                                                                                                                                                                                                                                                                                                                                                                                                                                        | δ value                                                                                                       | No. H | Mult.     | j value/Hz |
|                                                                                                                                                                                                                                                                                                                                                                                                                                                                                                                                                                                                                                                                                           | 7.47                                                                                                          | 2     | <i>d</i>  | 7.6        |
|                                                                                                                                                                                                                                                                                                                                                                                                                                                                                                                                                                                                                                                                                           | 7.35                                                                                                          | 2     | <i>t</i>  | 7.6        |
|                                                                                                                                                                                                                                                                                                                                                                                                                                                                                                                                                                                                                                                                                           | 7.19-7.27                                                                                                     | 3     | <i>m</i>  |            |
|                                                                                                                                                                                                                                                                                                                                                                                                                                                                                                                                                                                                                                                                                           | 7.07                                                                                                          | 1     | <i>d</i>  | 3.2        |
|                                                                                                                                                                                                                                                                                                                                                                                                                                                                                                                                                                                                                                                                                           | 6.99-7.02                                                                                                     | 1     | <i>m</i>  |            |
|                                                                                                                                                                                                                                                                                                                                                                                                                                                                                                                                                                                                                                                                                           | 6.93                                                                                                          | 1     | <i>d</i>  | 16.0       |
| <sup>13</sup> C NMR (100.6 MHz, CDCl <sub>3</sub> ) δ : 143.0, 137.0, 128.9, 128.5, 127.7, 126.4, 126.2, 124.5, 121.9.                                                                                                                                                                                                                                                                                                                                                                                                                                                                                                                                                                    |                                                                                                               |       |           |            |
| GC-EIMS (m/z, %): 187 (19), 186 (M <sup>+</sup> , 100), 185 (89), 184 (41), 171 (21), 153 (29), 152 (31), 141 (23), 115 (20).                                                                                                                                                                                                                                                                                                                                                                                                                                                                                                                                                             |                                                                                                               |       |           |            |





Methyl 3,3-bis(1H-imidazol-1-yl)propanoate

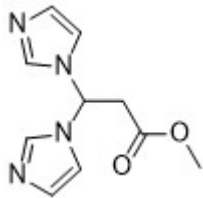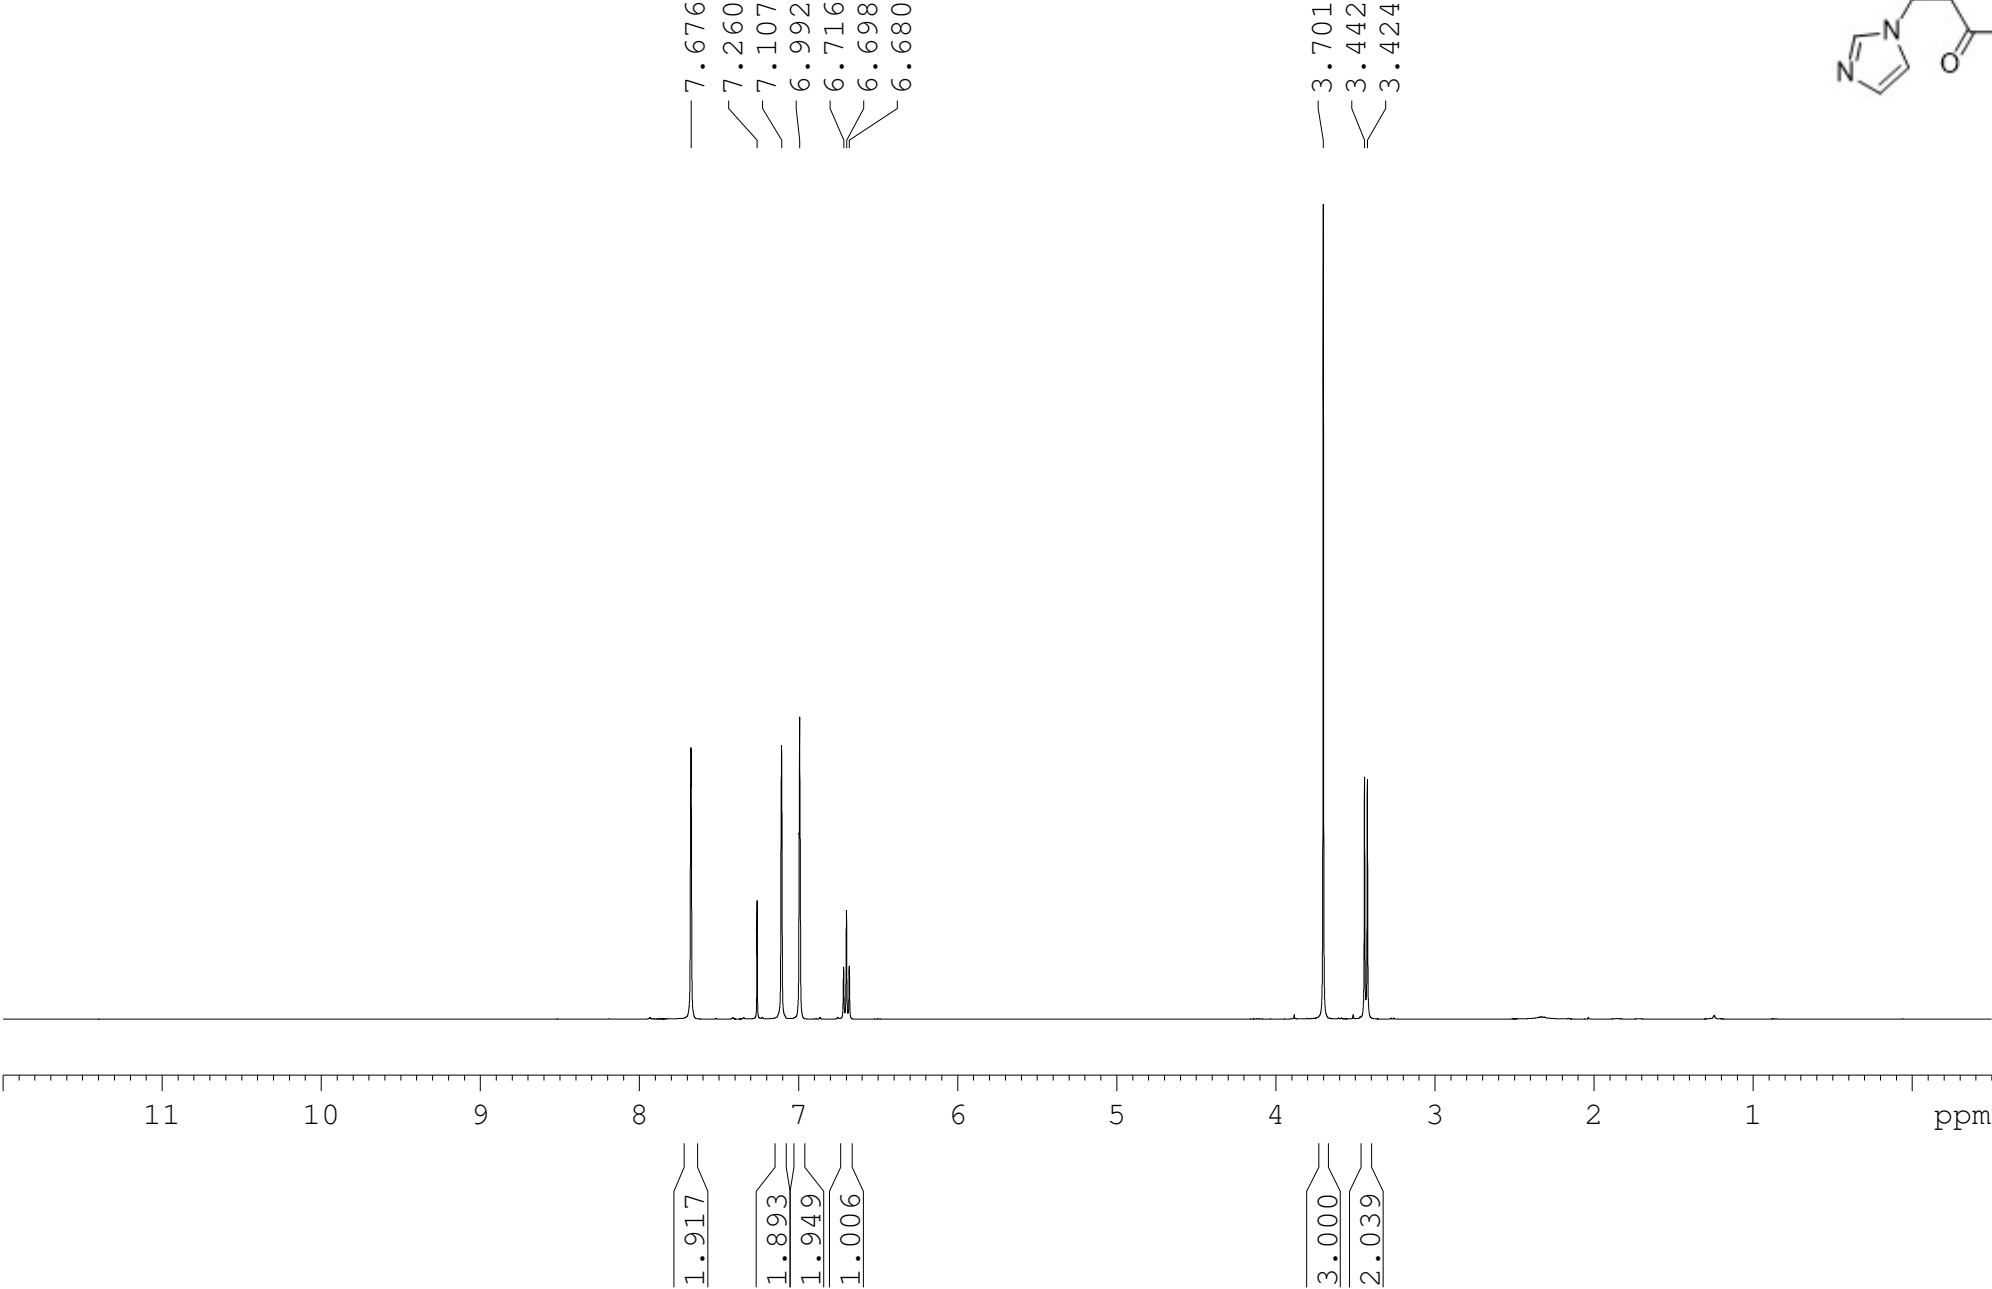

Methyl 3,3-bis(1H-imidazol-1-yl)propanoate

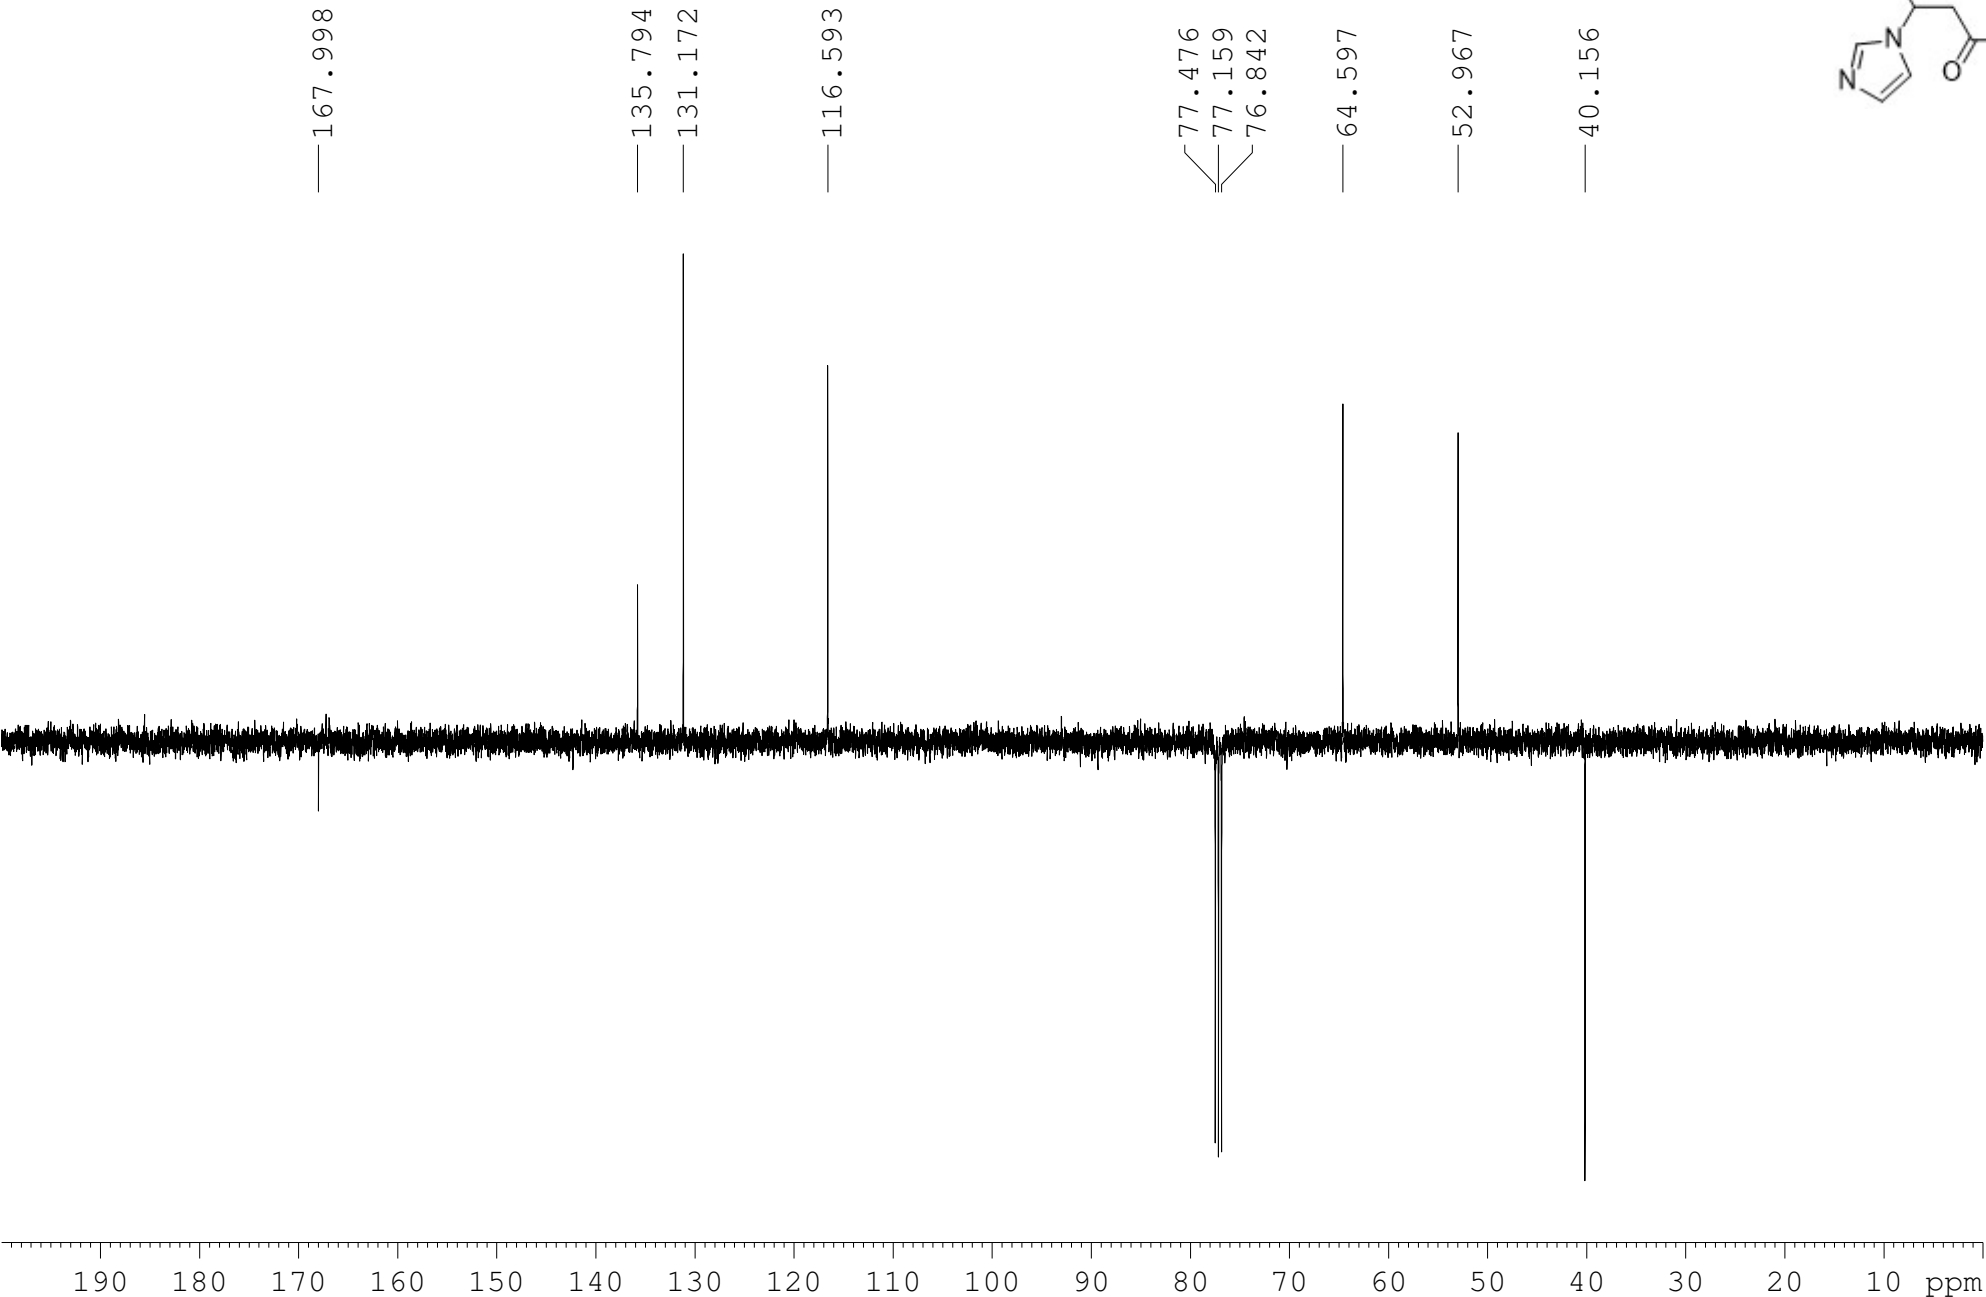

3,3-bis(1H-imidazol-1-yl)propan-1-ol (**3**)

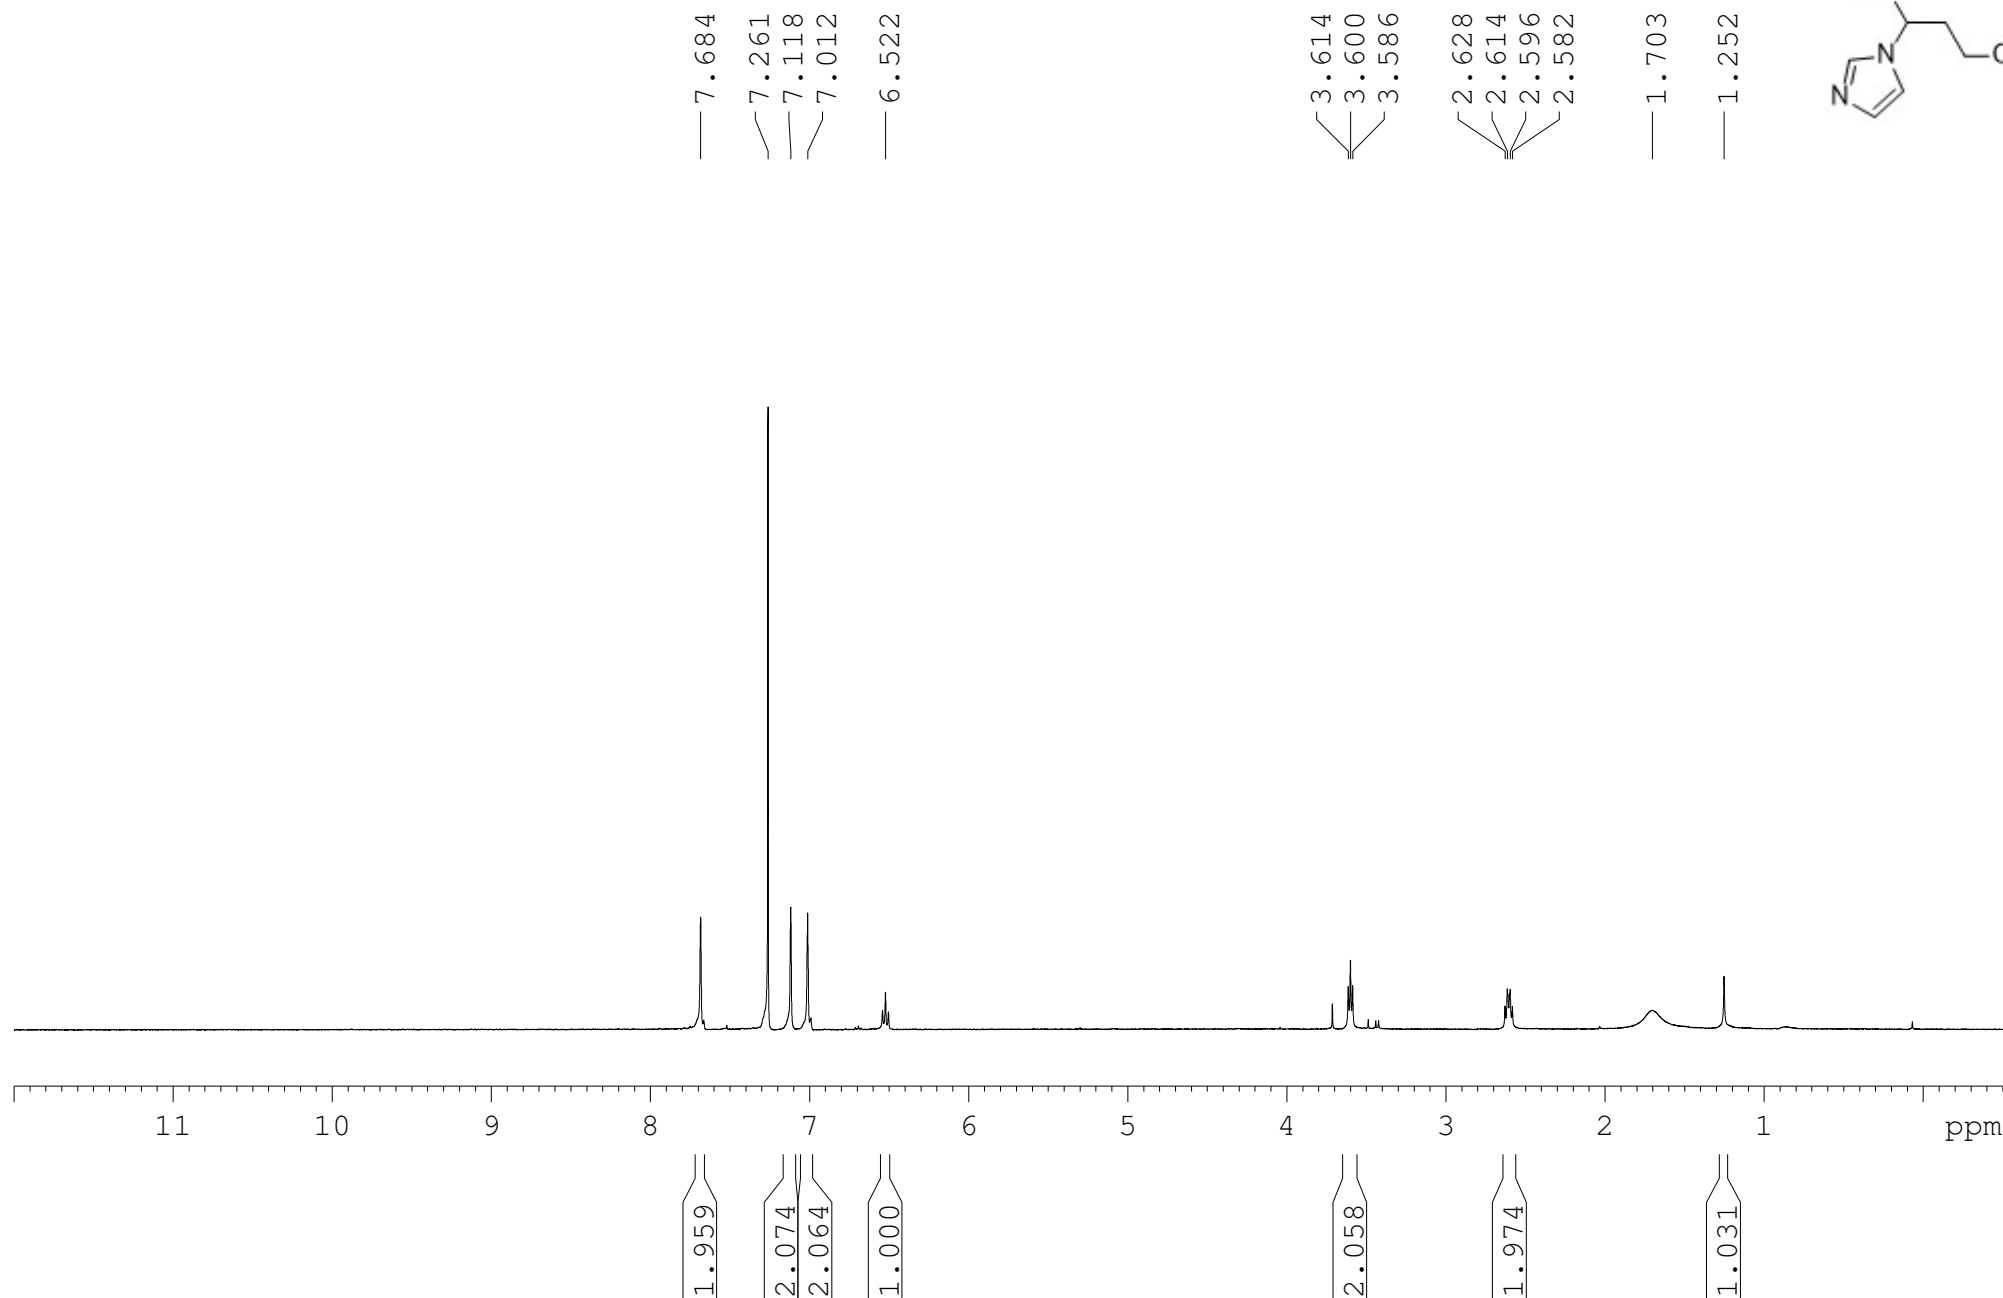

3,3-bis(1H-imidazol-1-yl)propan-1-ol (**3**)

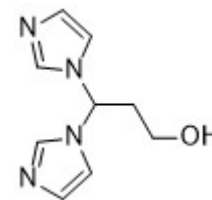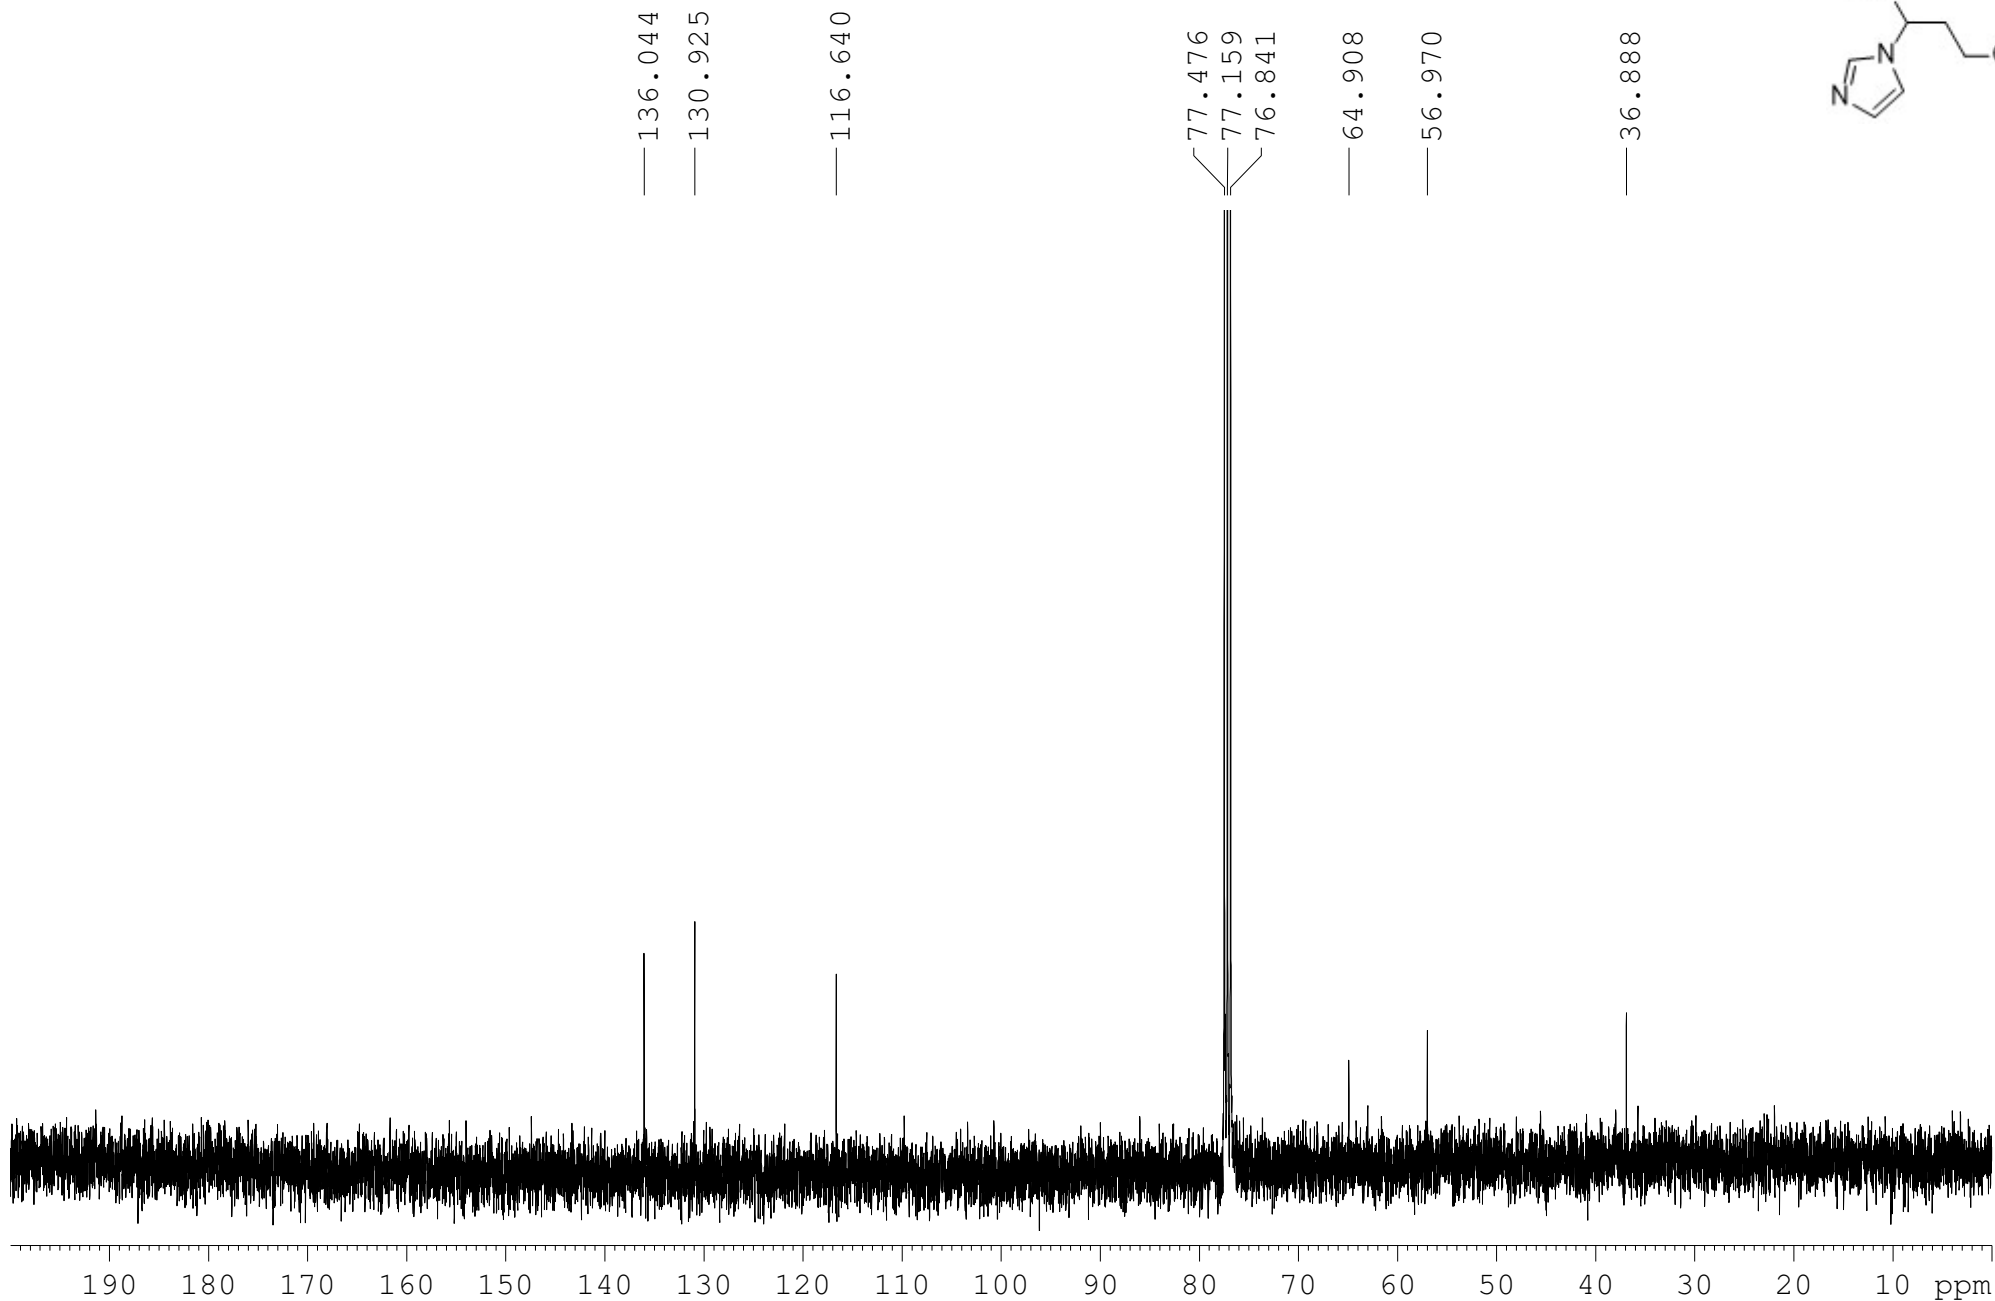

Methyl cinnamate (8aa)

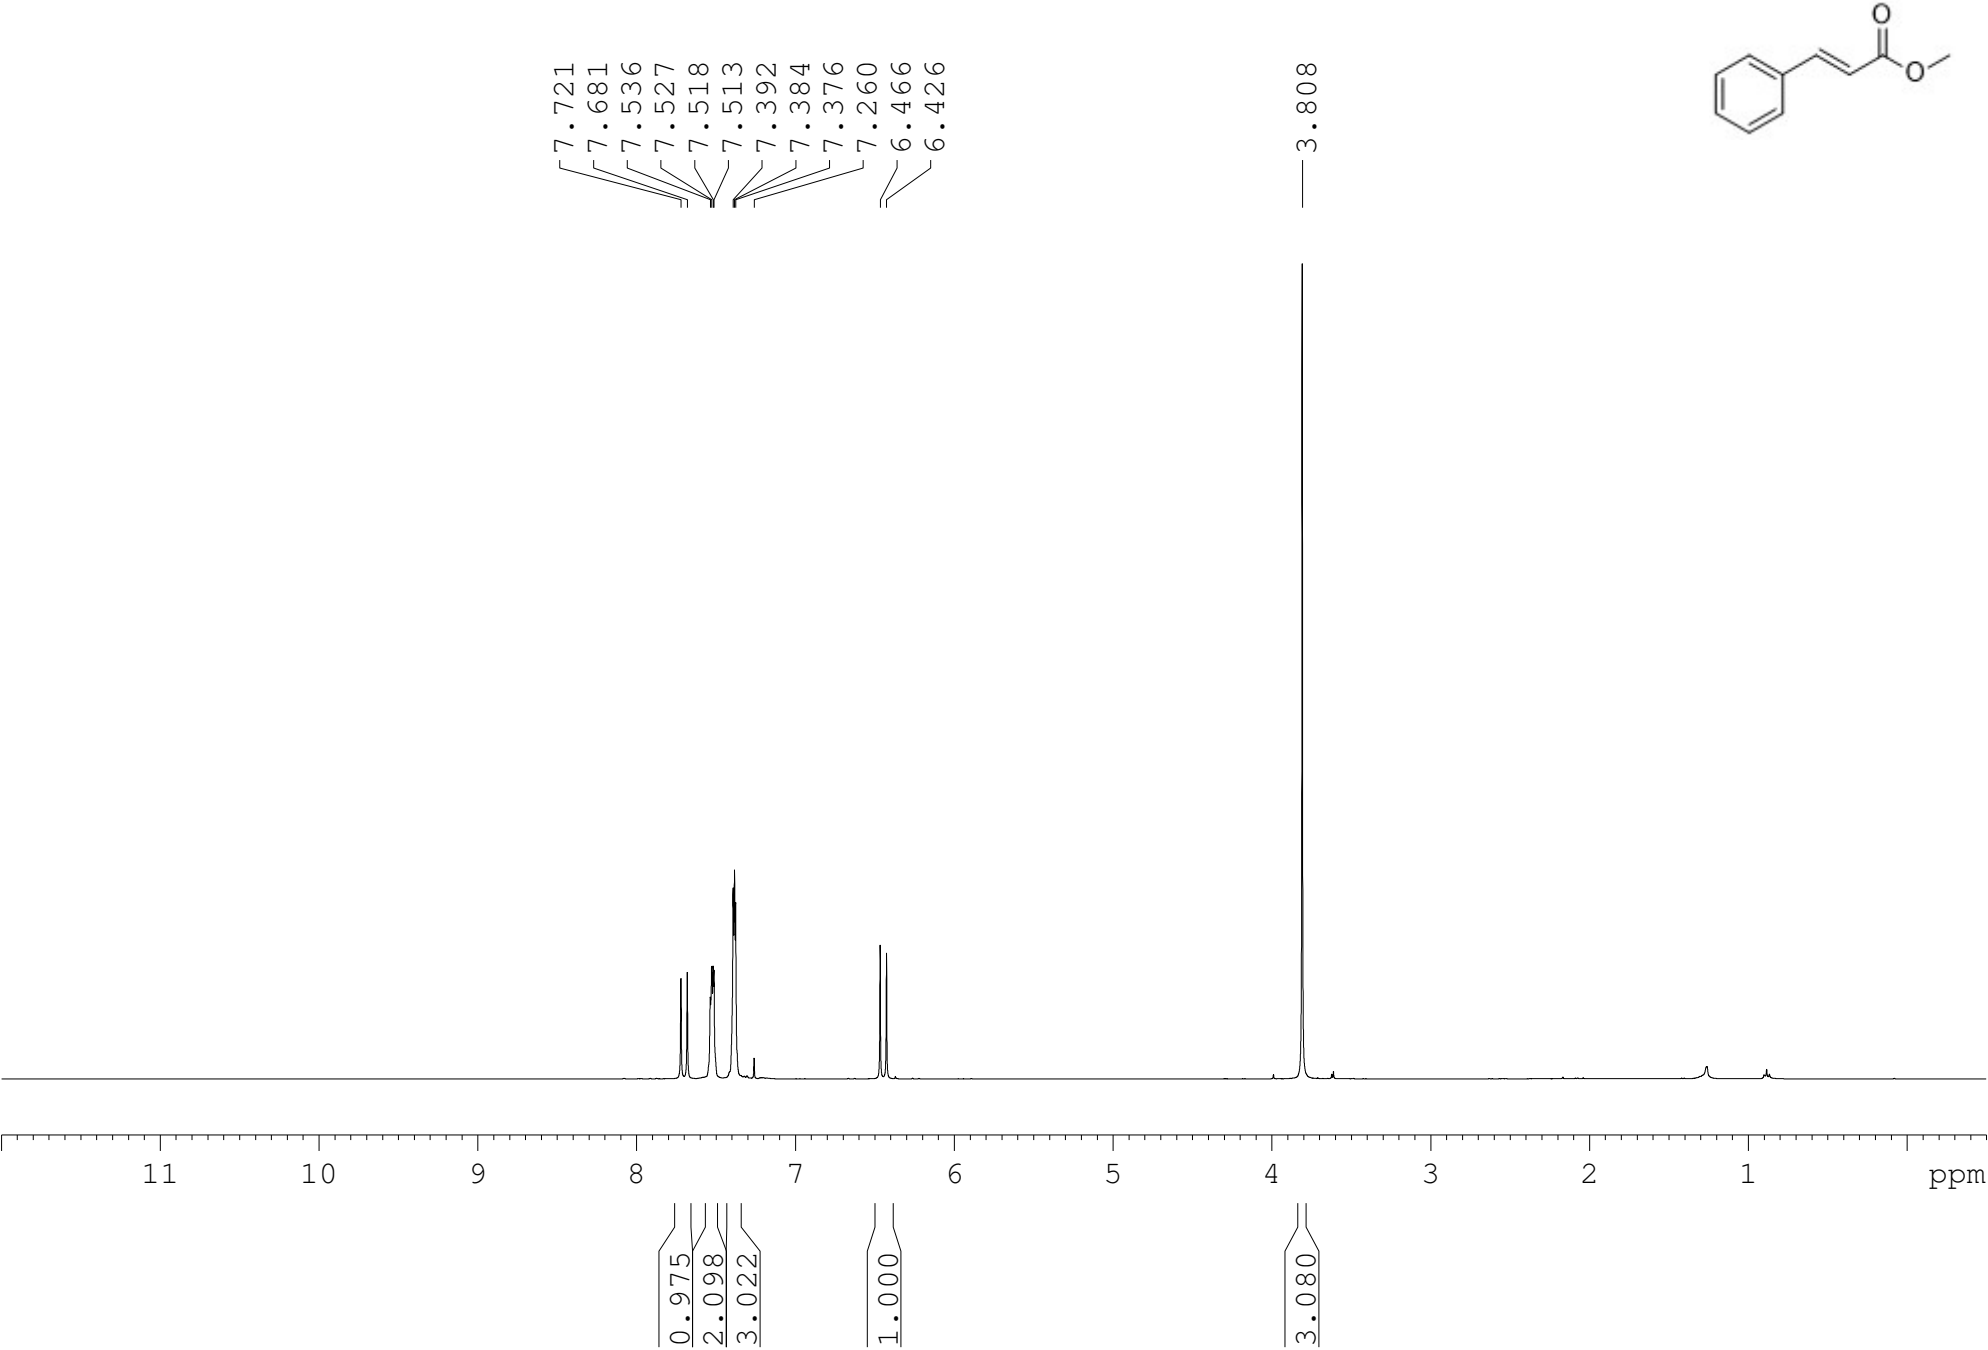

# Methyl cinnamate (8aa)

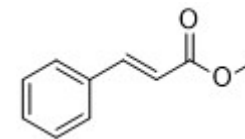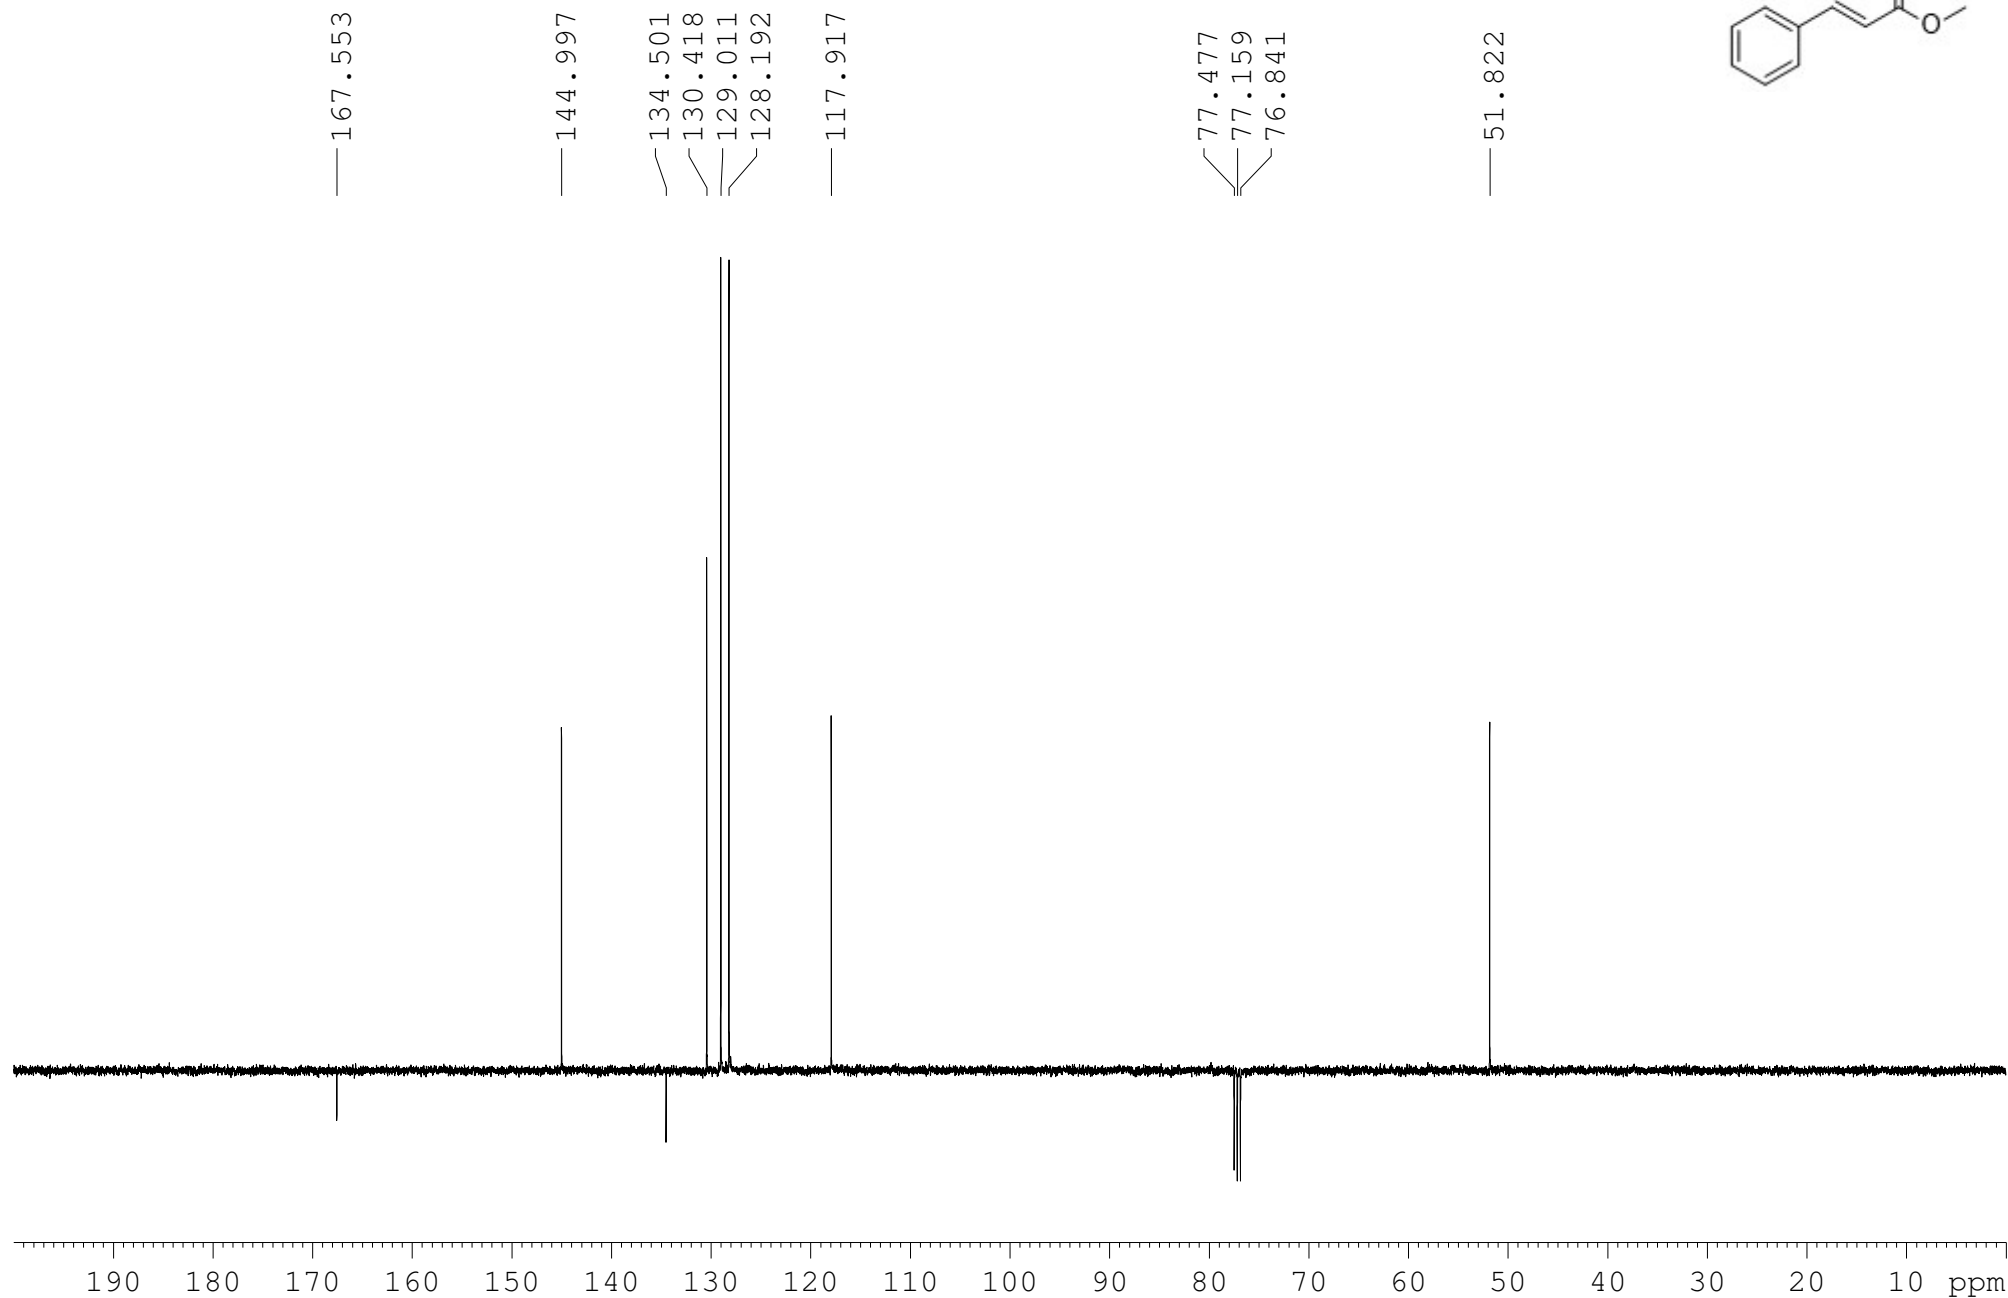

Butyl cinnamate (8ab)

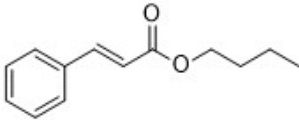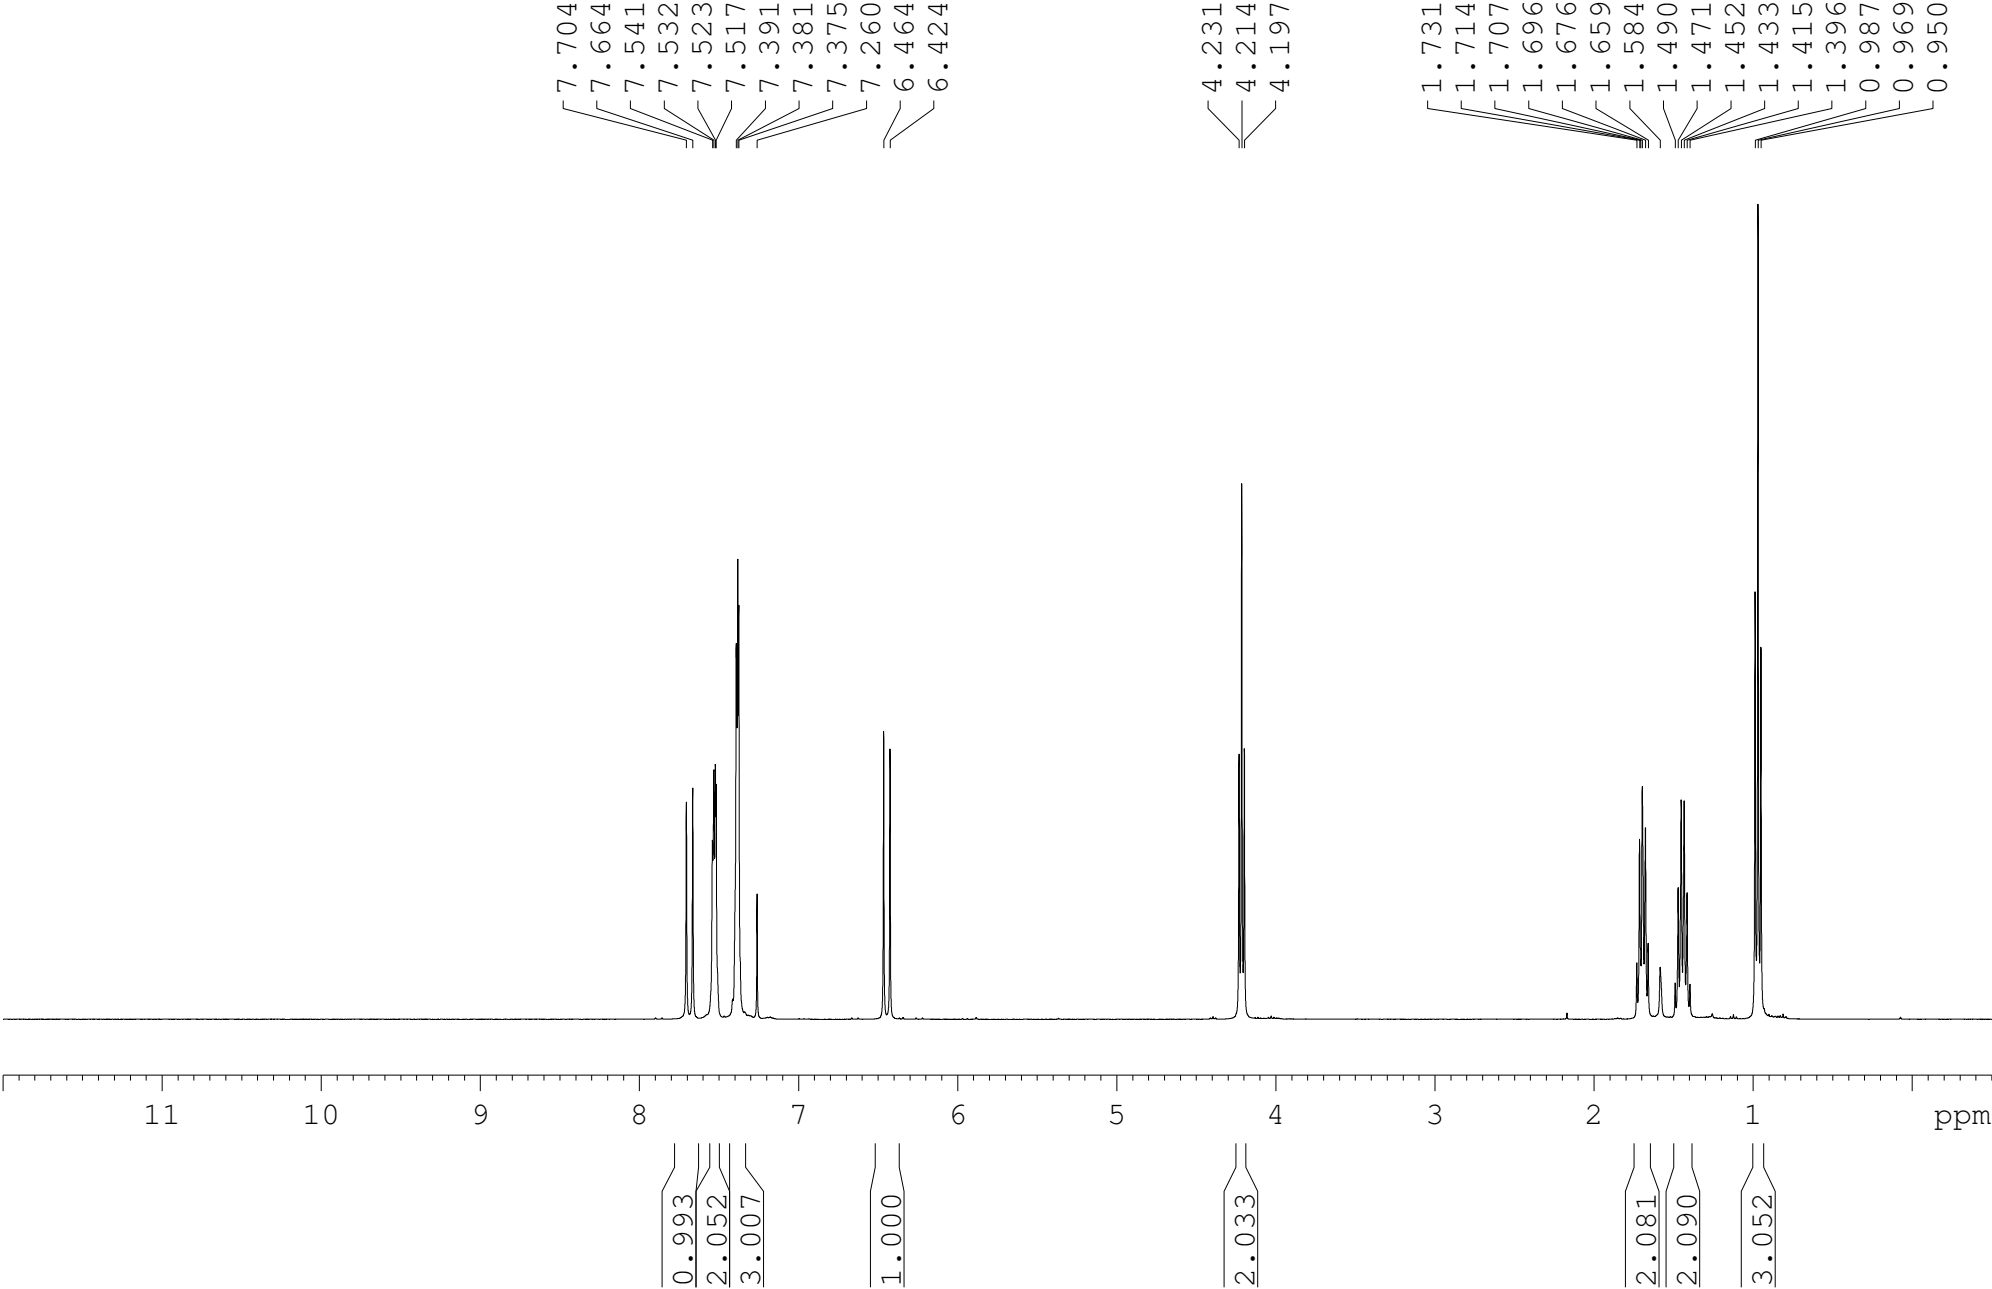



# Butyl cinnamate (**8ab**)

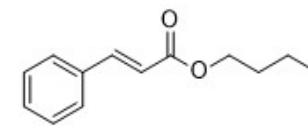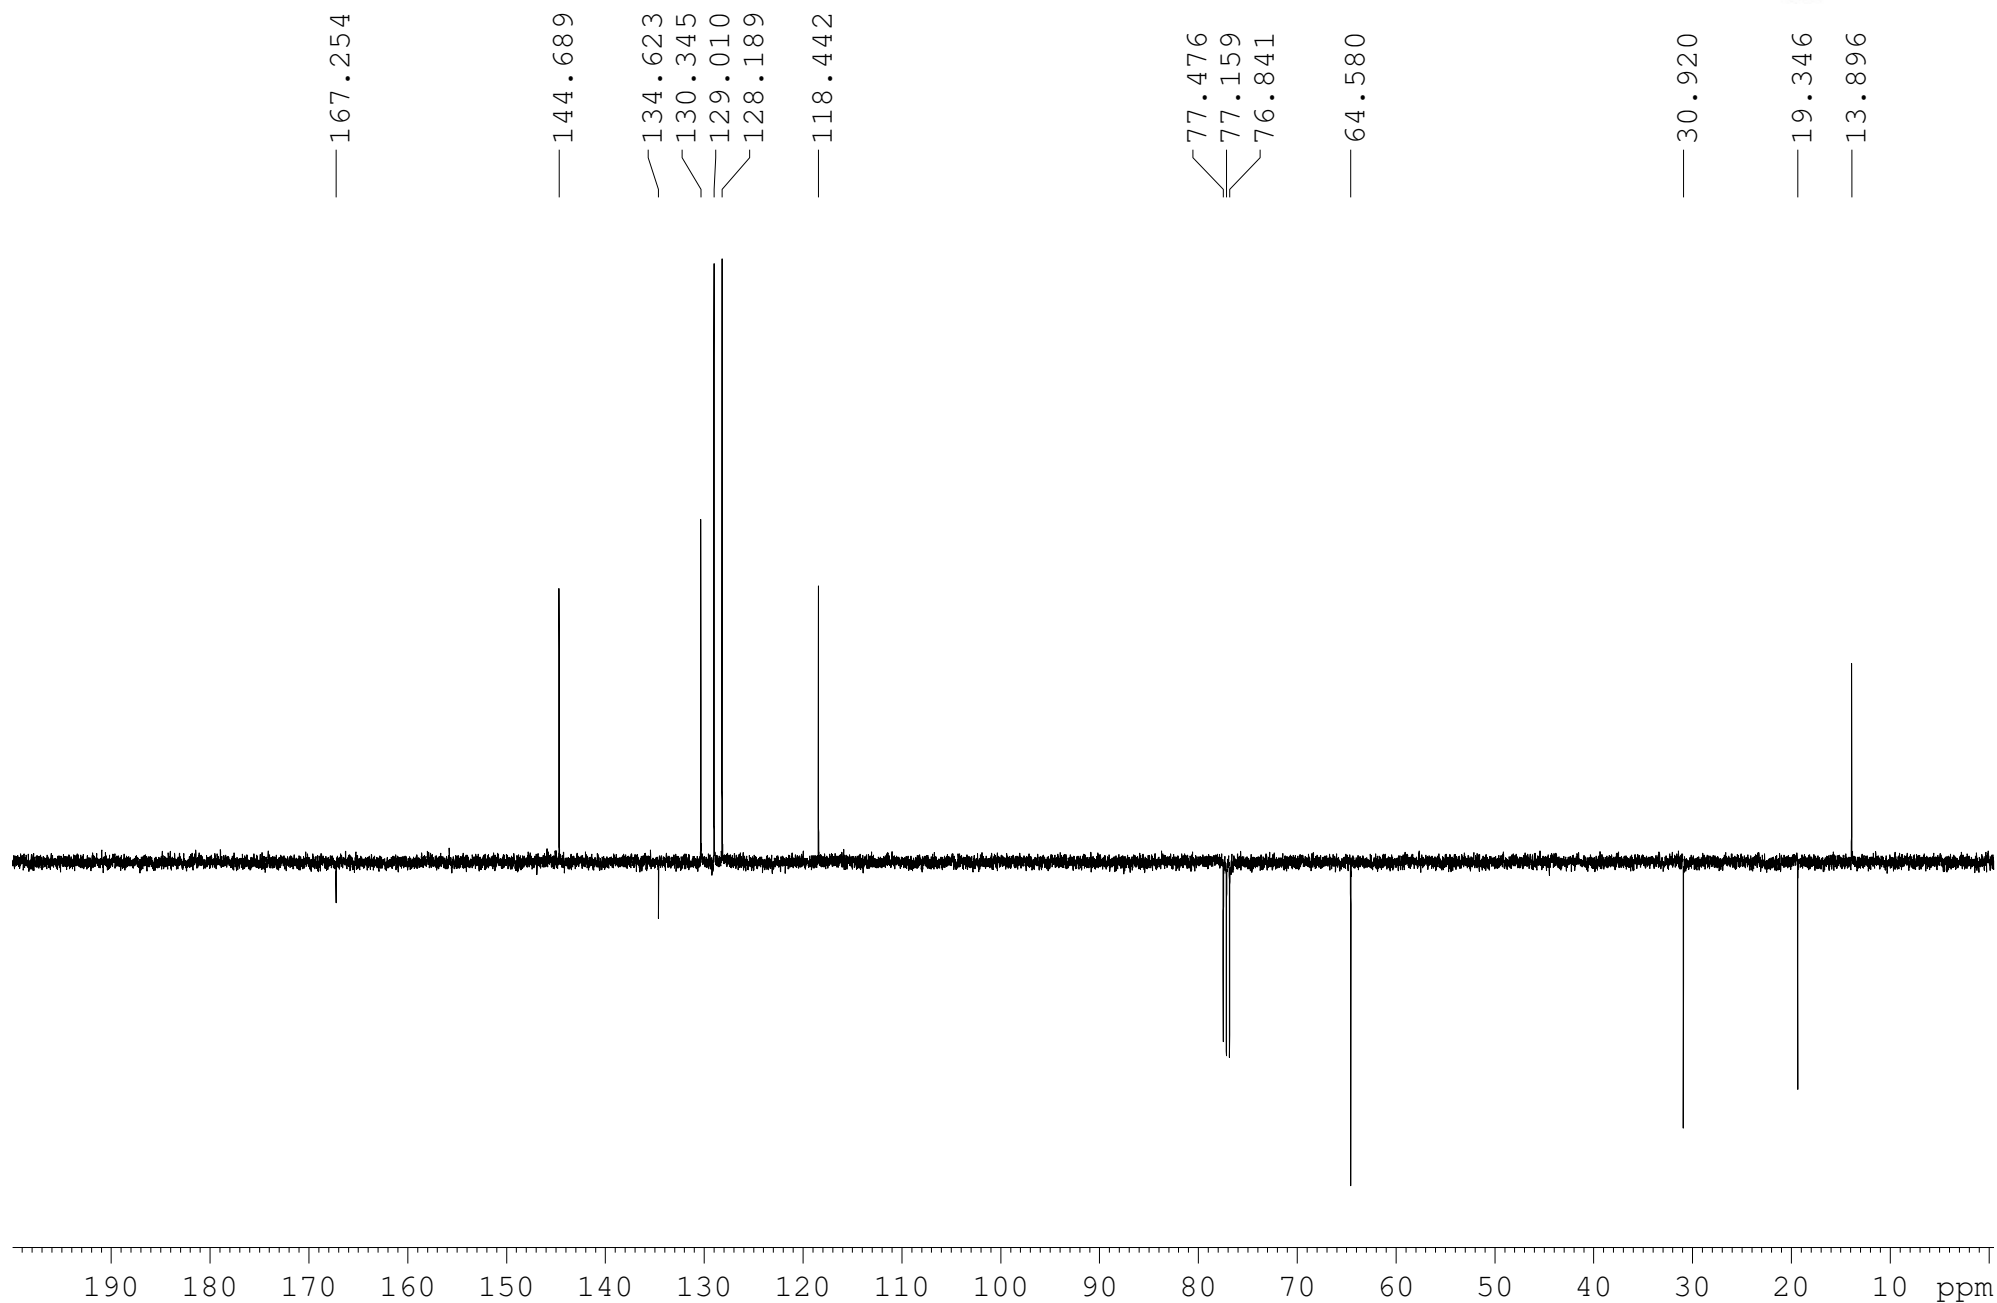

Methyl (E)-3-(p-tolyl)acrylate (**8ba**)

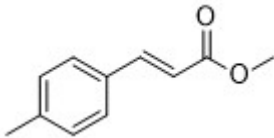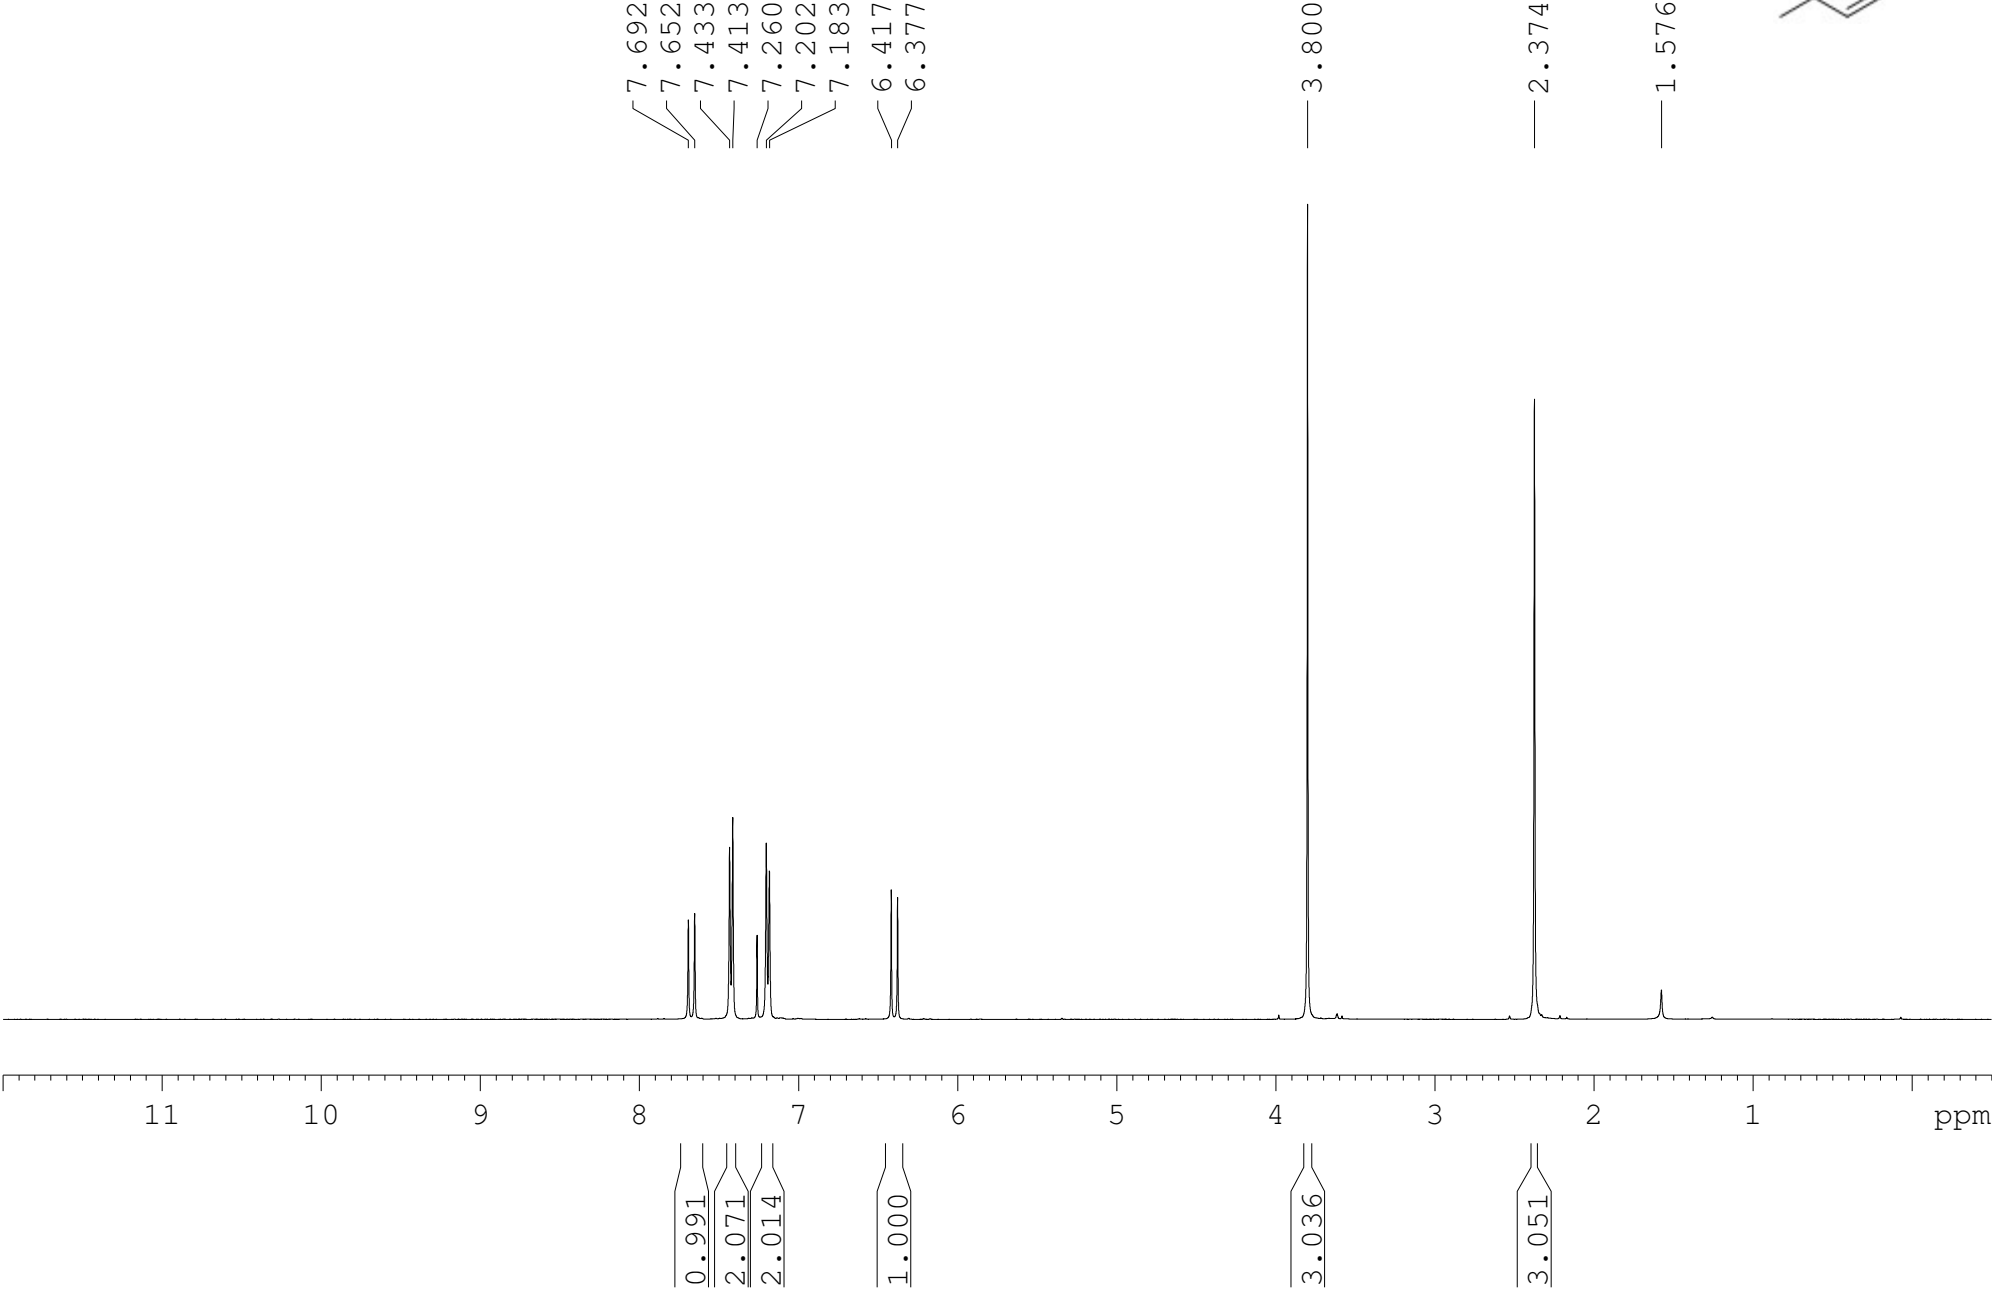

Methyl (E)-3-(p-tolyl)acrylate (**8ba**)

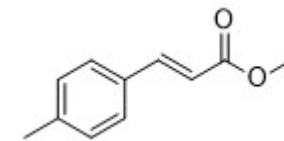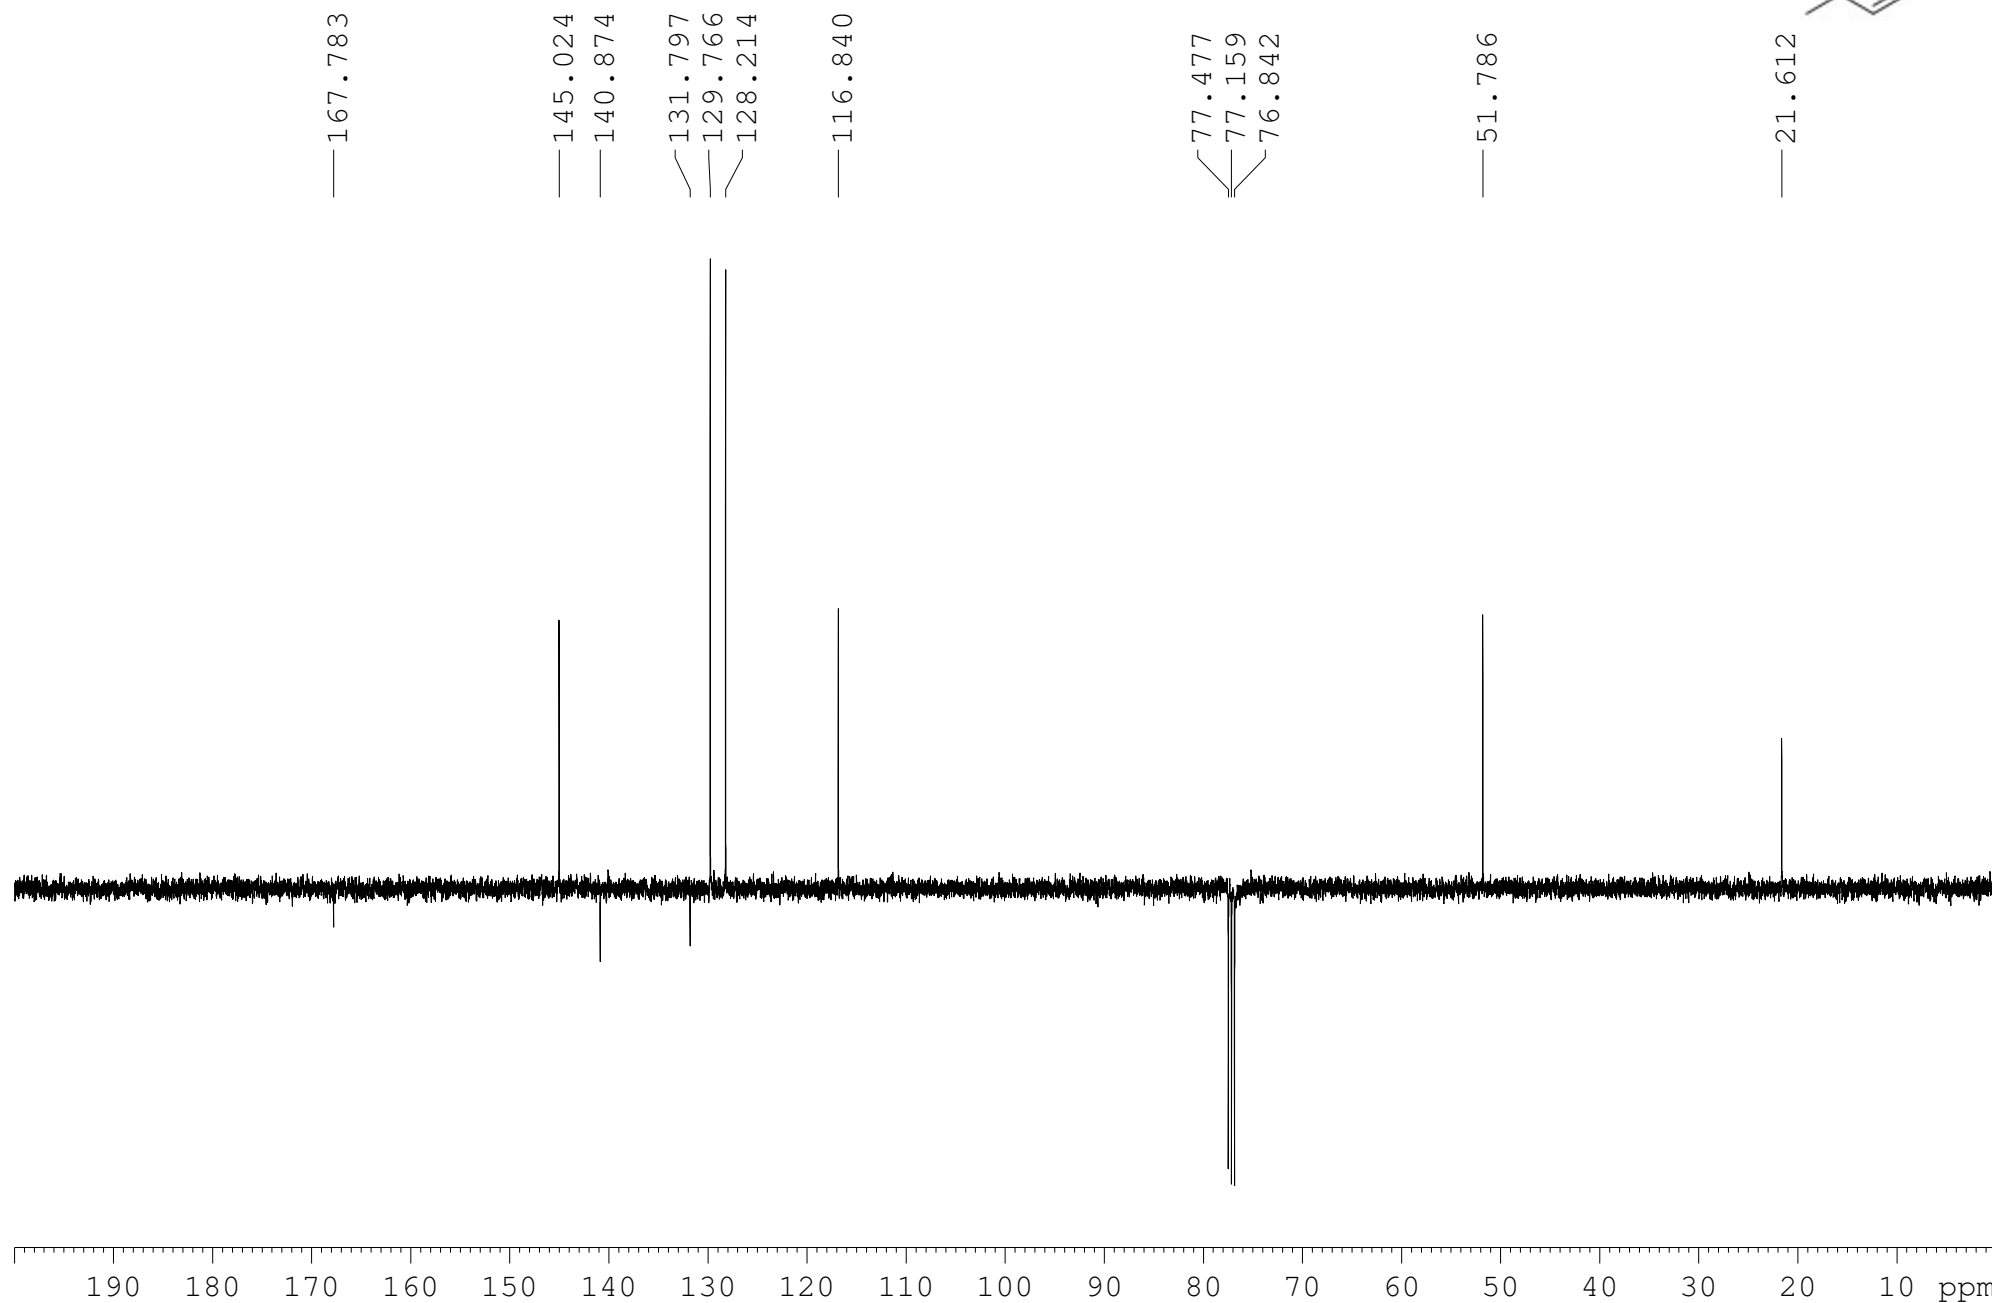

# Butyl (E)-3-(p-tolyl)acrylate (**8bb**)

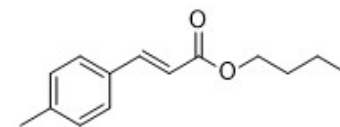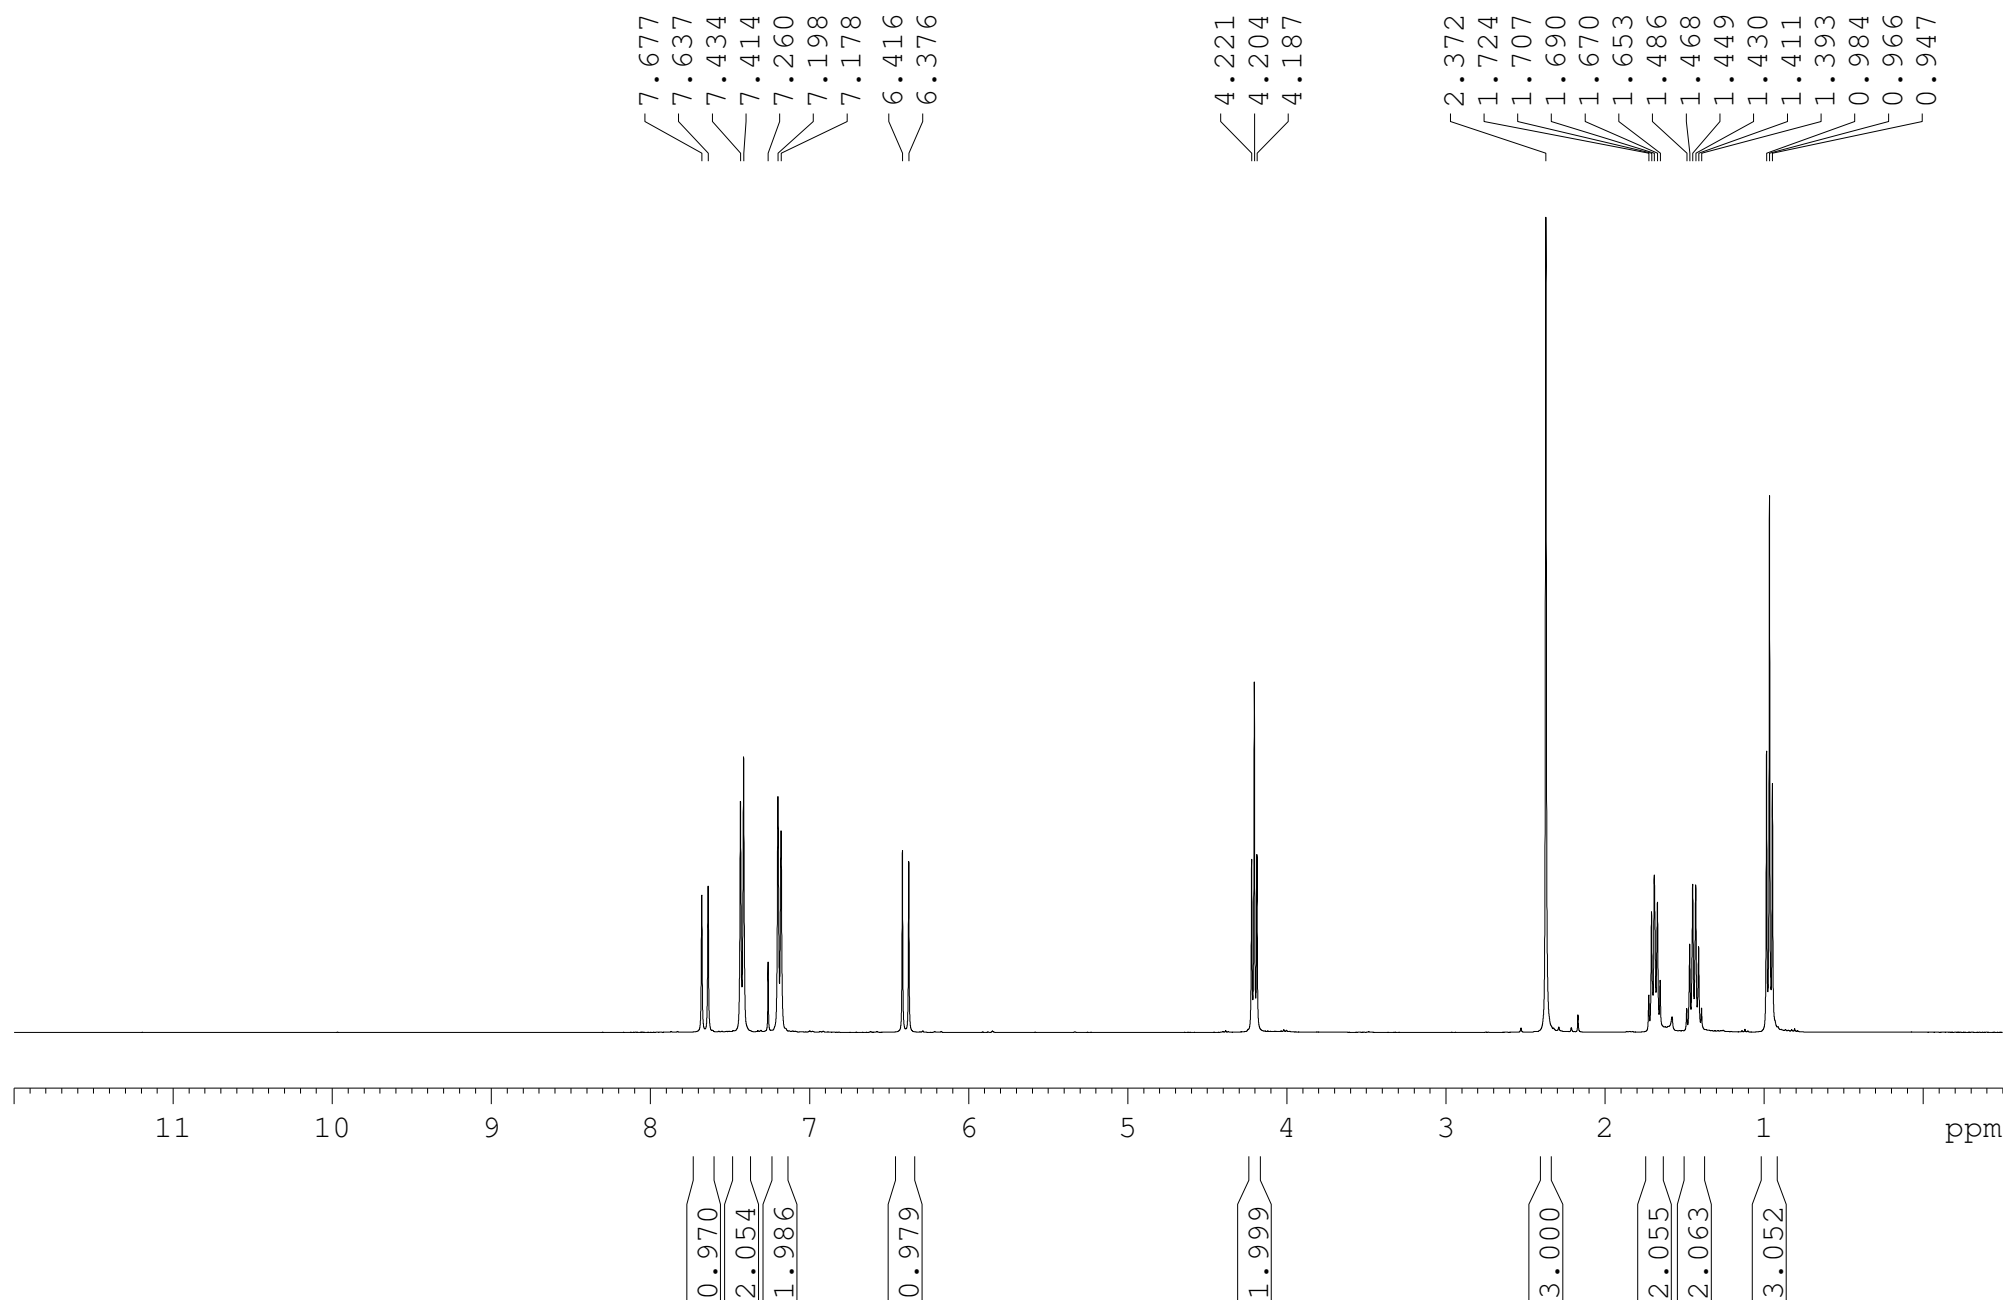

Butyl (E)-3-(p-tolyl)acrylate (**8bb**)

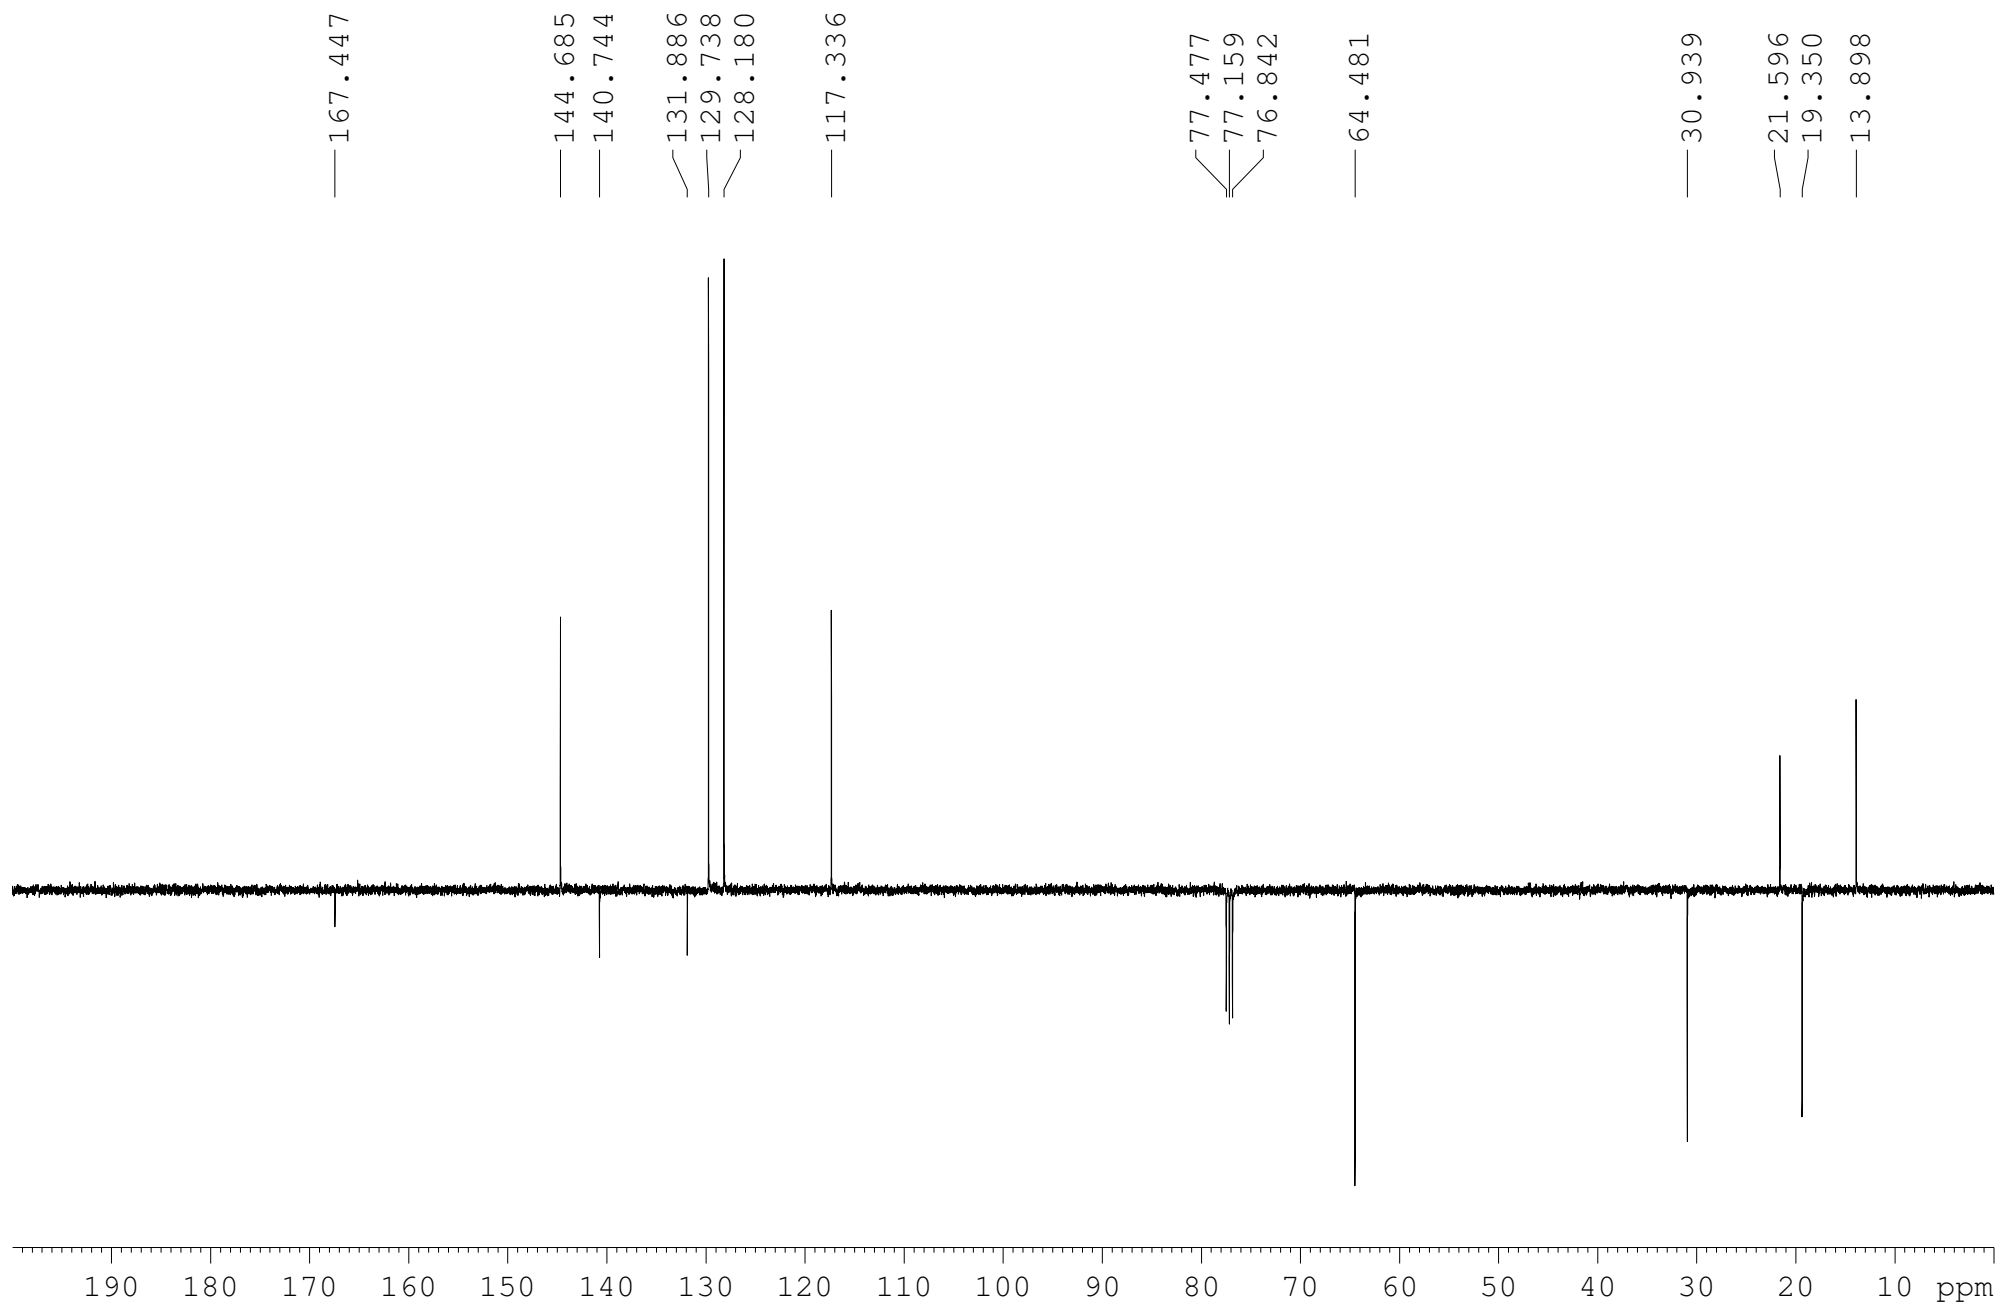

Methyl (E)-3-(4-methoxyphenyl)acrylate (**8ca**)

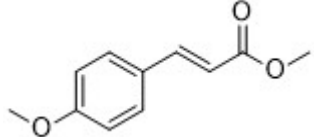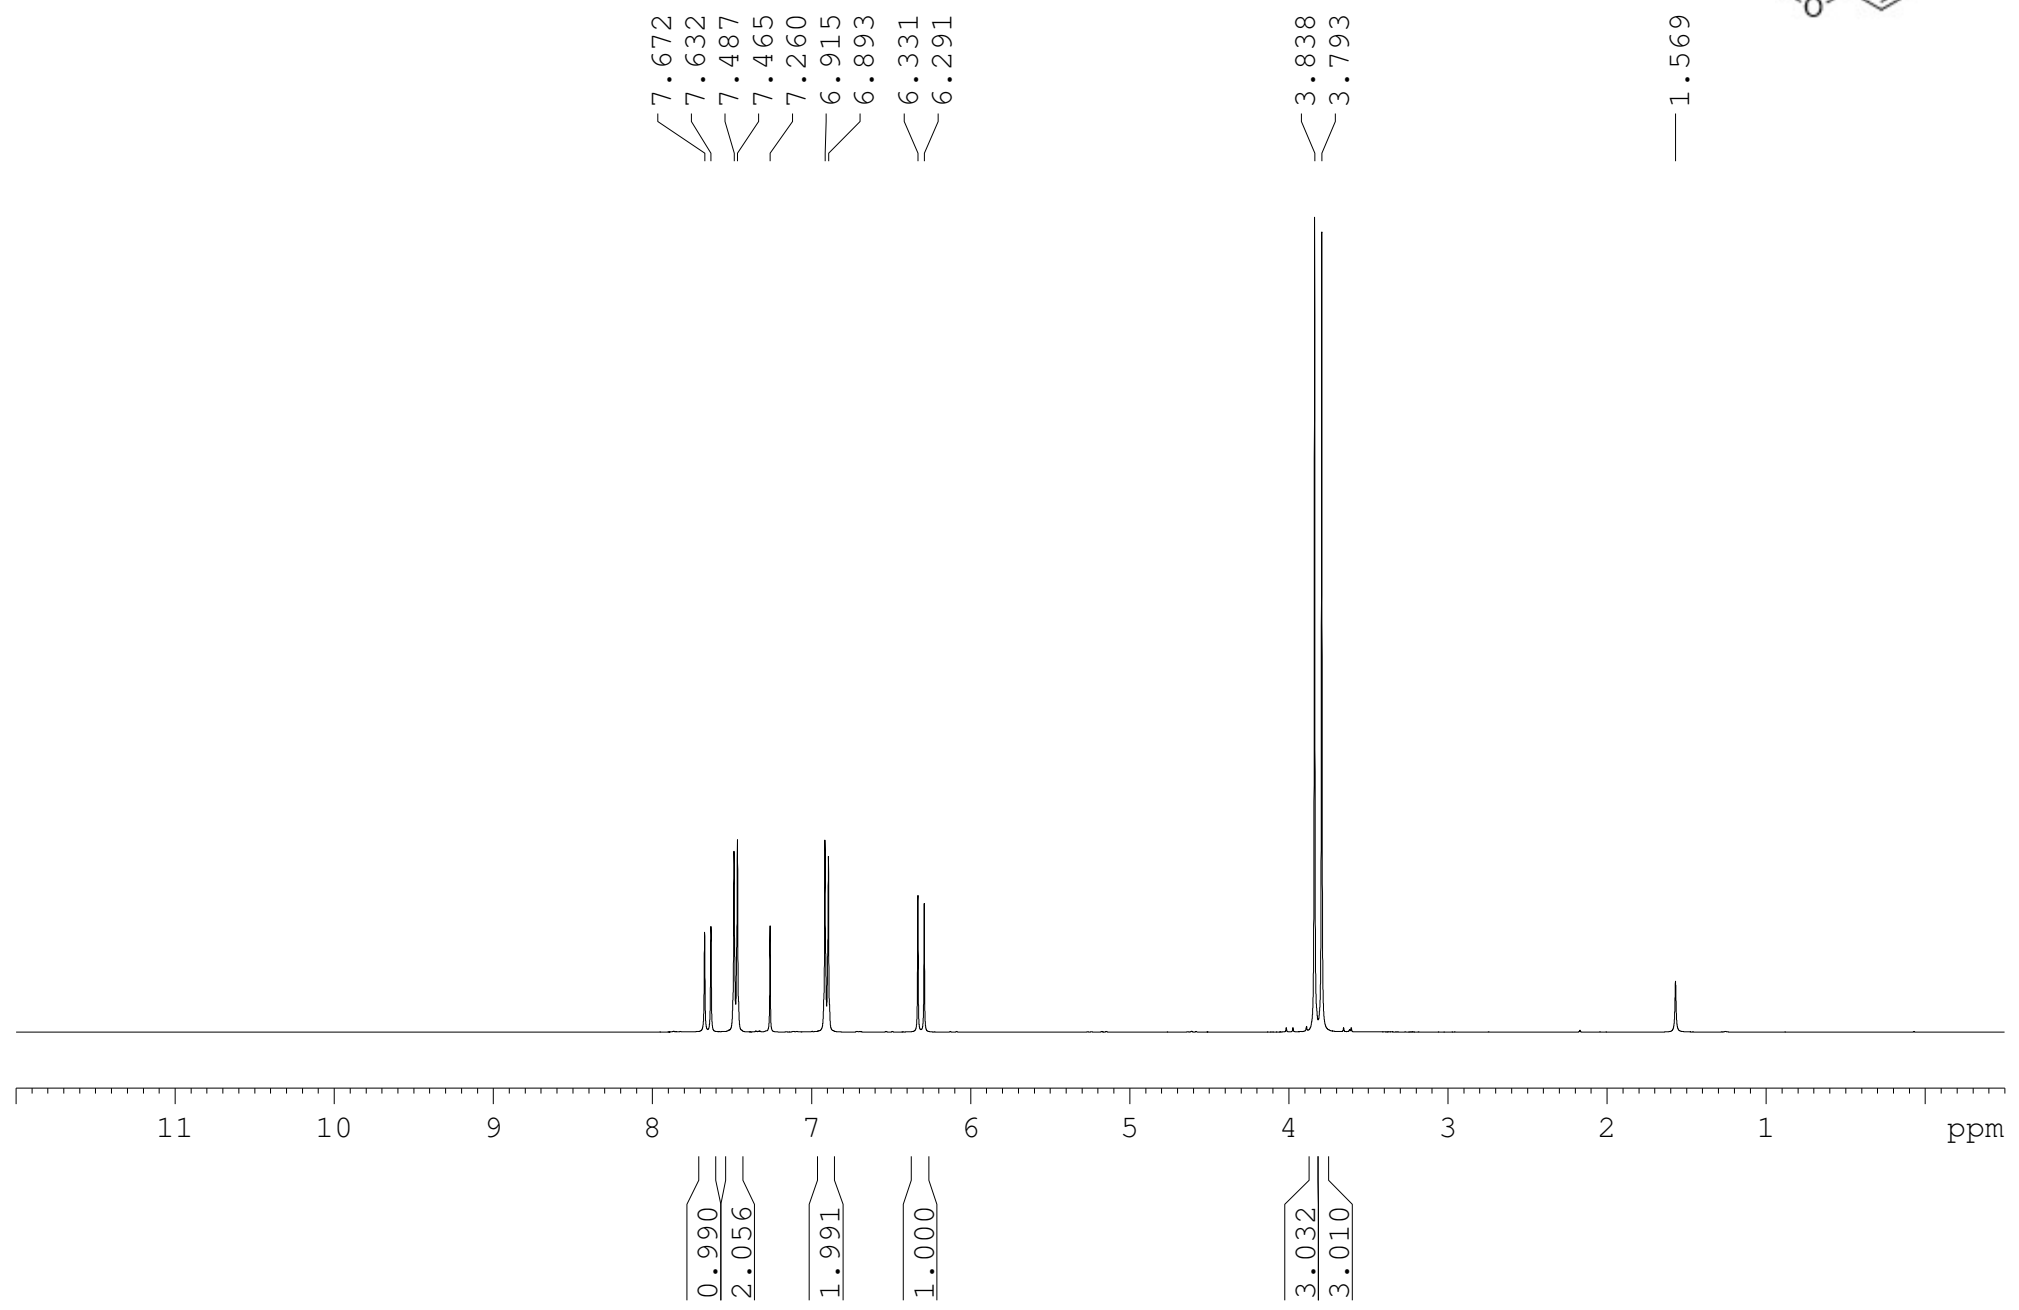

Methyl (E)-3-(4-methoxyphenyl)acrylate (**8ca**)

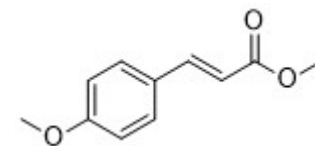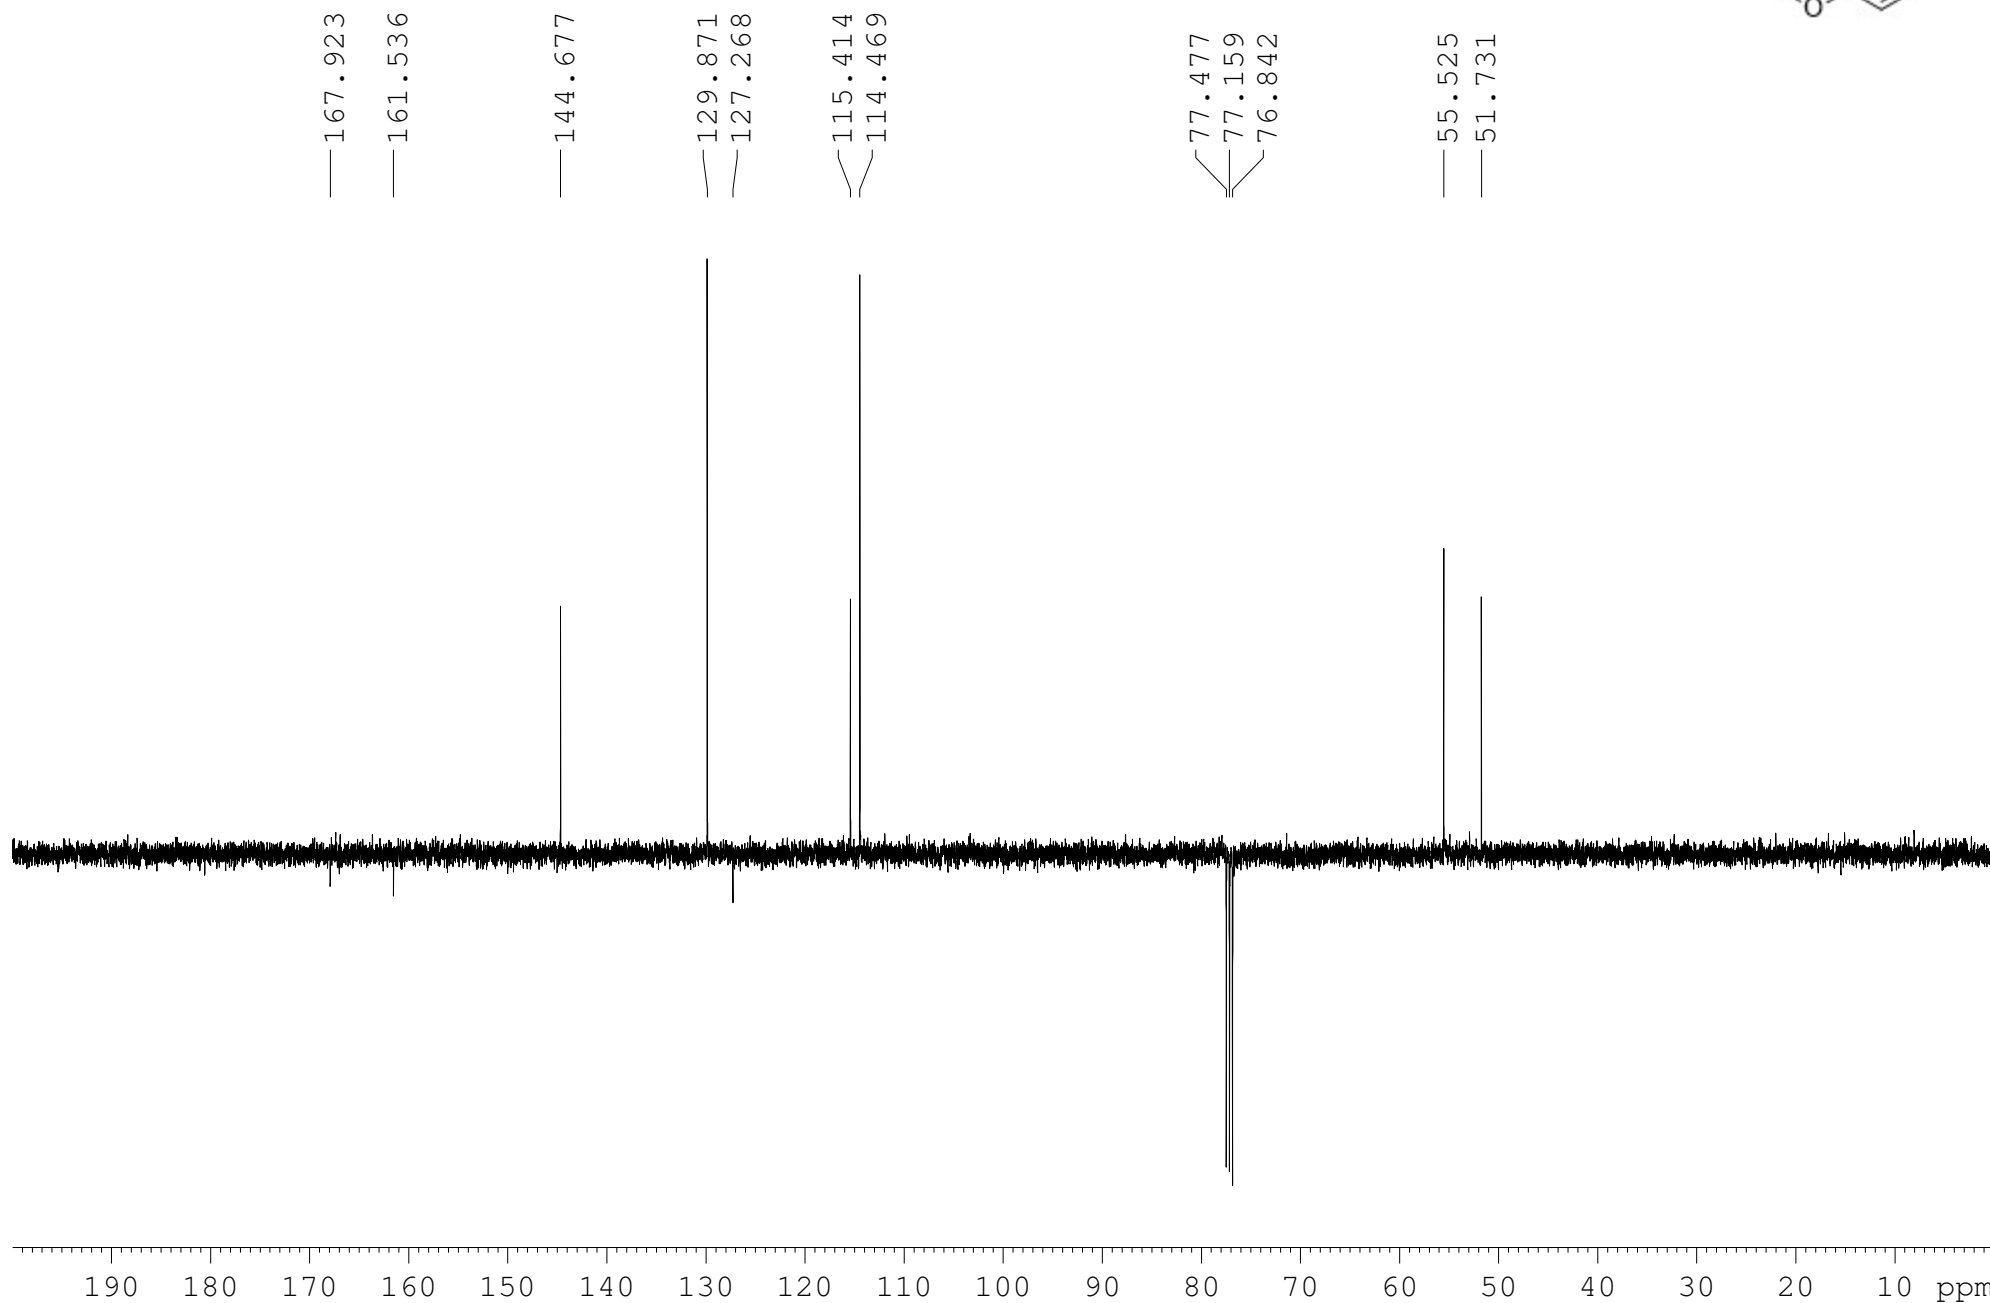

Butyl (E)-3-(4-methoxyphenyl)acrylate (**8cb**)

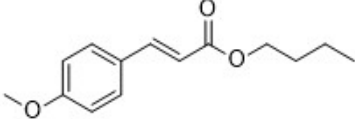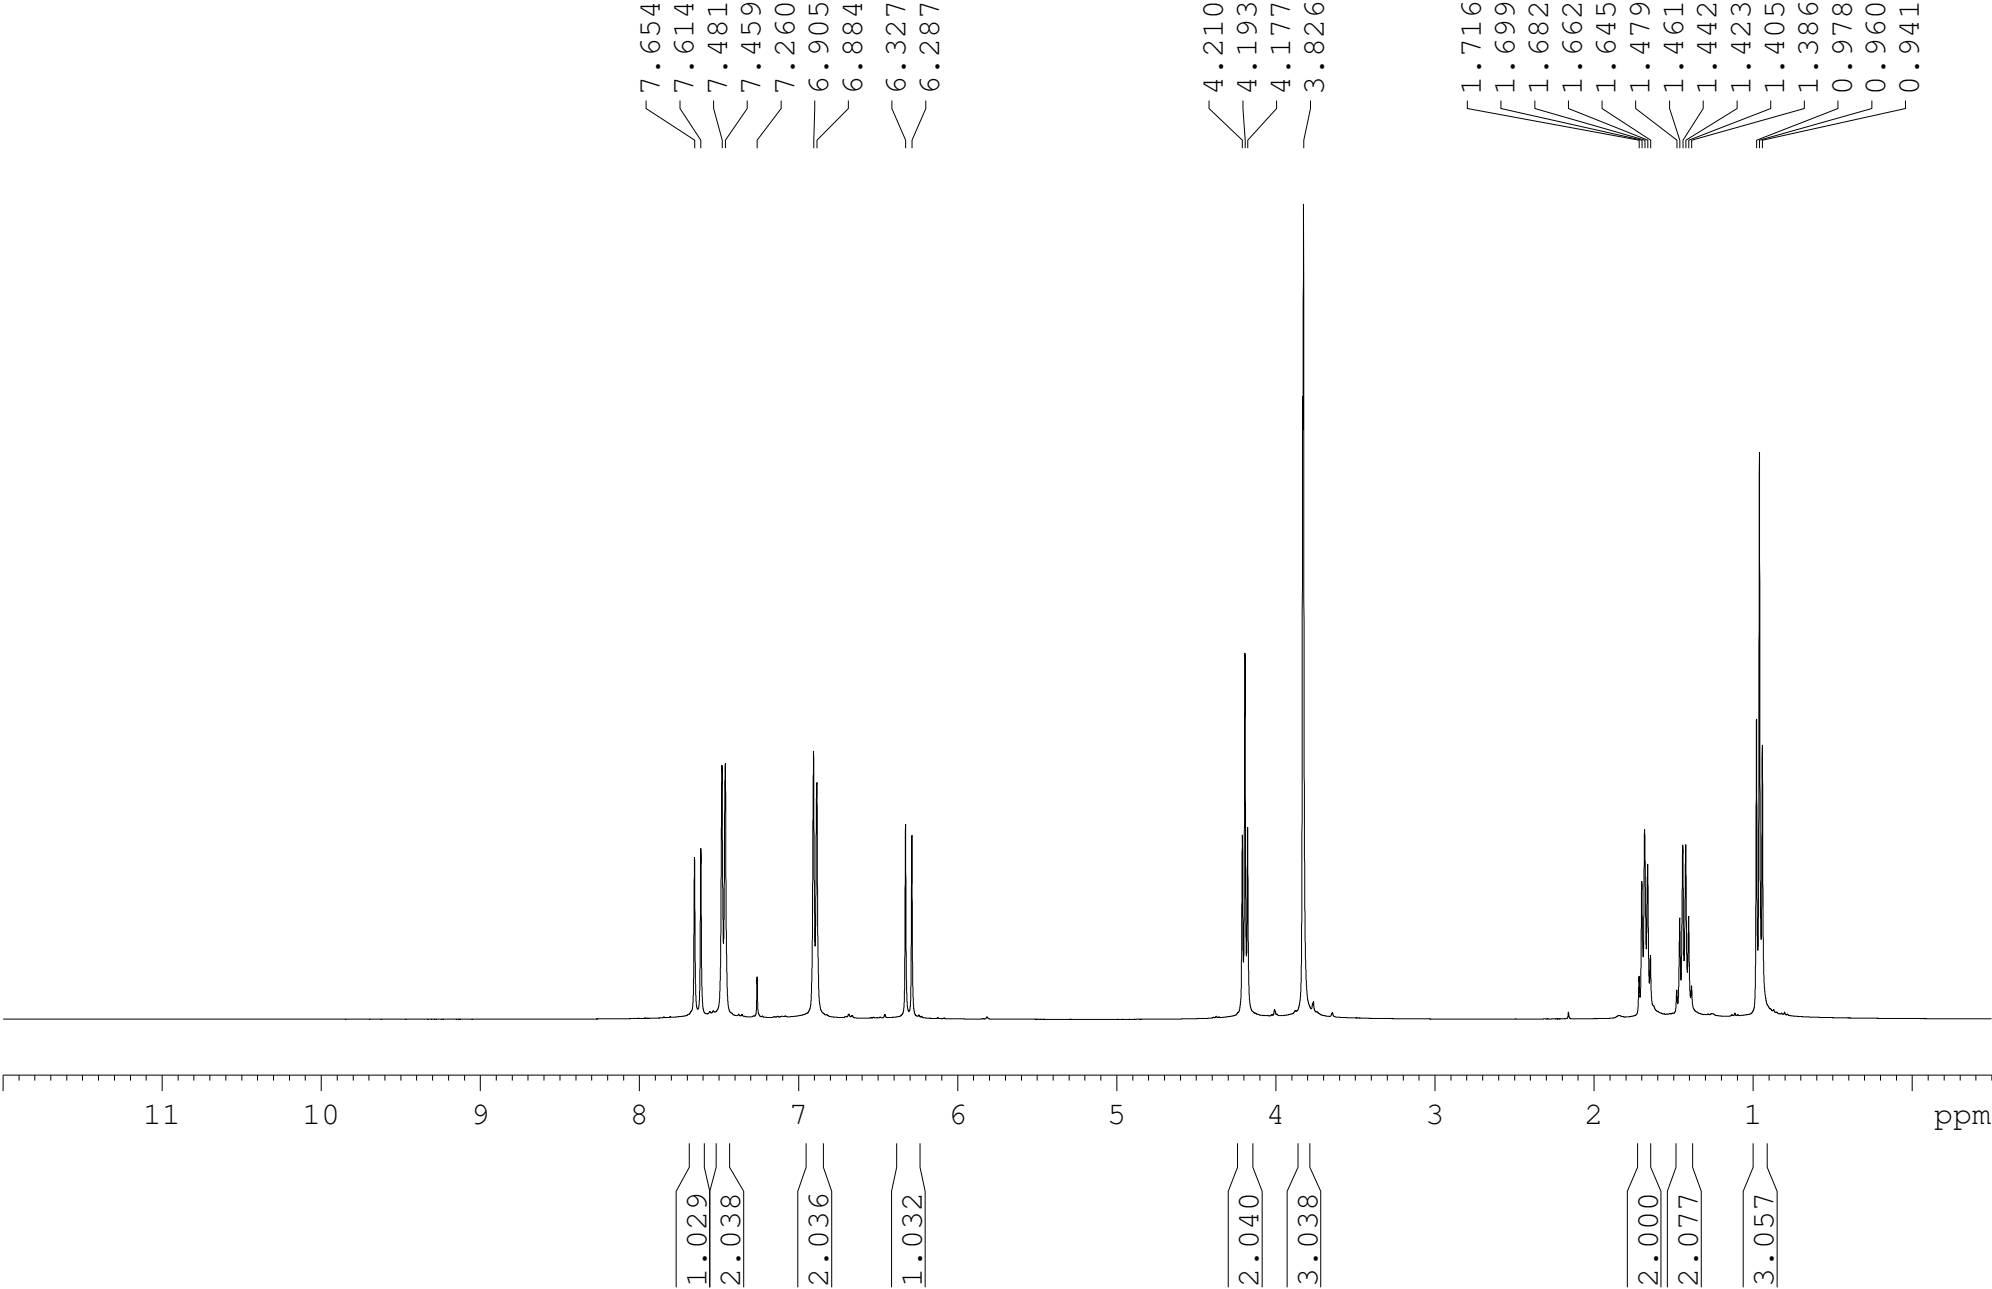



Butyl (E)-3-(4-methoxyphenyl)acrylate (**8cb**)

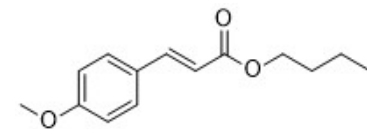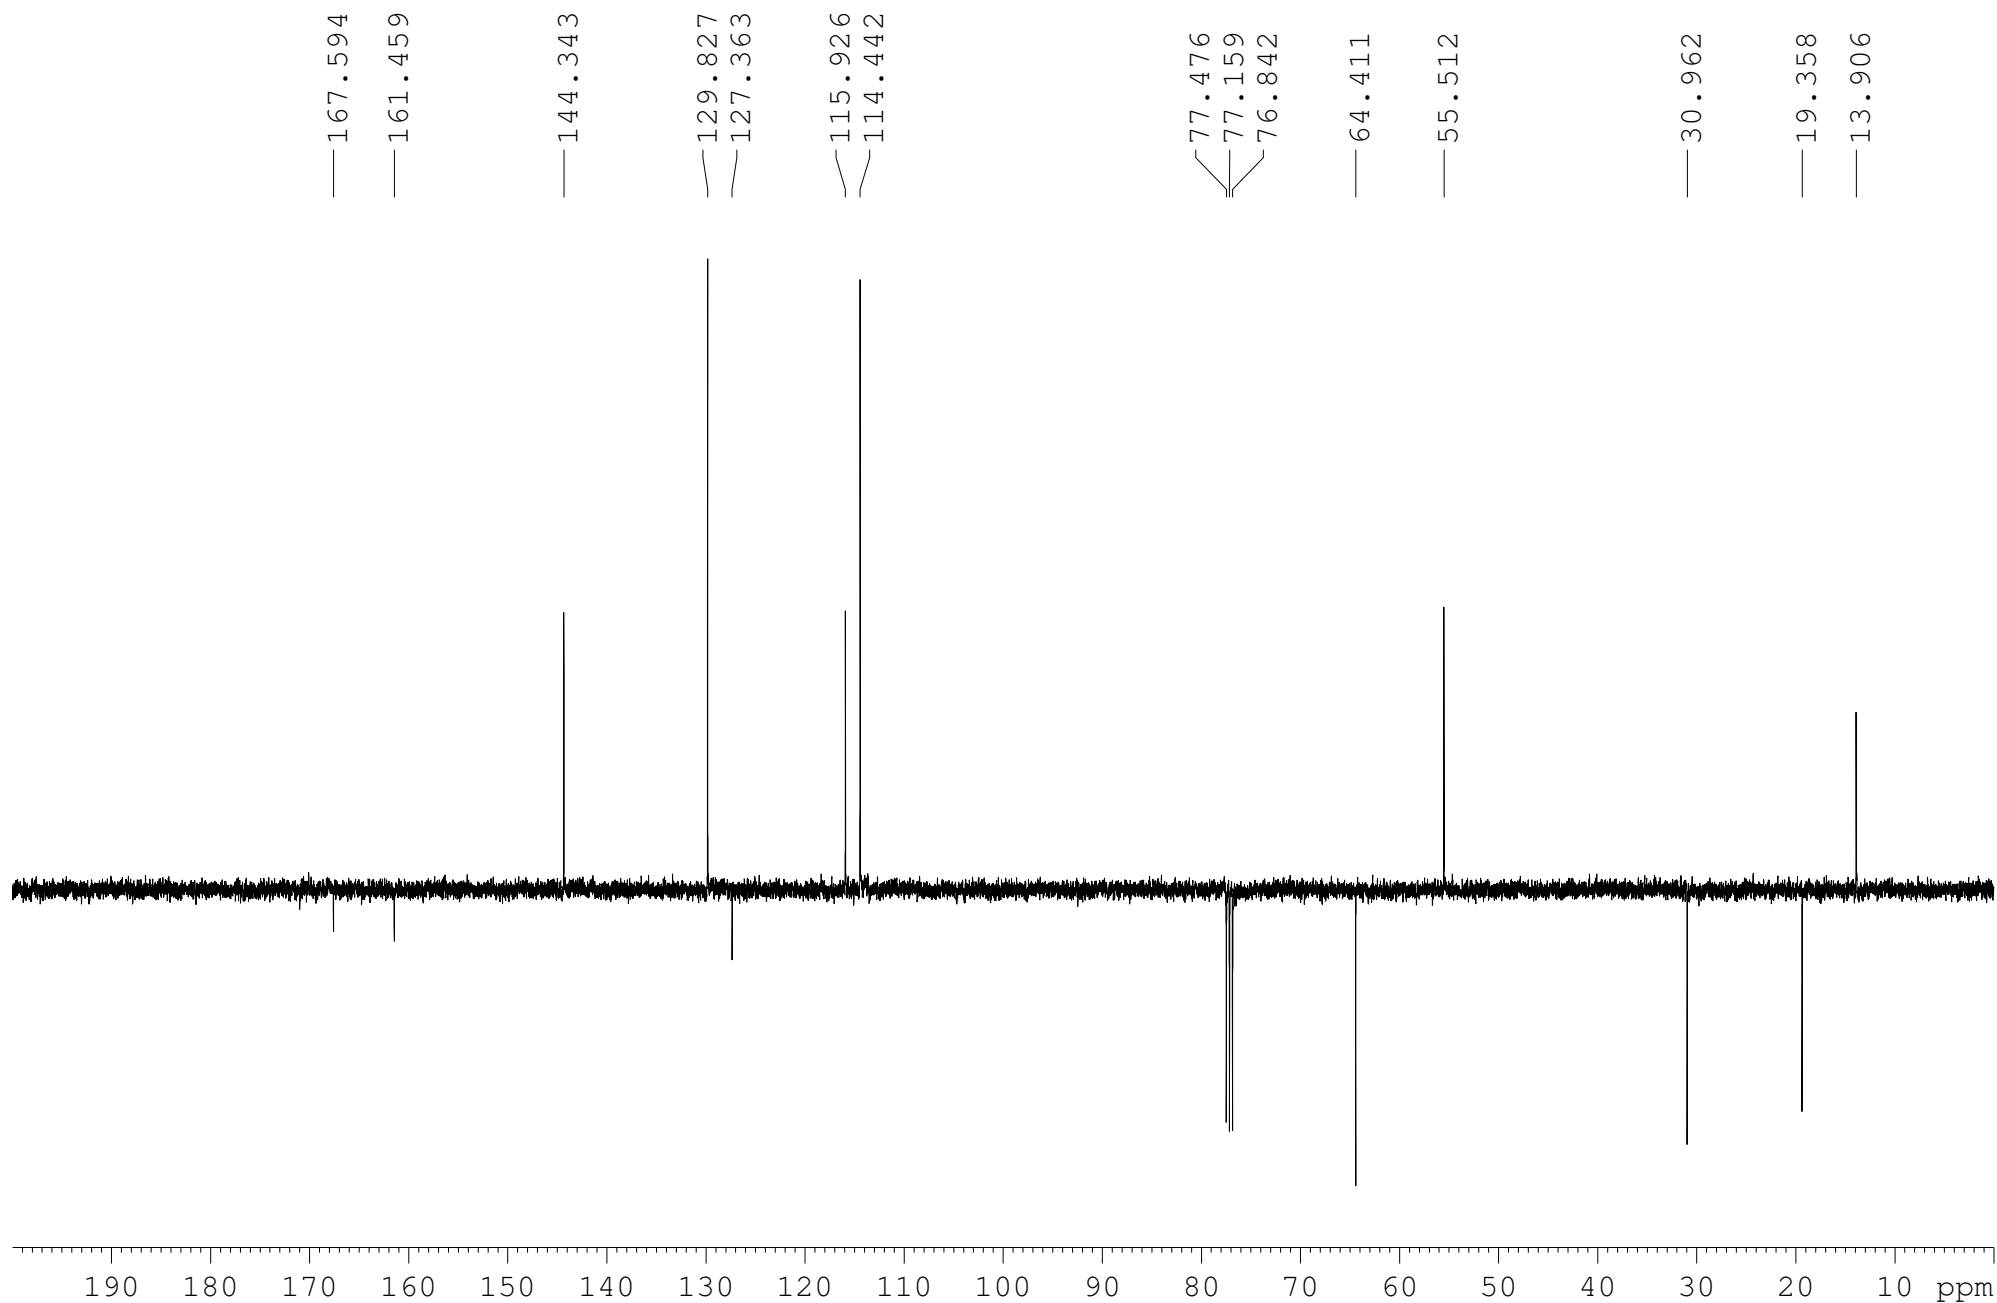

Methyl (E)-3-(4-acetylphenyl)acrylate (**8da**)

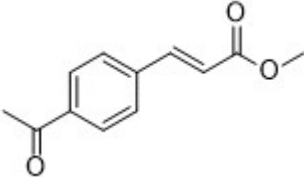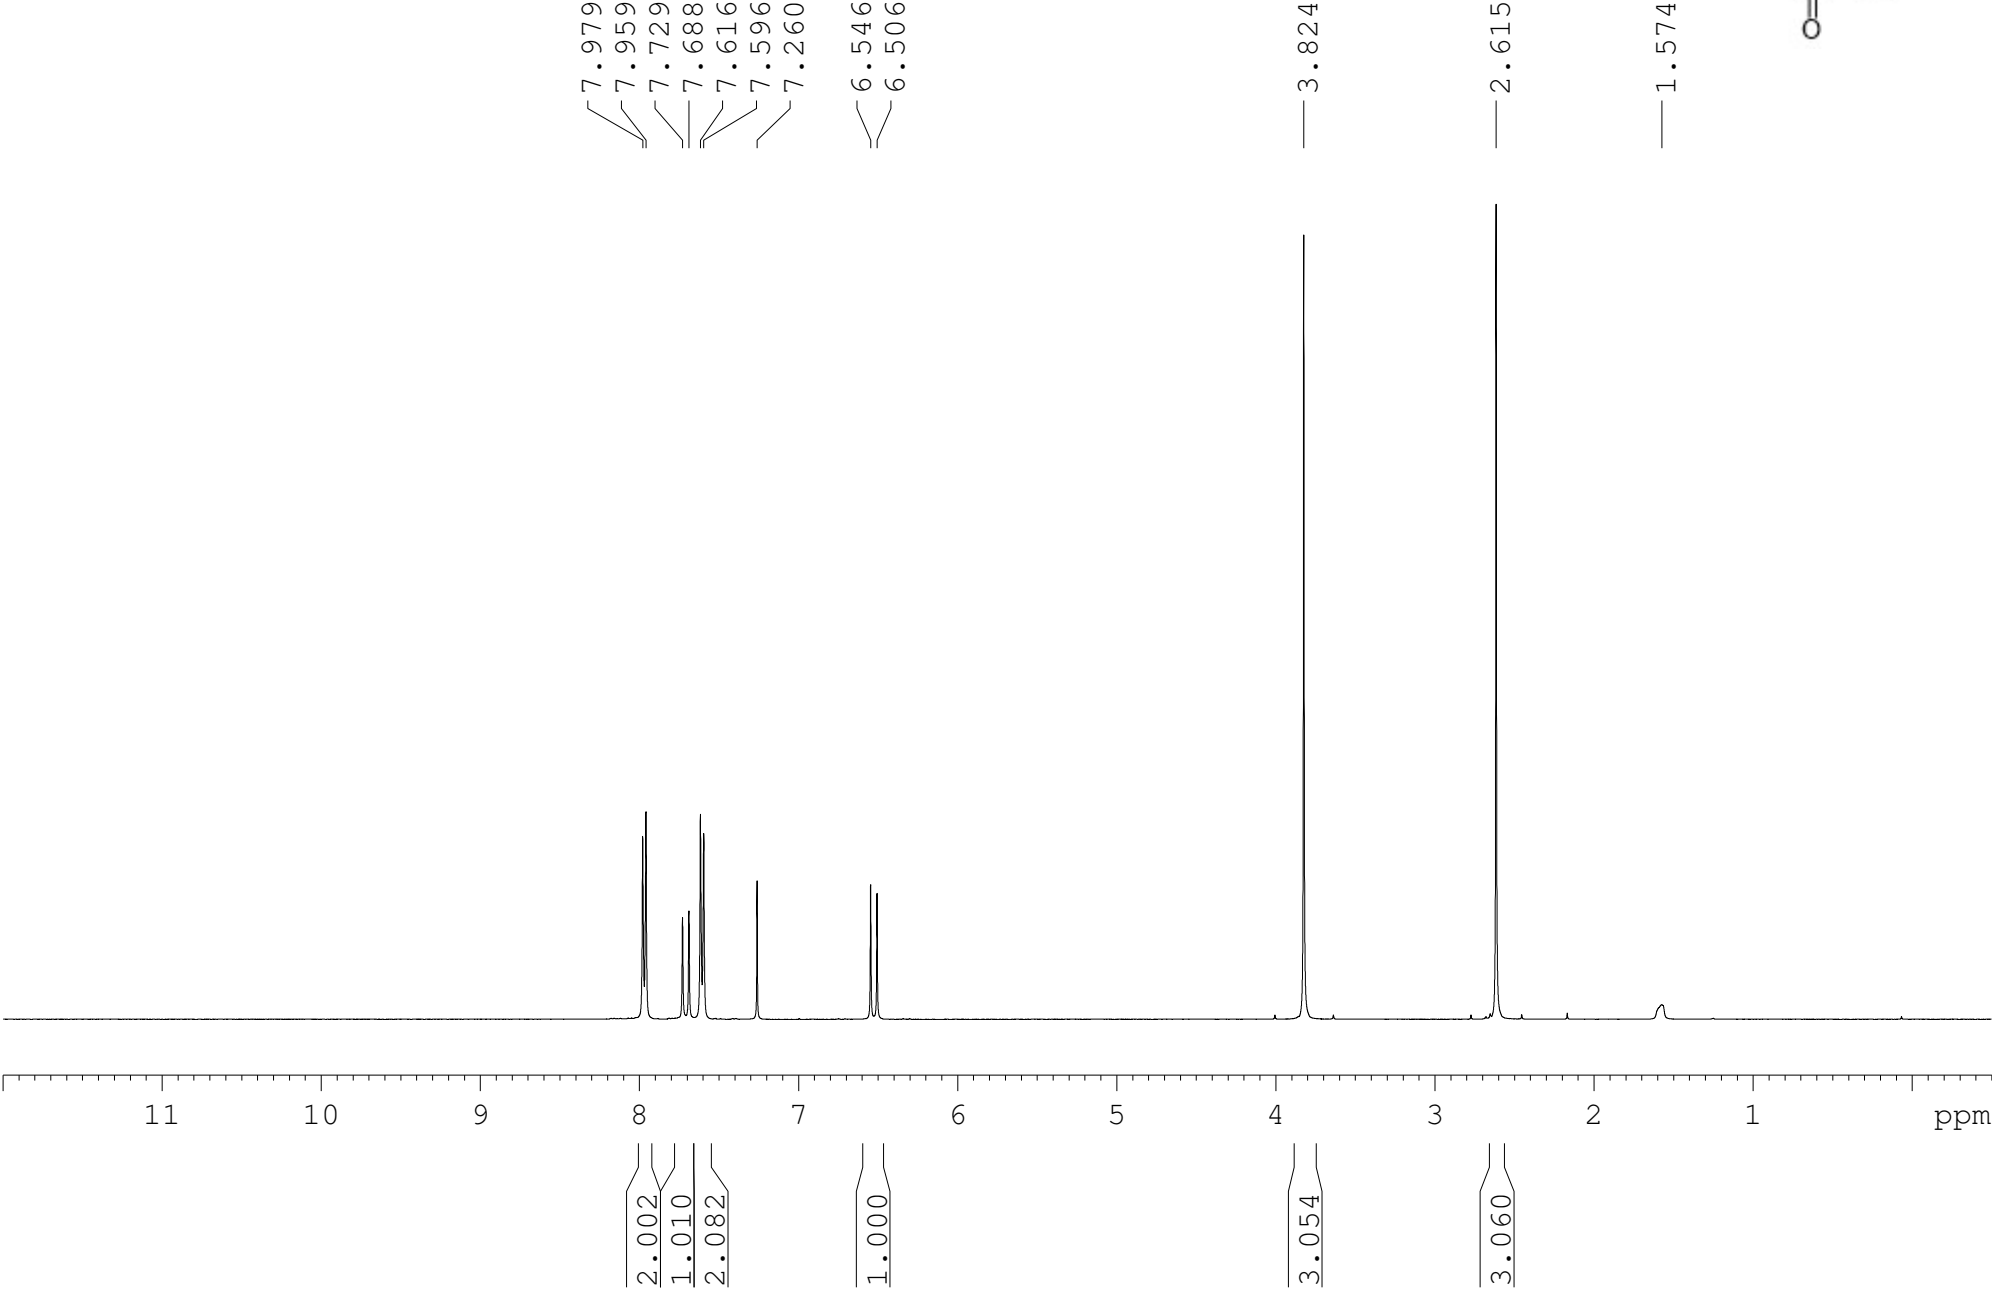

Methyl (E)-3-(4-acetylphenyl)acrylate (**8da**)

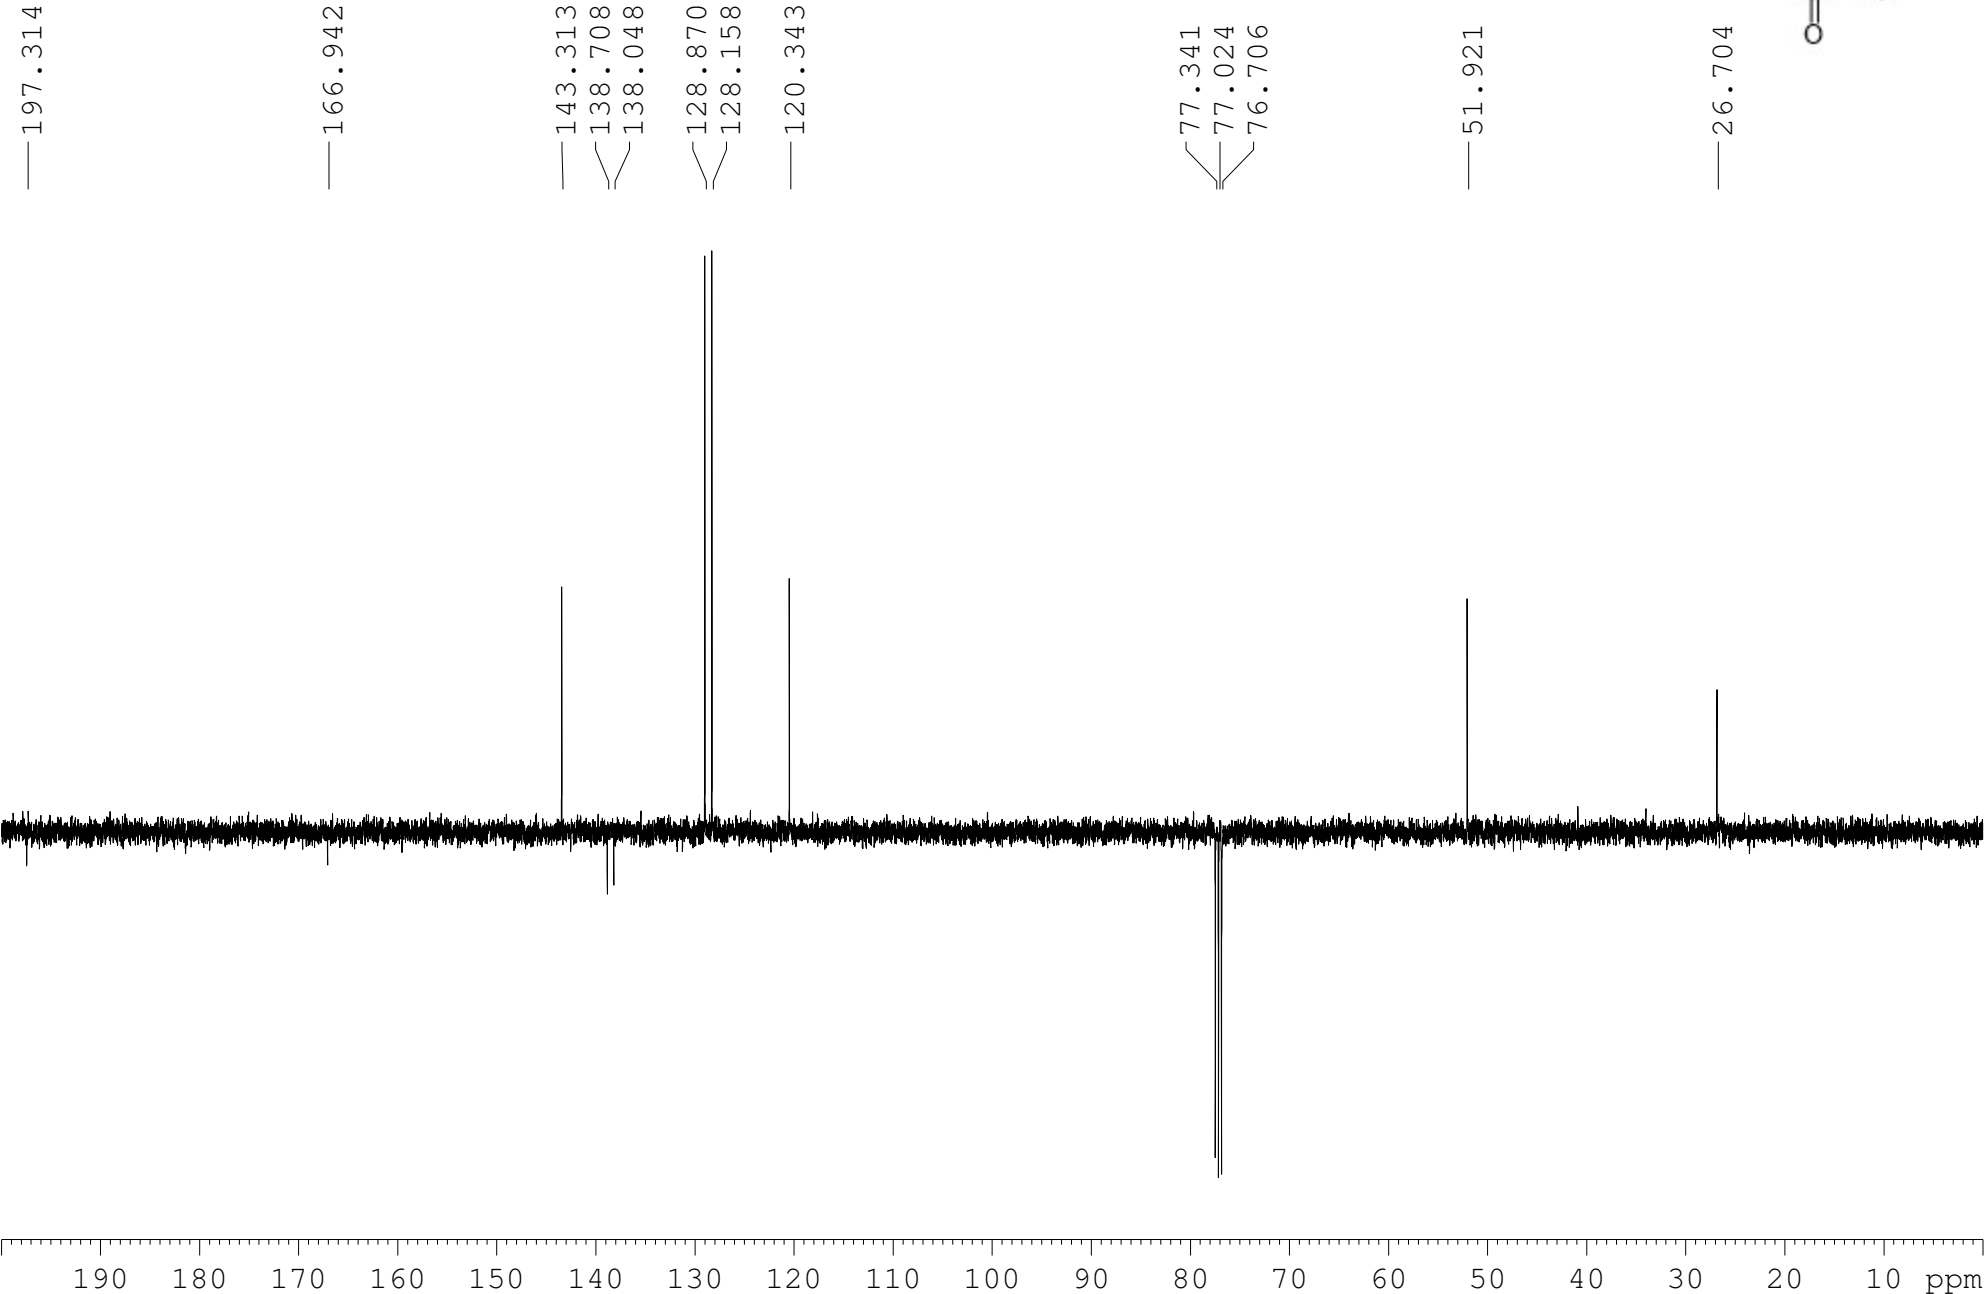

Butyl (E)-3-(4-acetylphenyl)acrylate (**8db**)

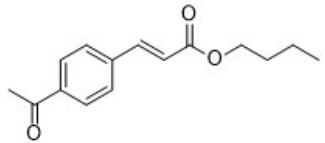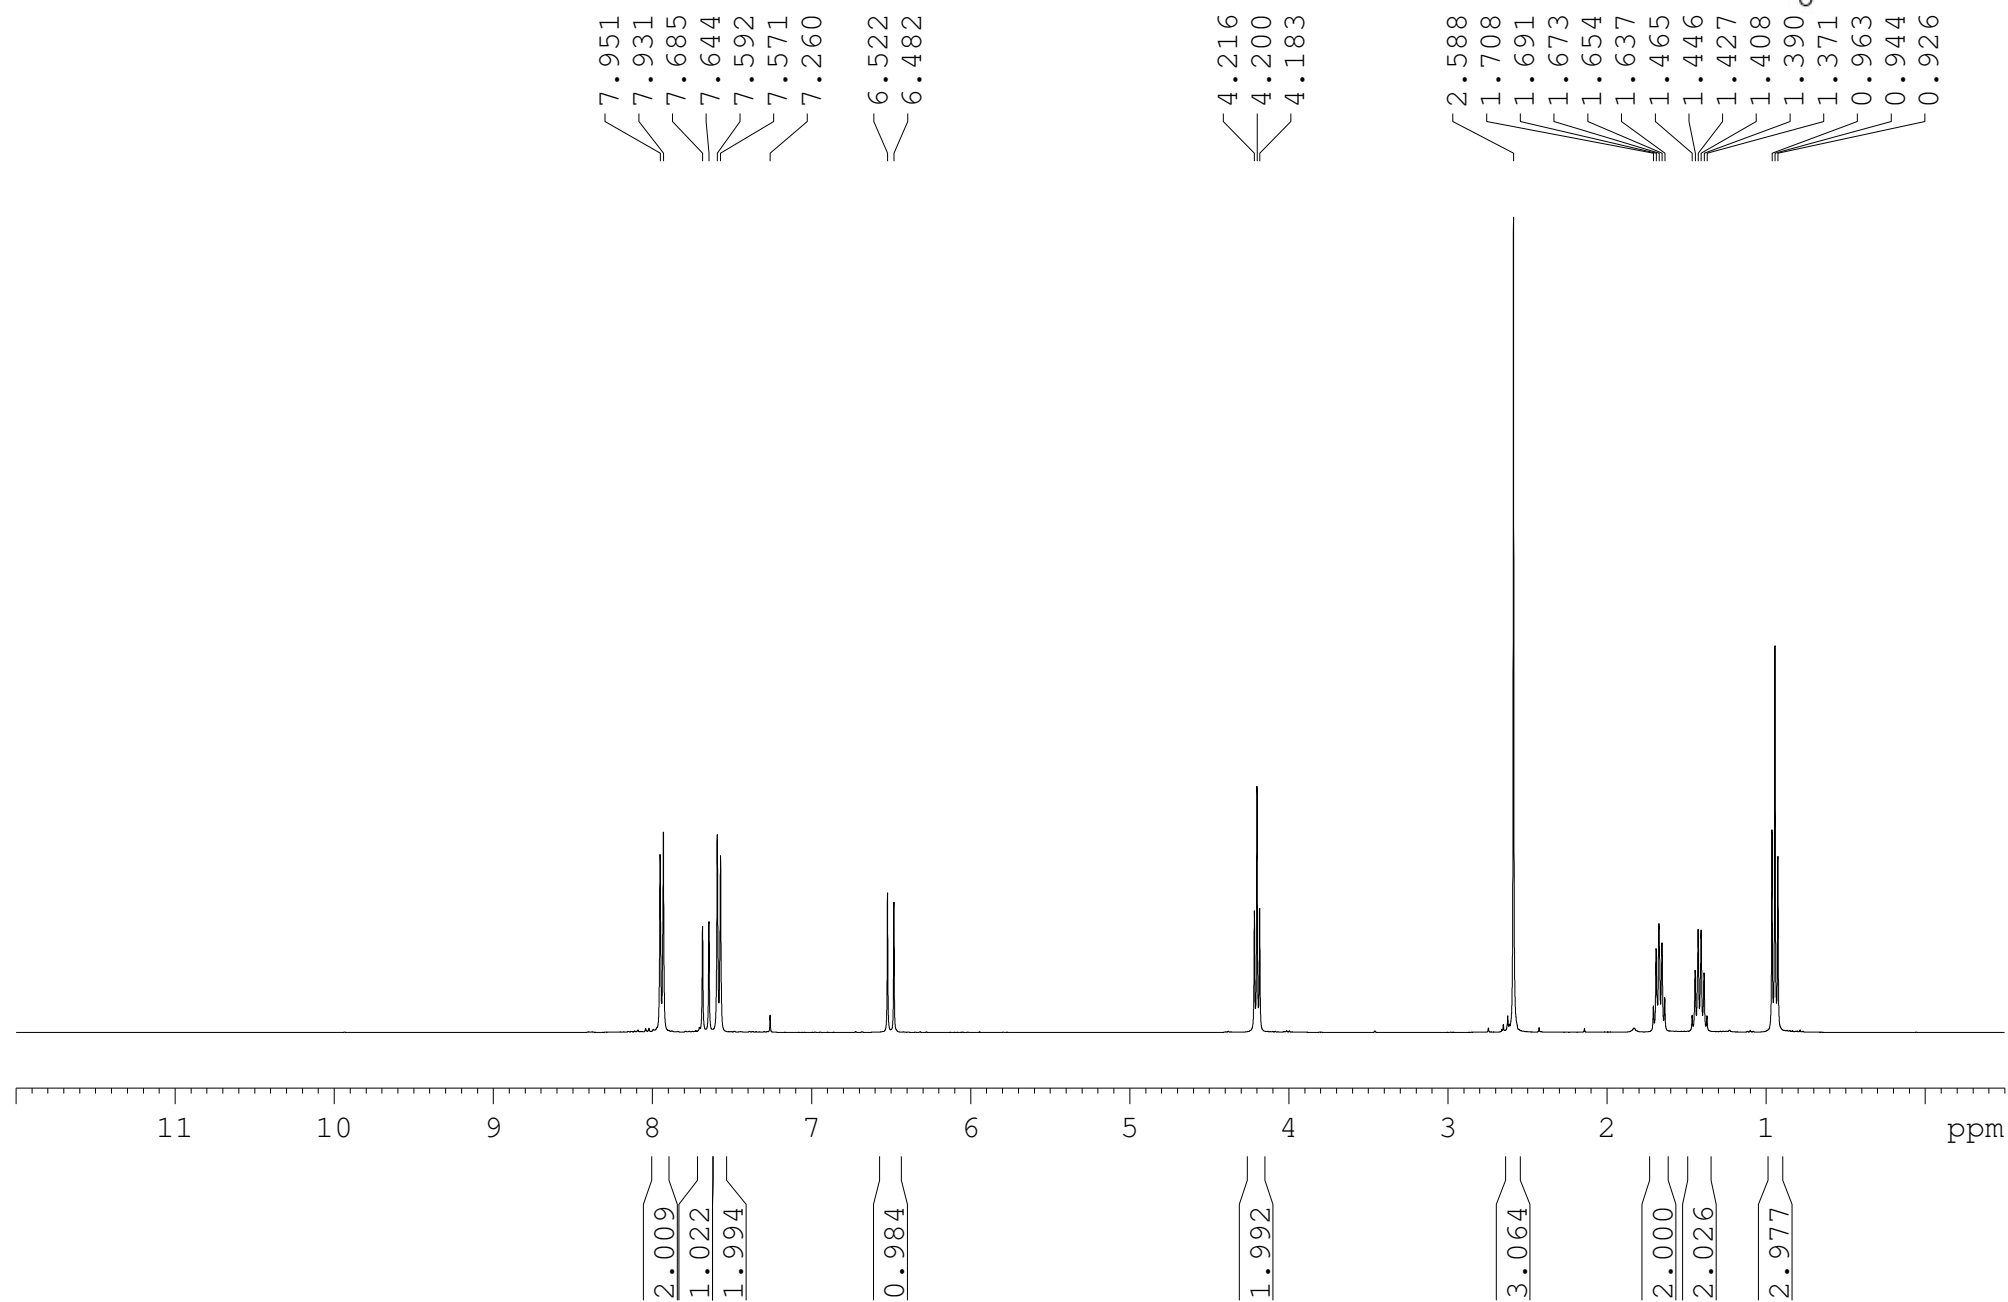

Butyl (E)-3-(4-acetylphenyl)acrylate (**8db**)

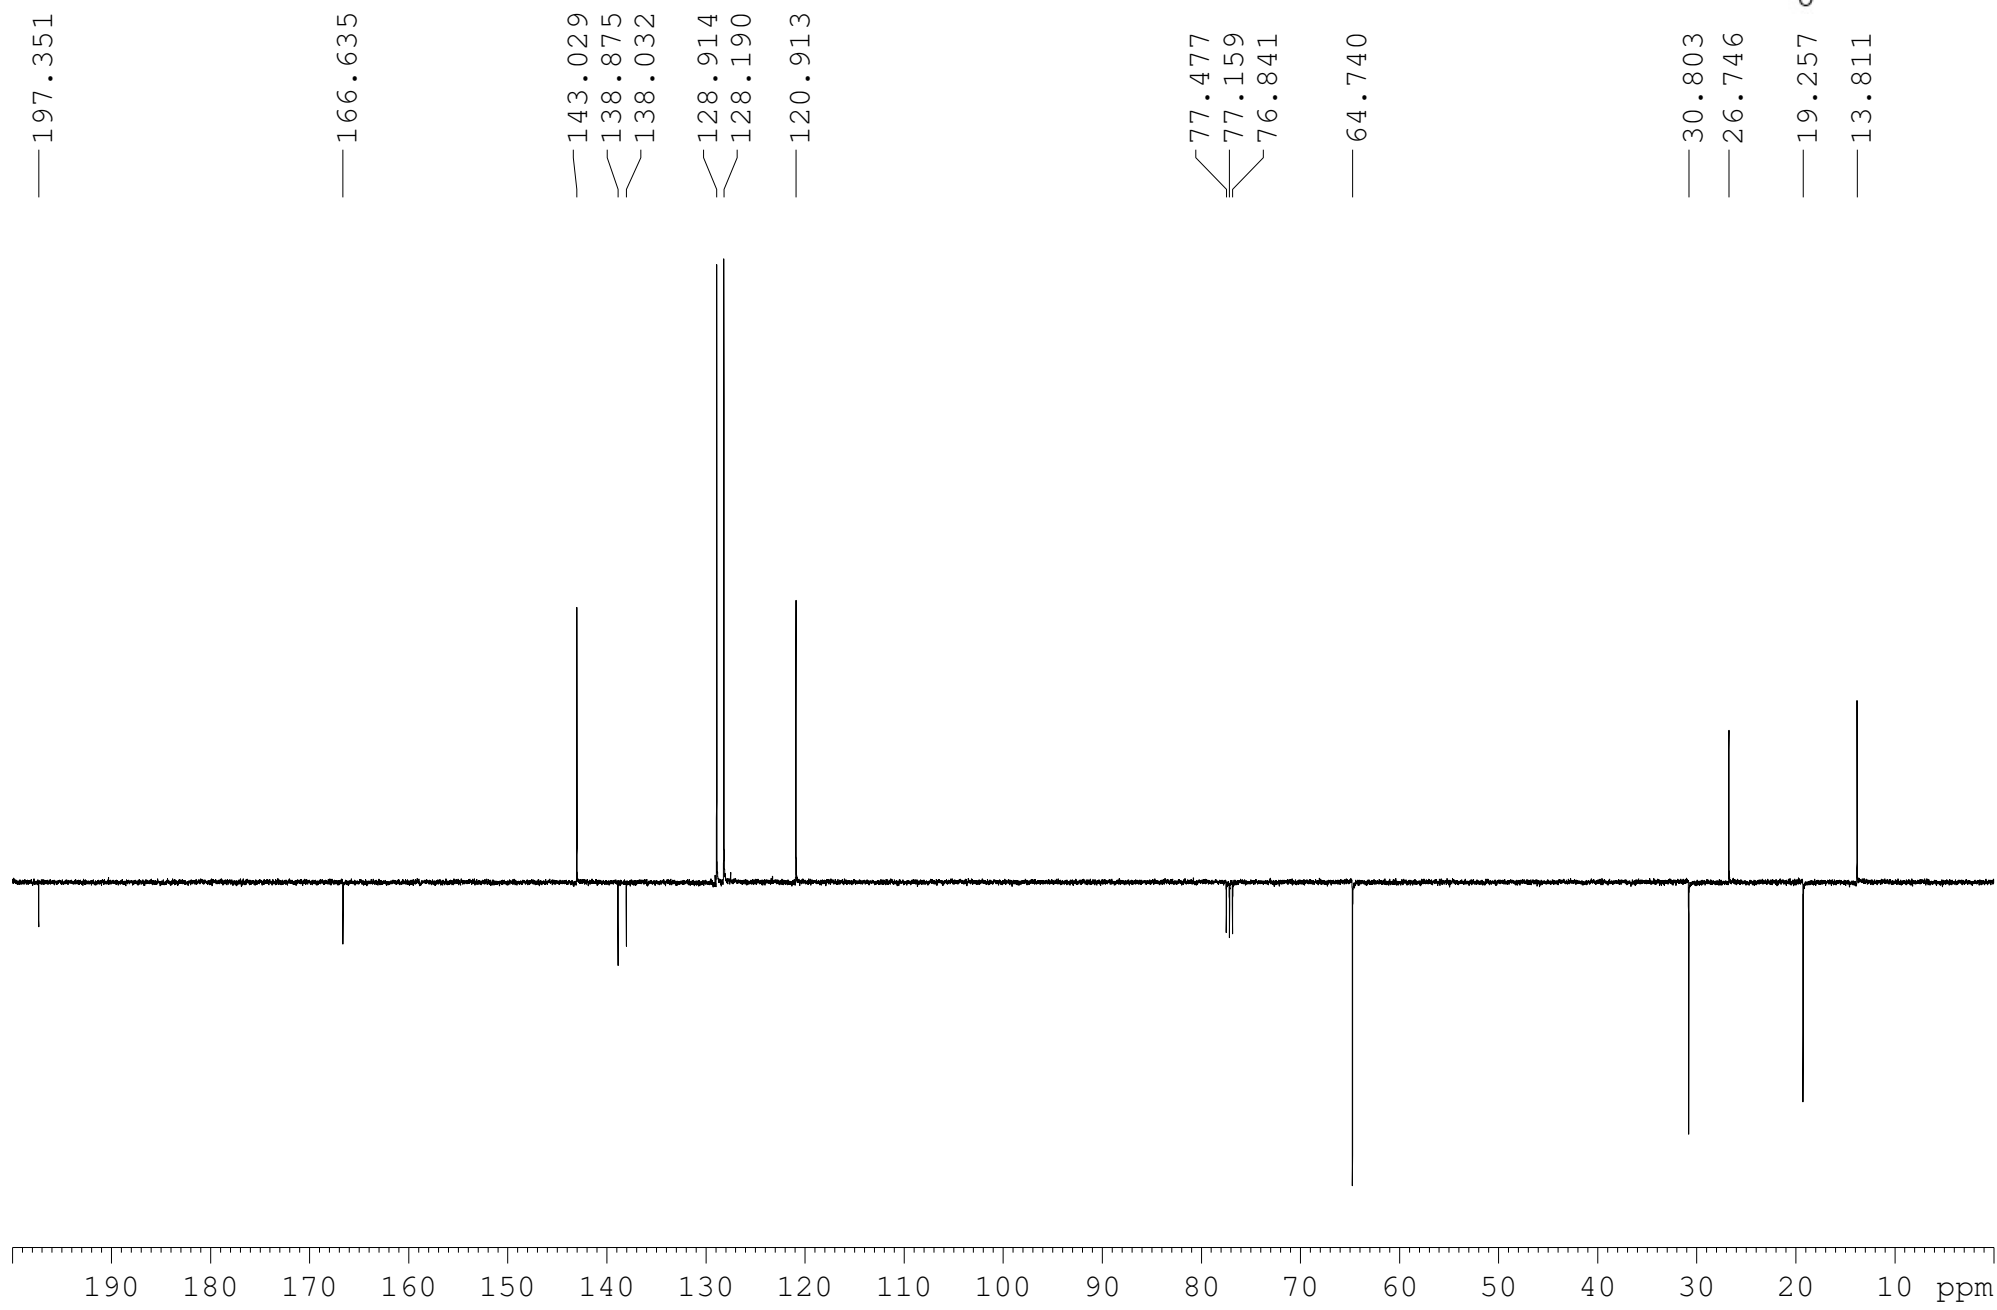

Methyl (E)-3-(thiophen-2-yl)acrylate (**8ca**)

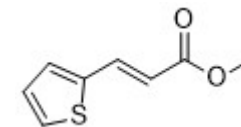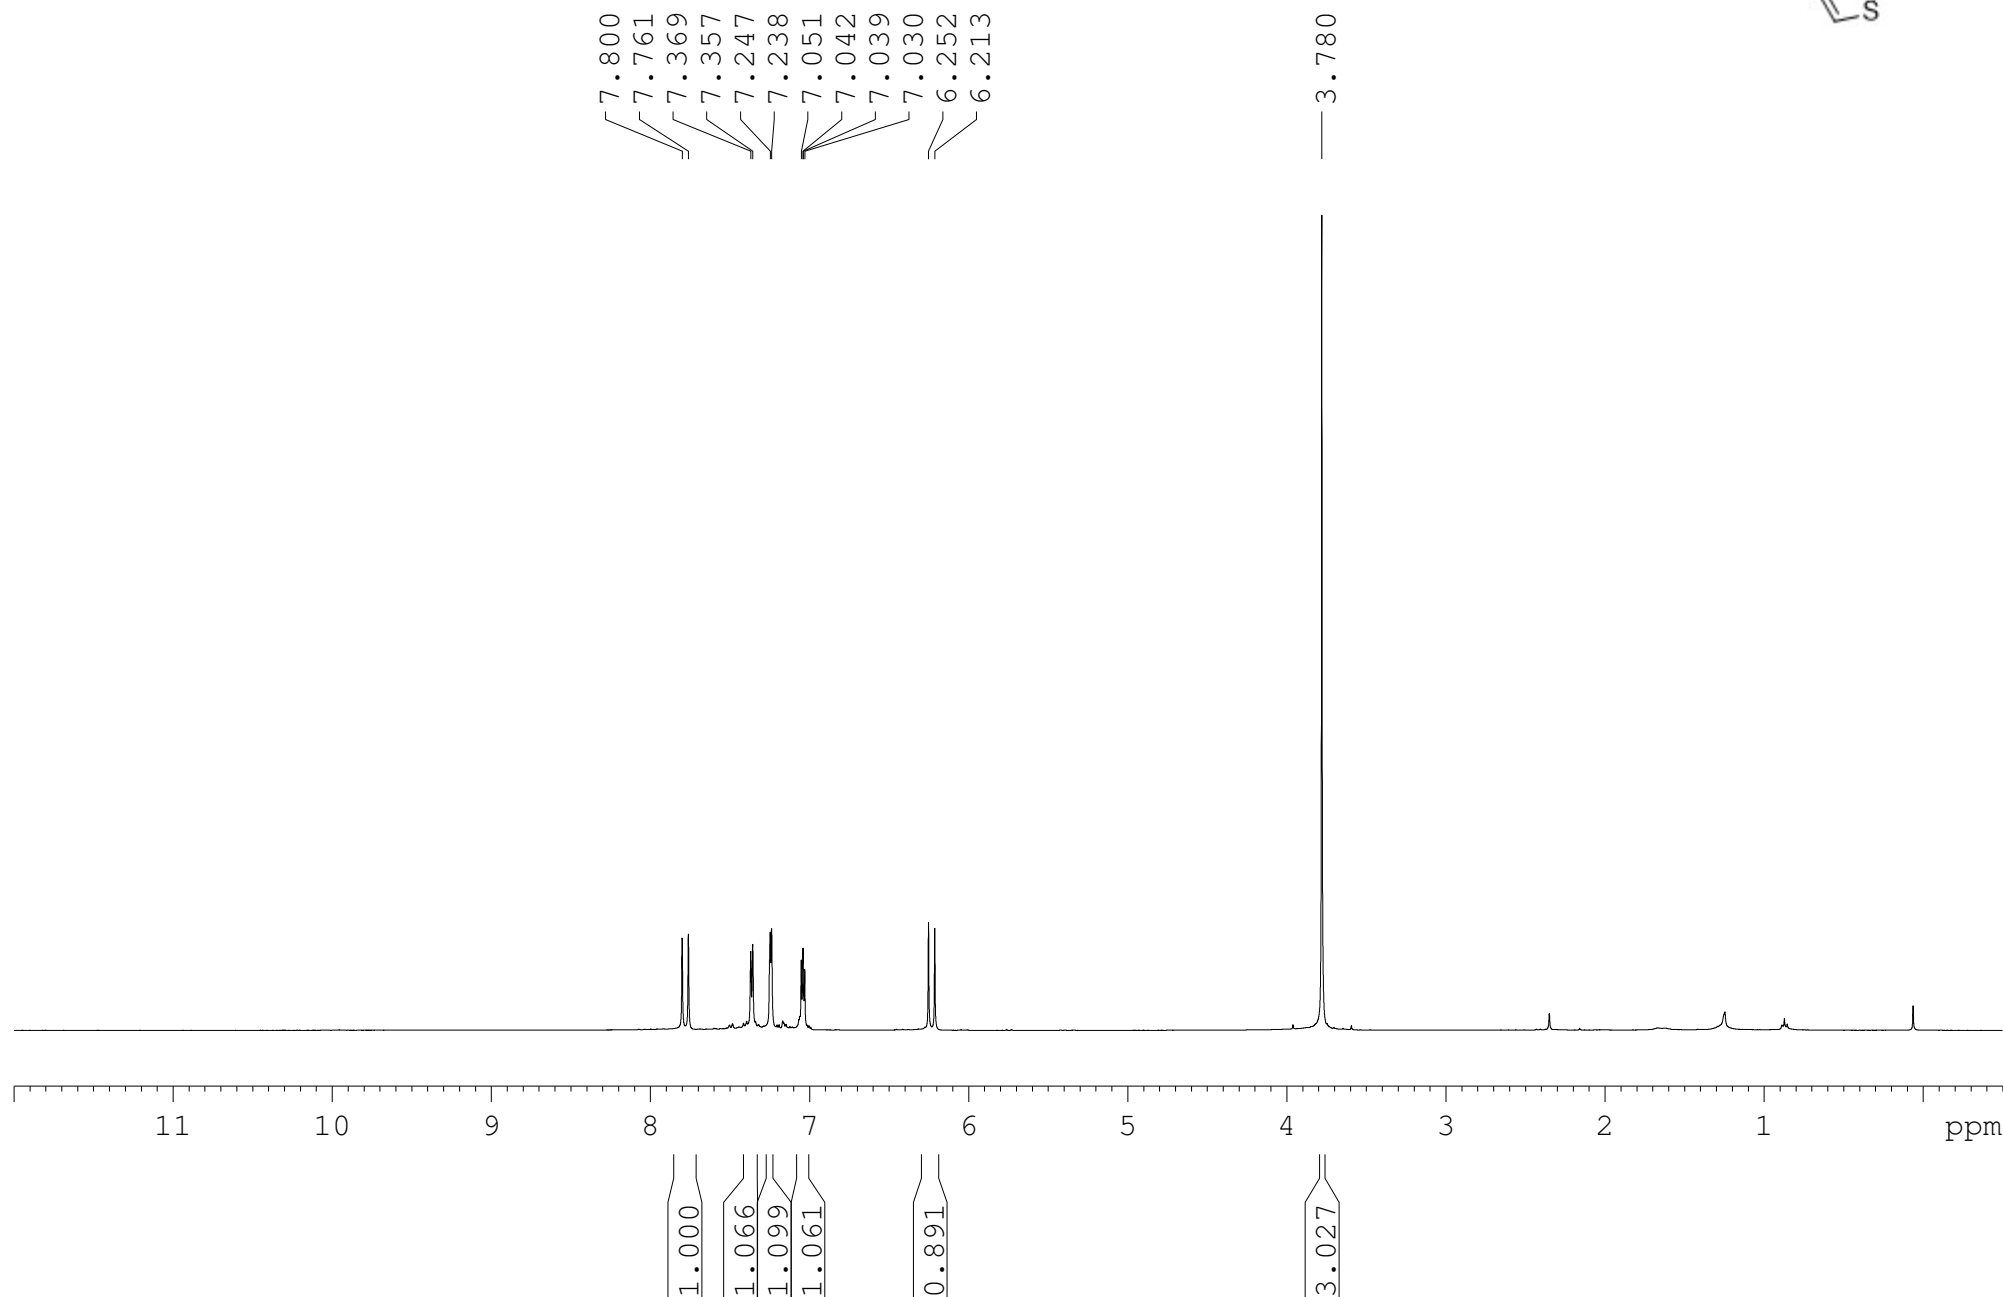

Methyl (E)-3-(thiophen-2-yl)acrylate (**8ca**)

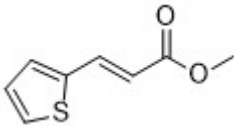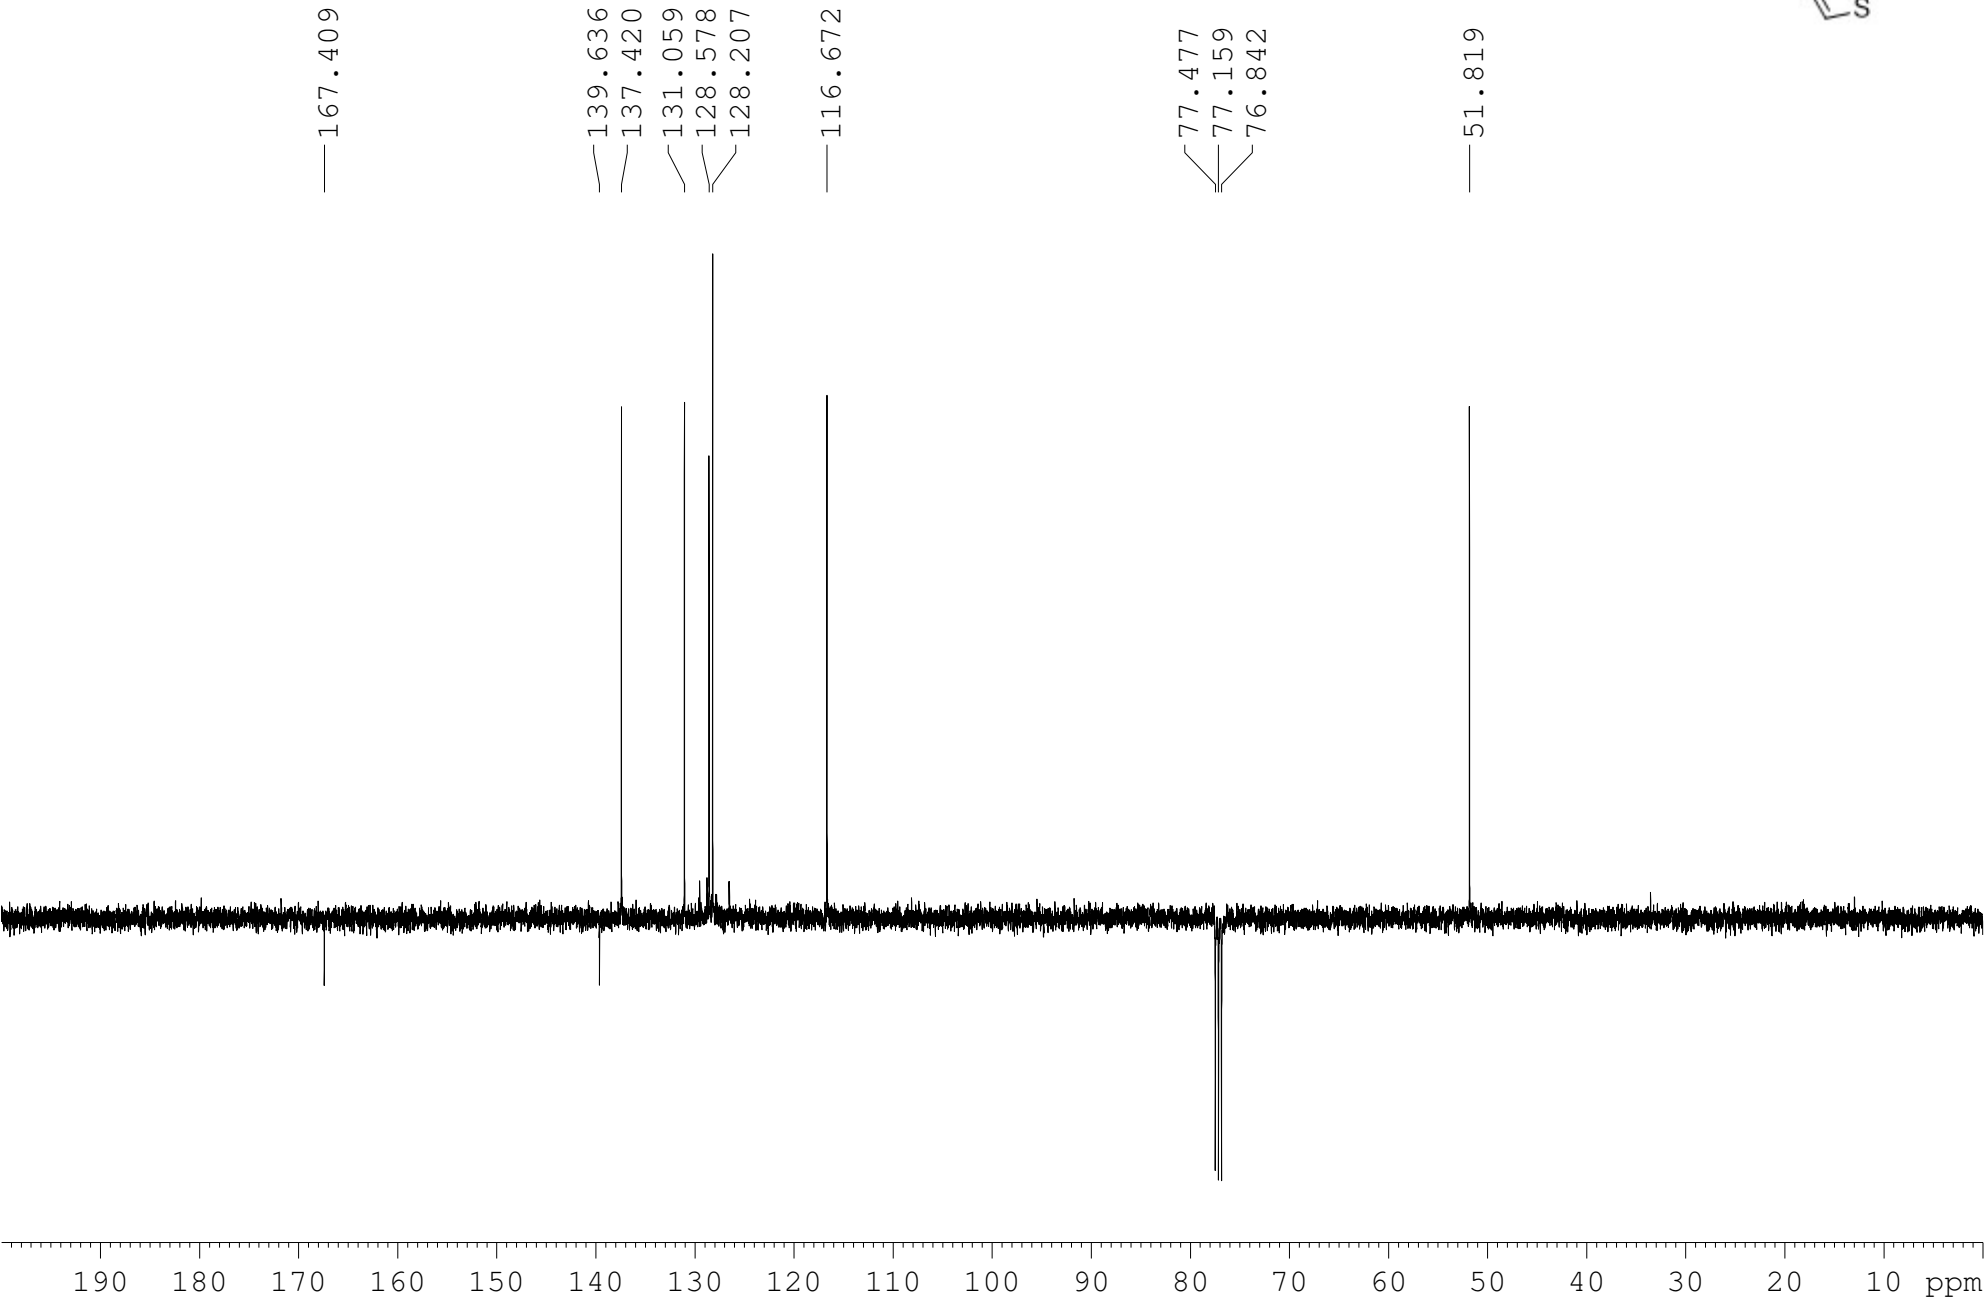

Butyl (E)-3-(thiophen-2-yl)acrylate (**8eb**)

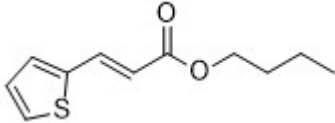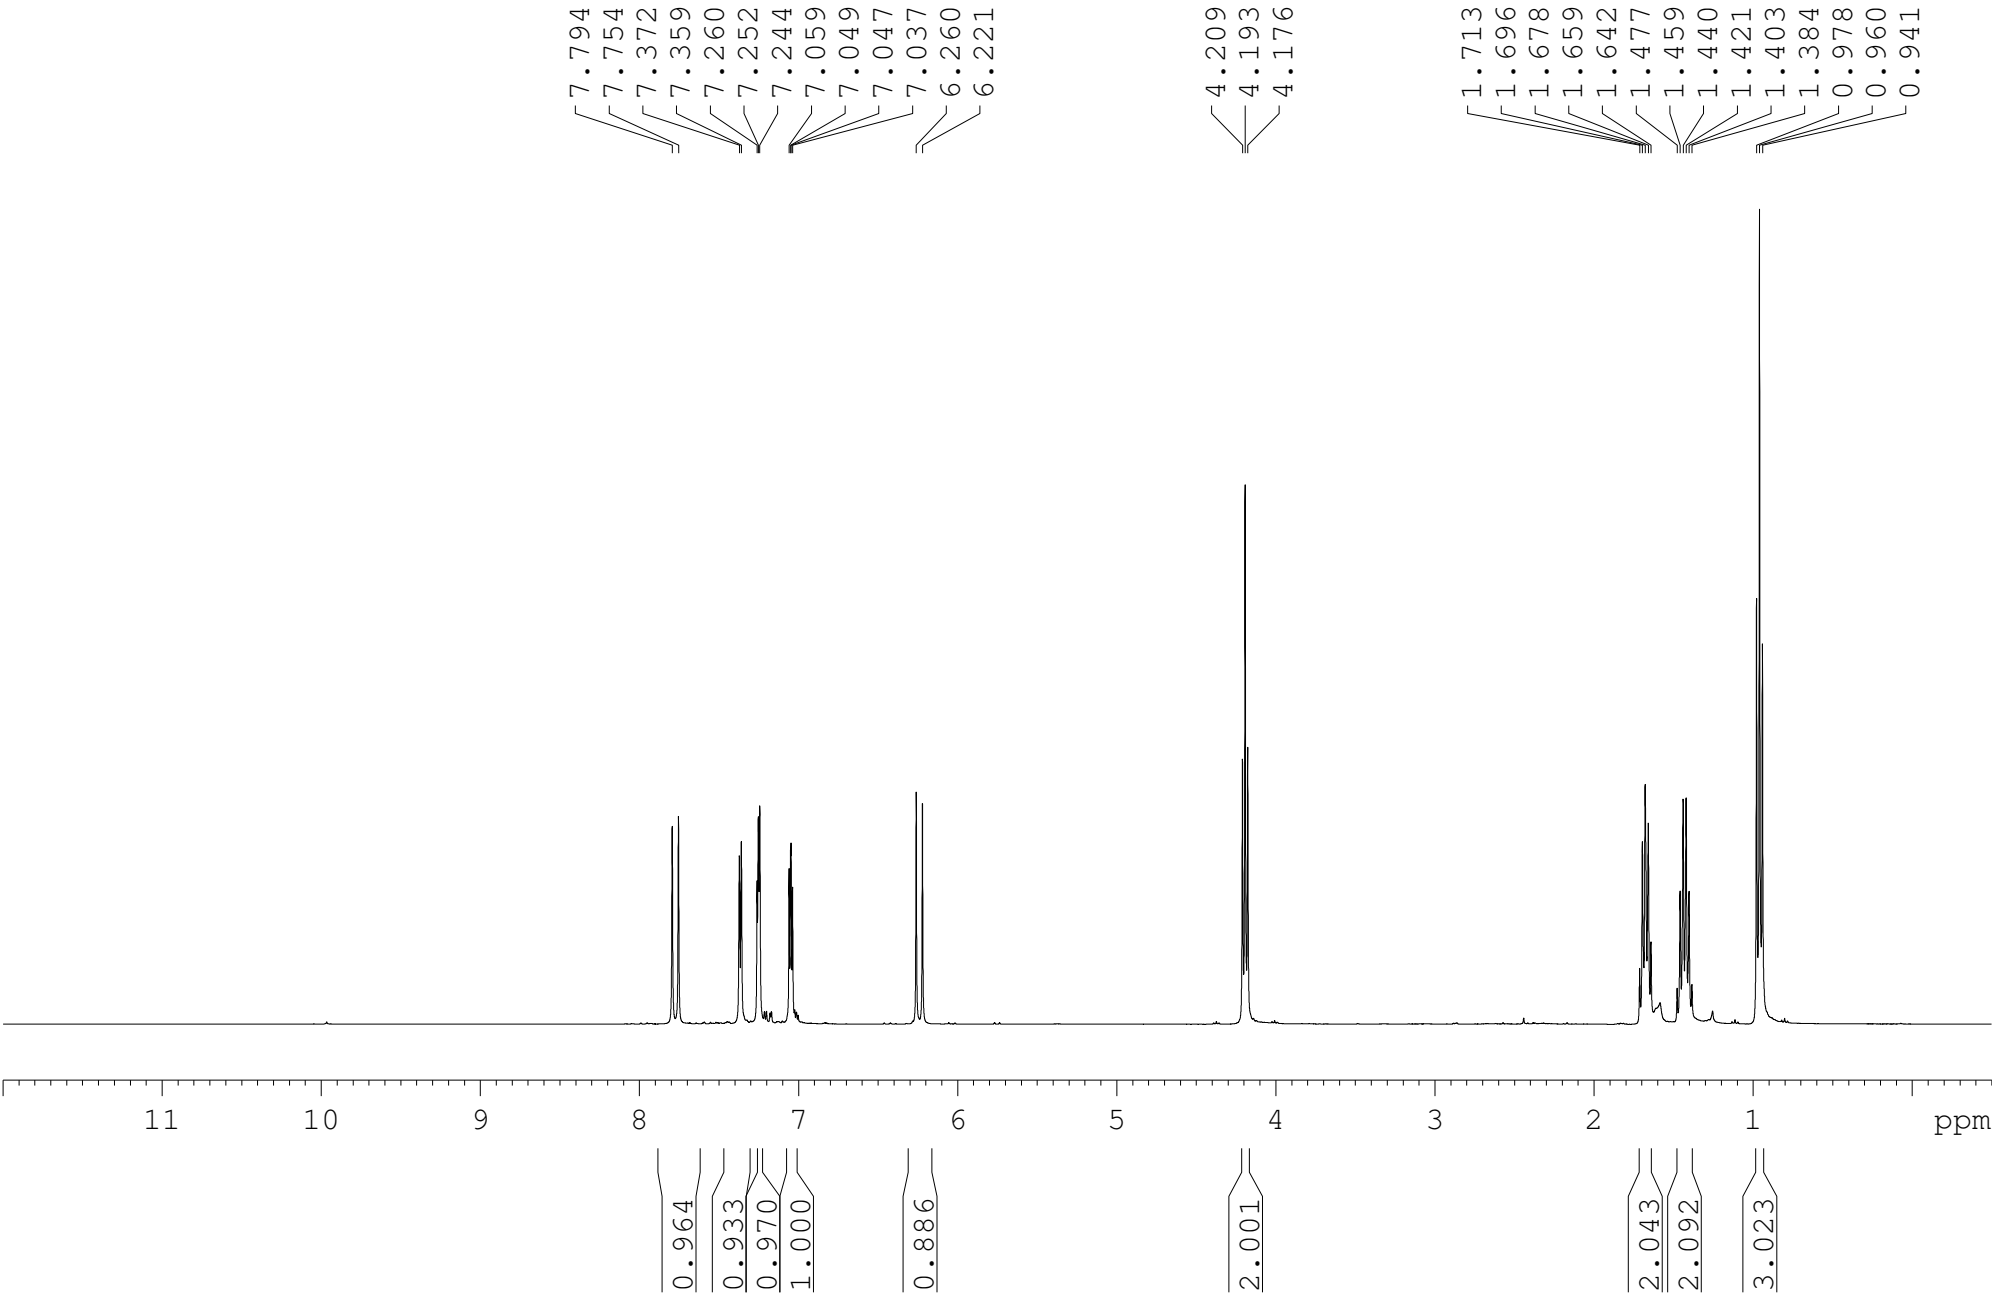



Butyl (E)-3-(thiophen-2-yl)acrylate (**8eb**)

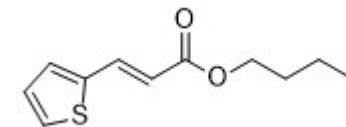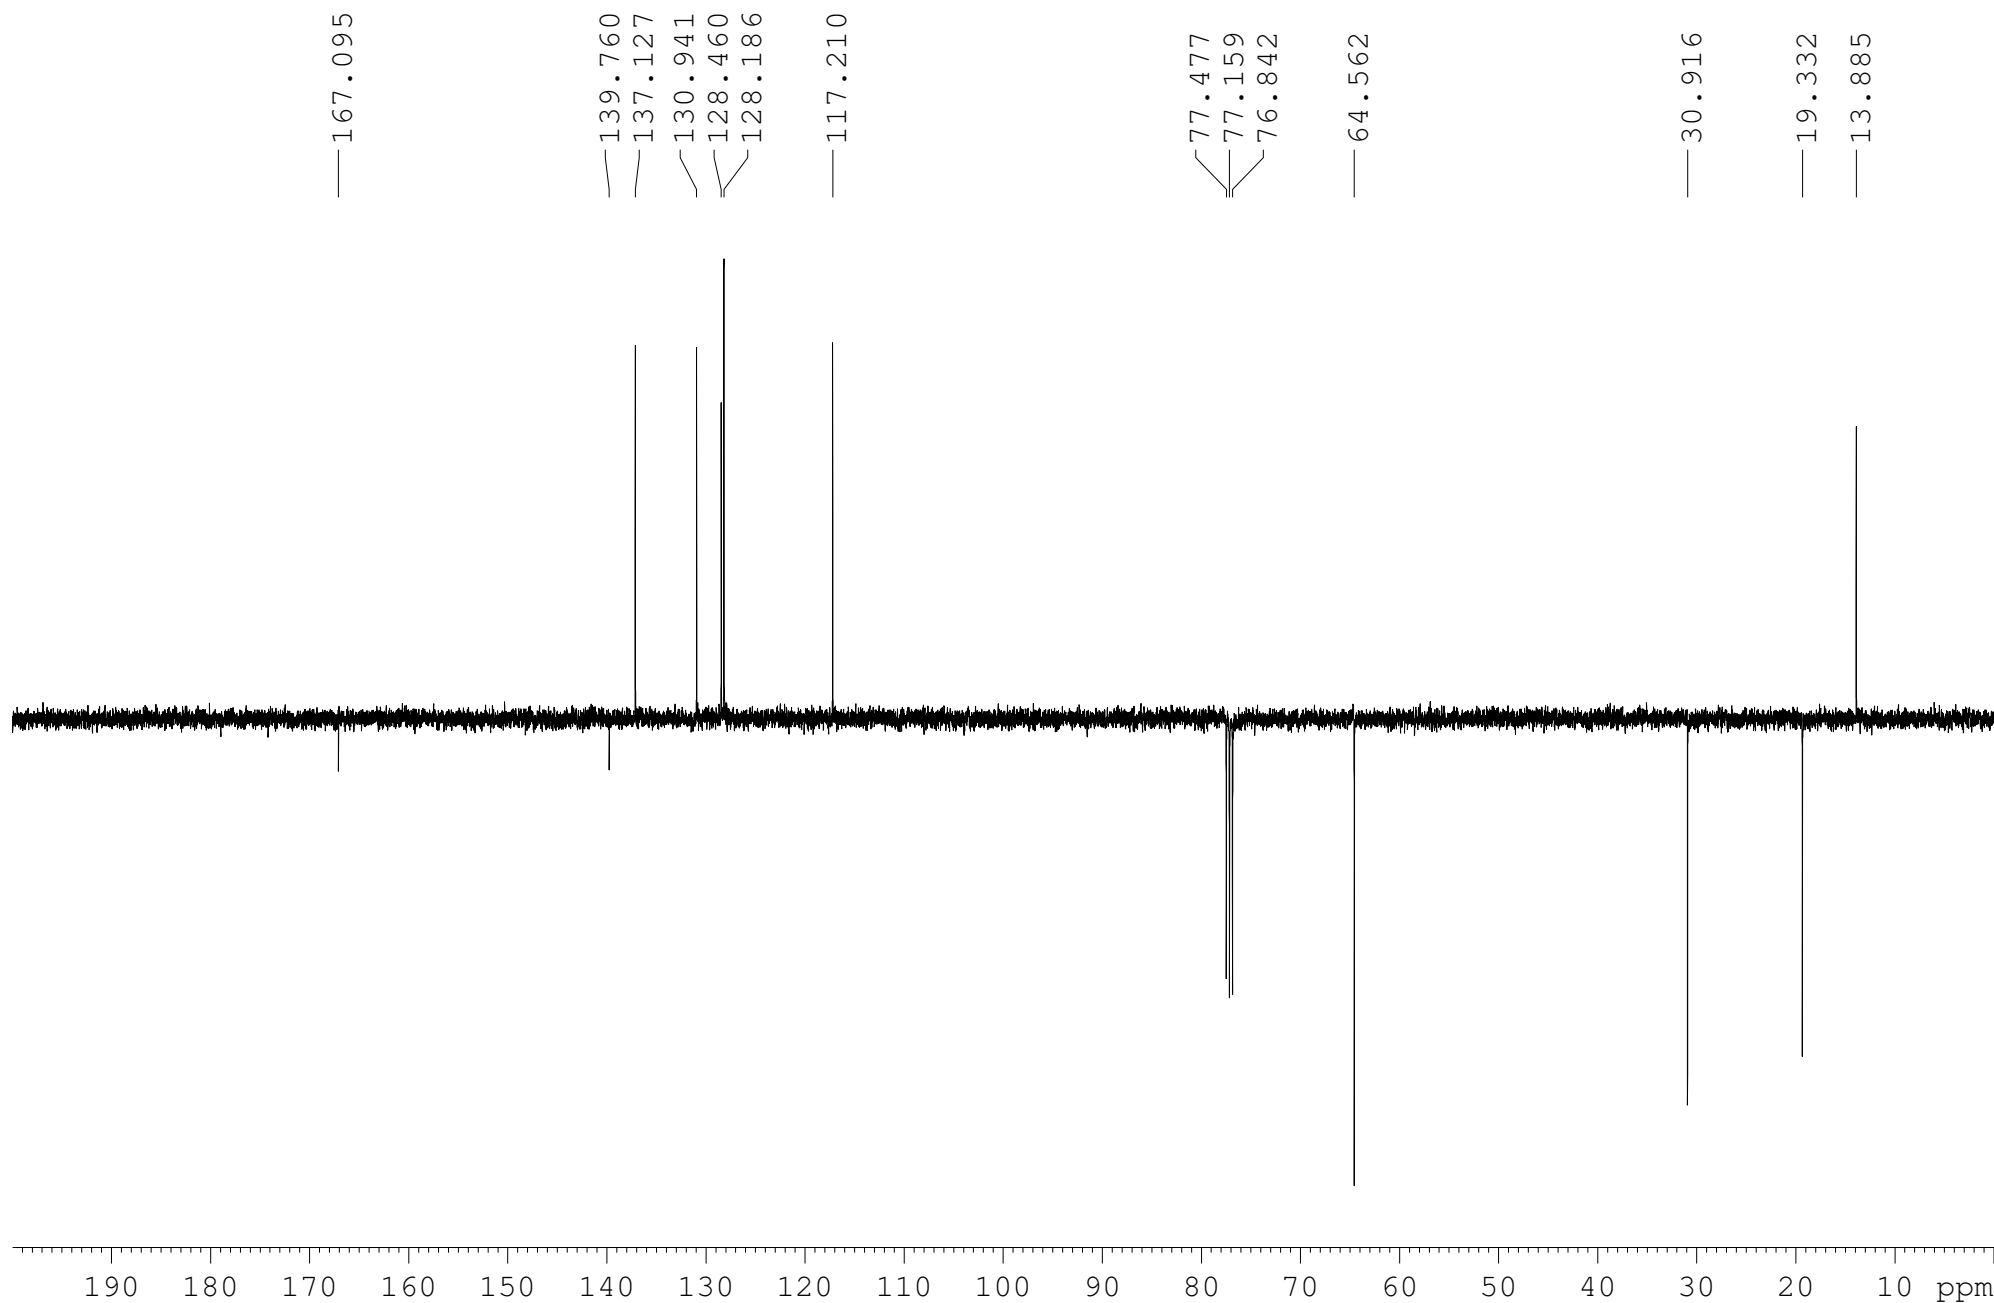

(E)-stylbene (**10aa**)

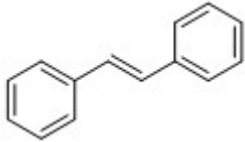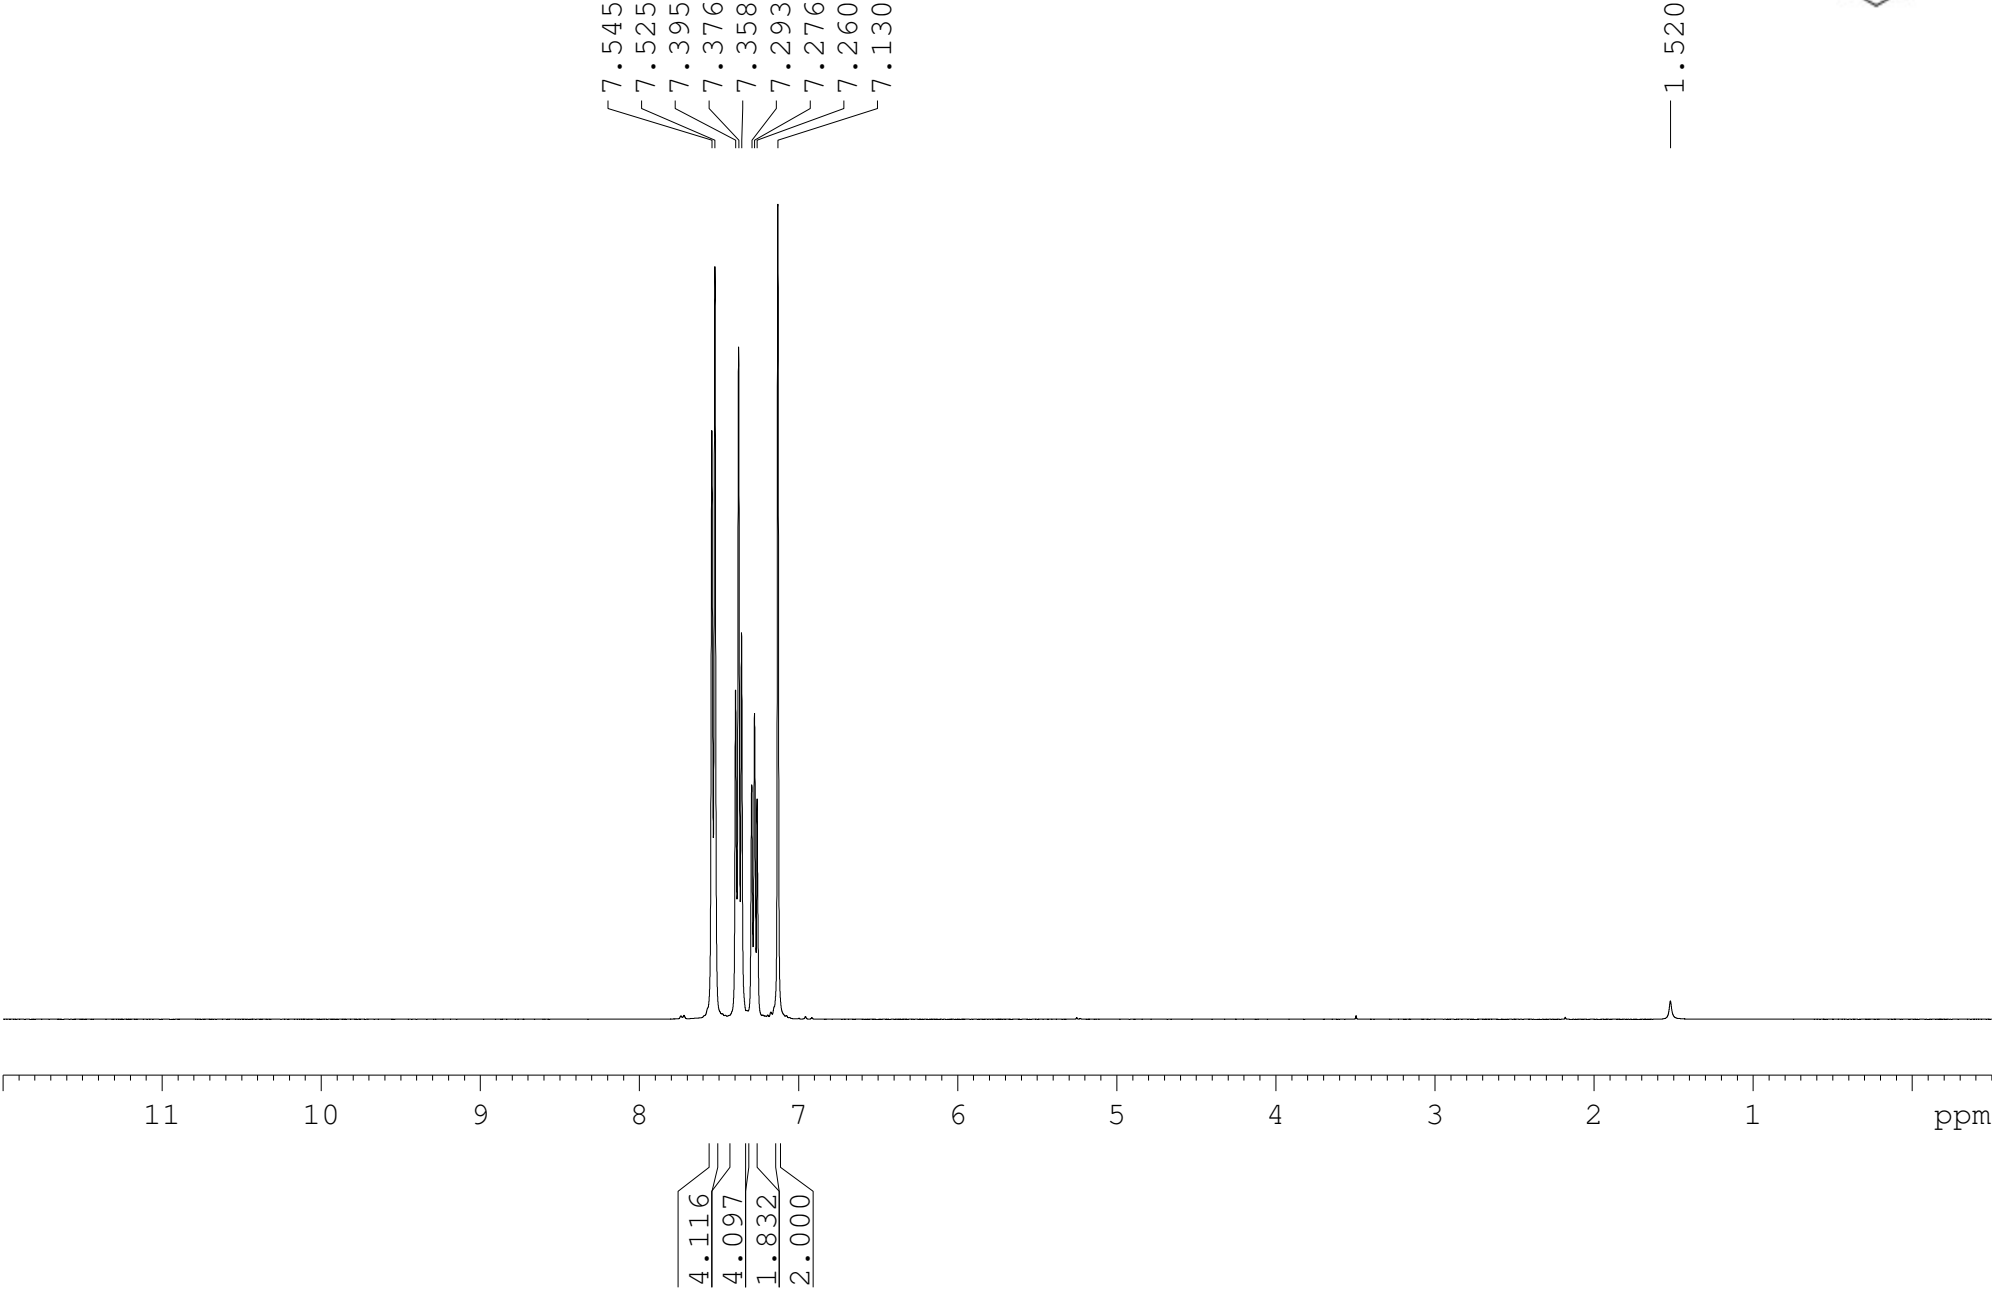

(E)-stylbene (**10aa**)

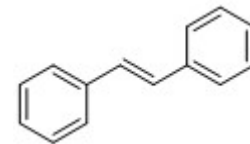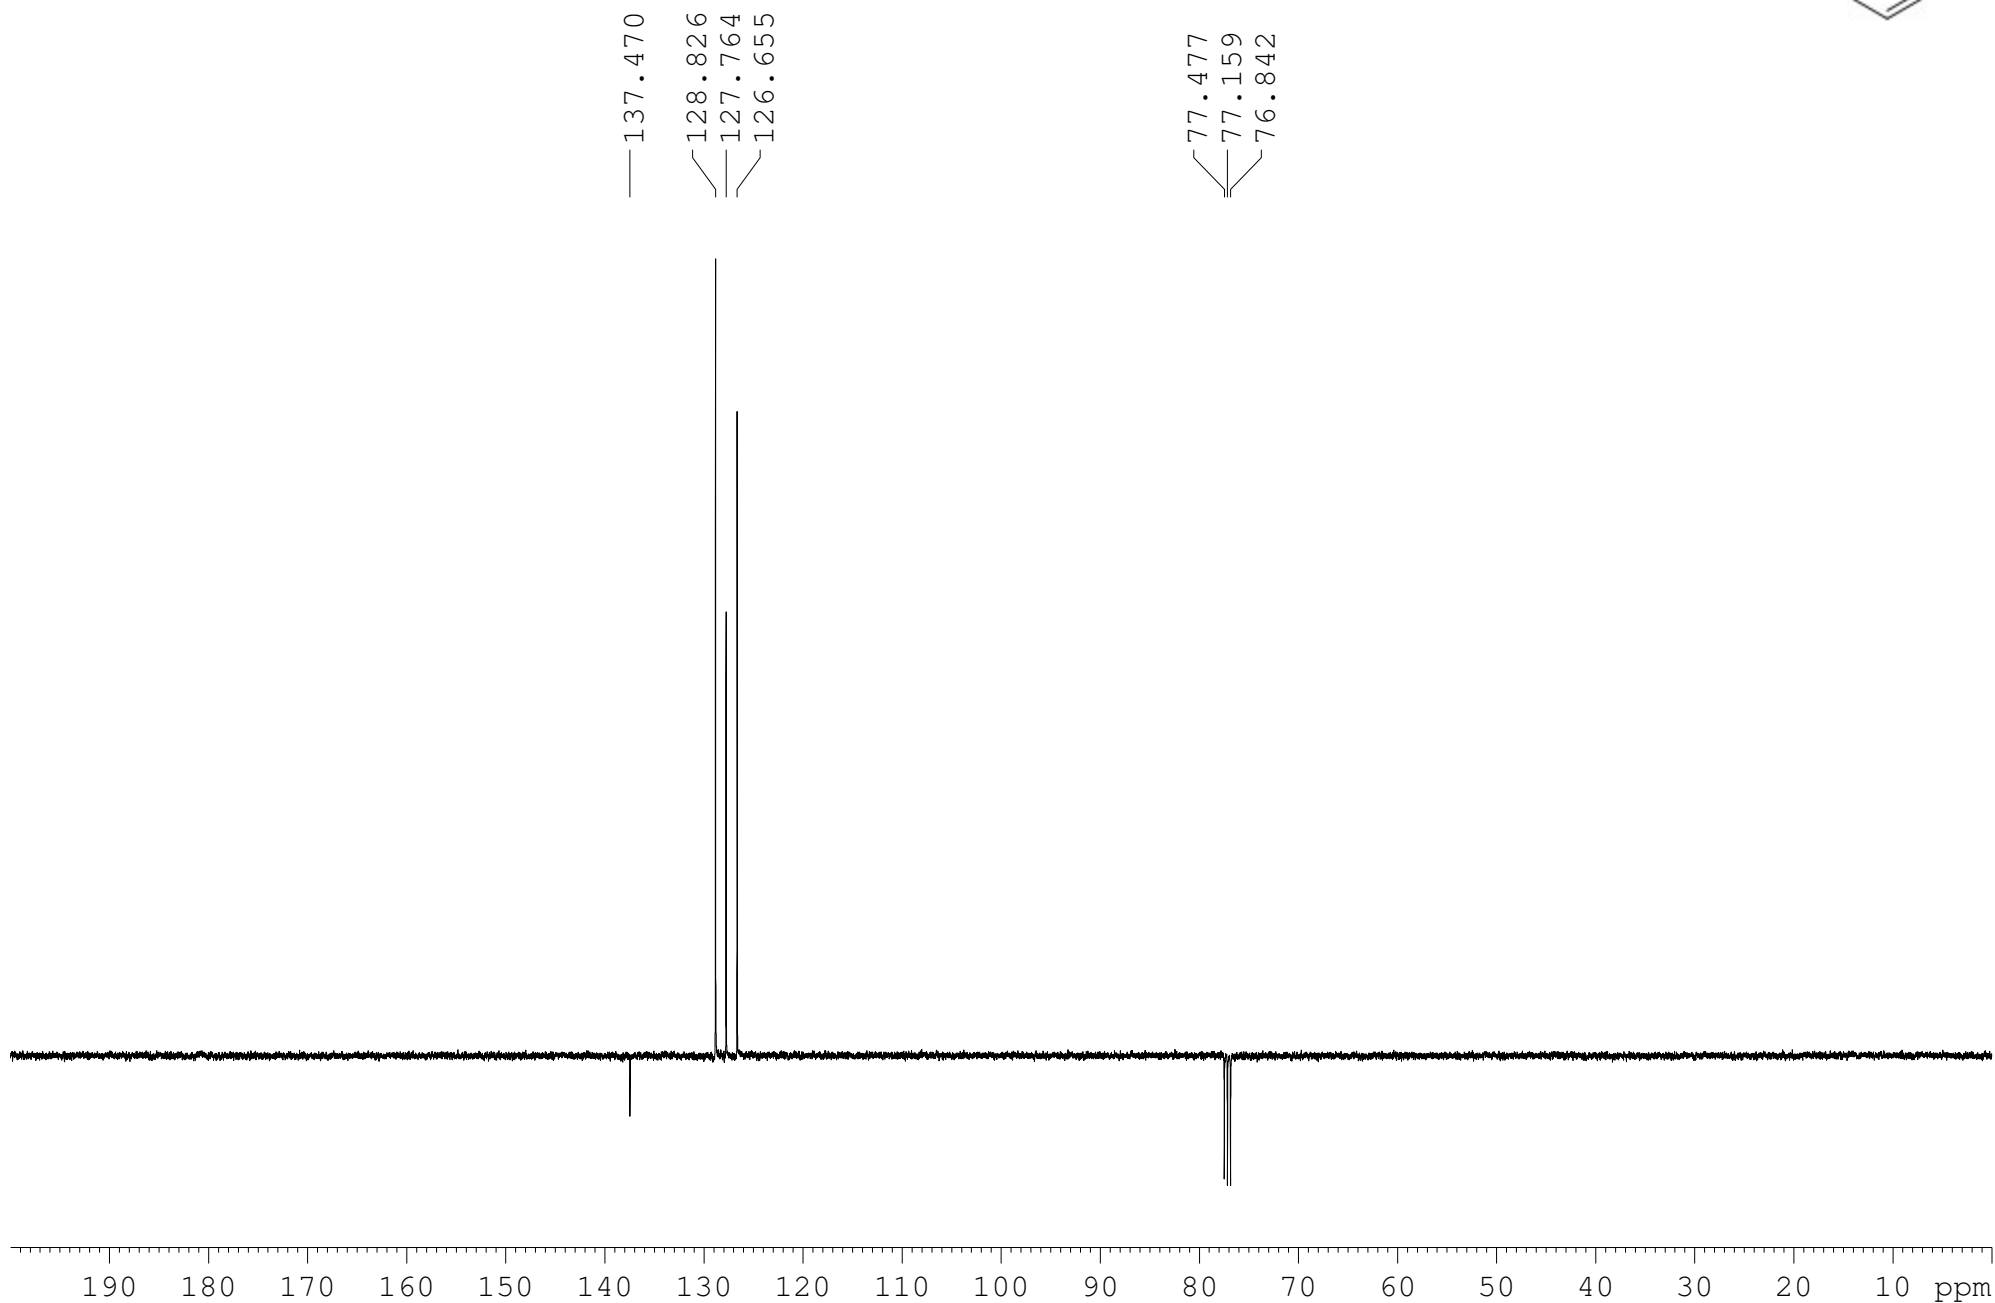

(E)-1-chloro-4-styrylbenzene (**10ab**)

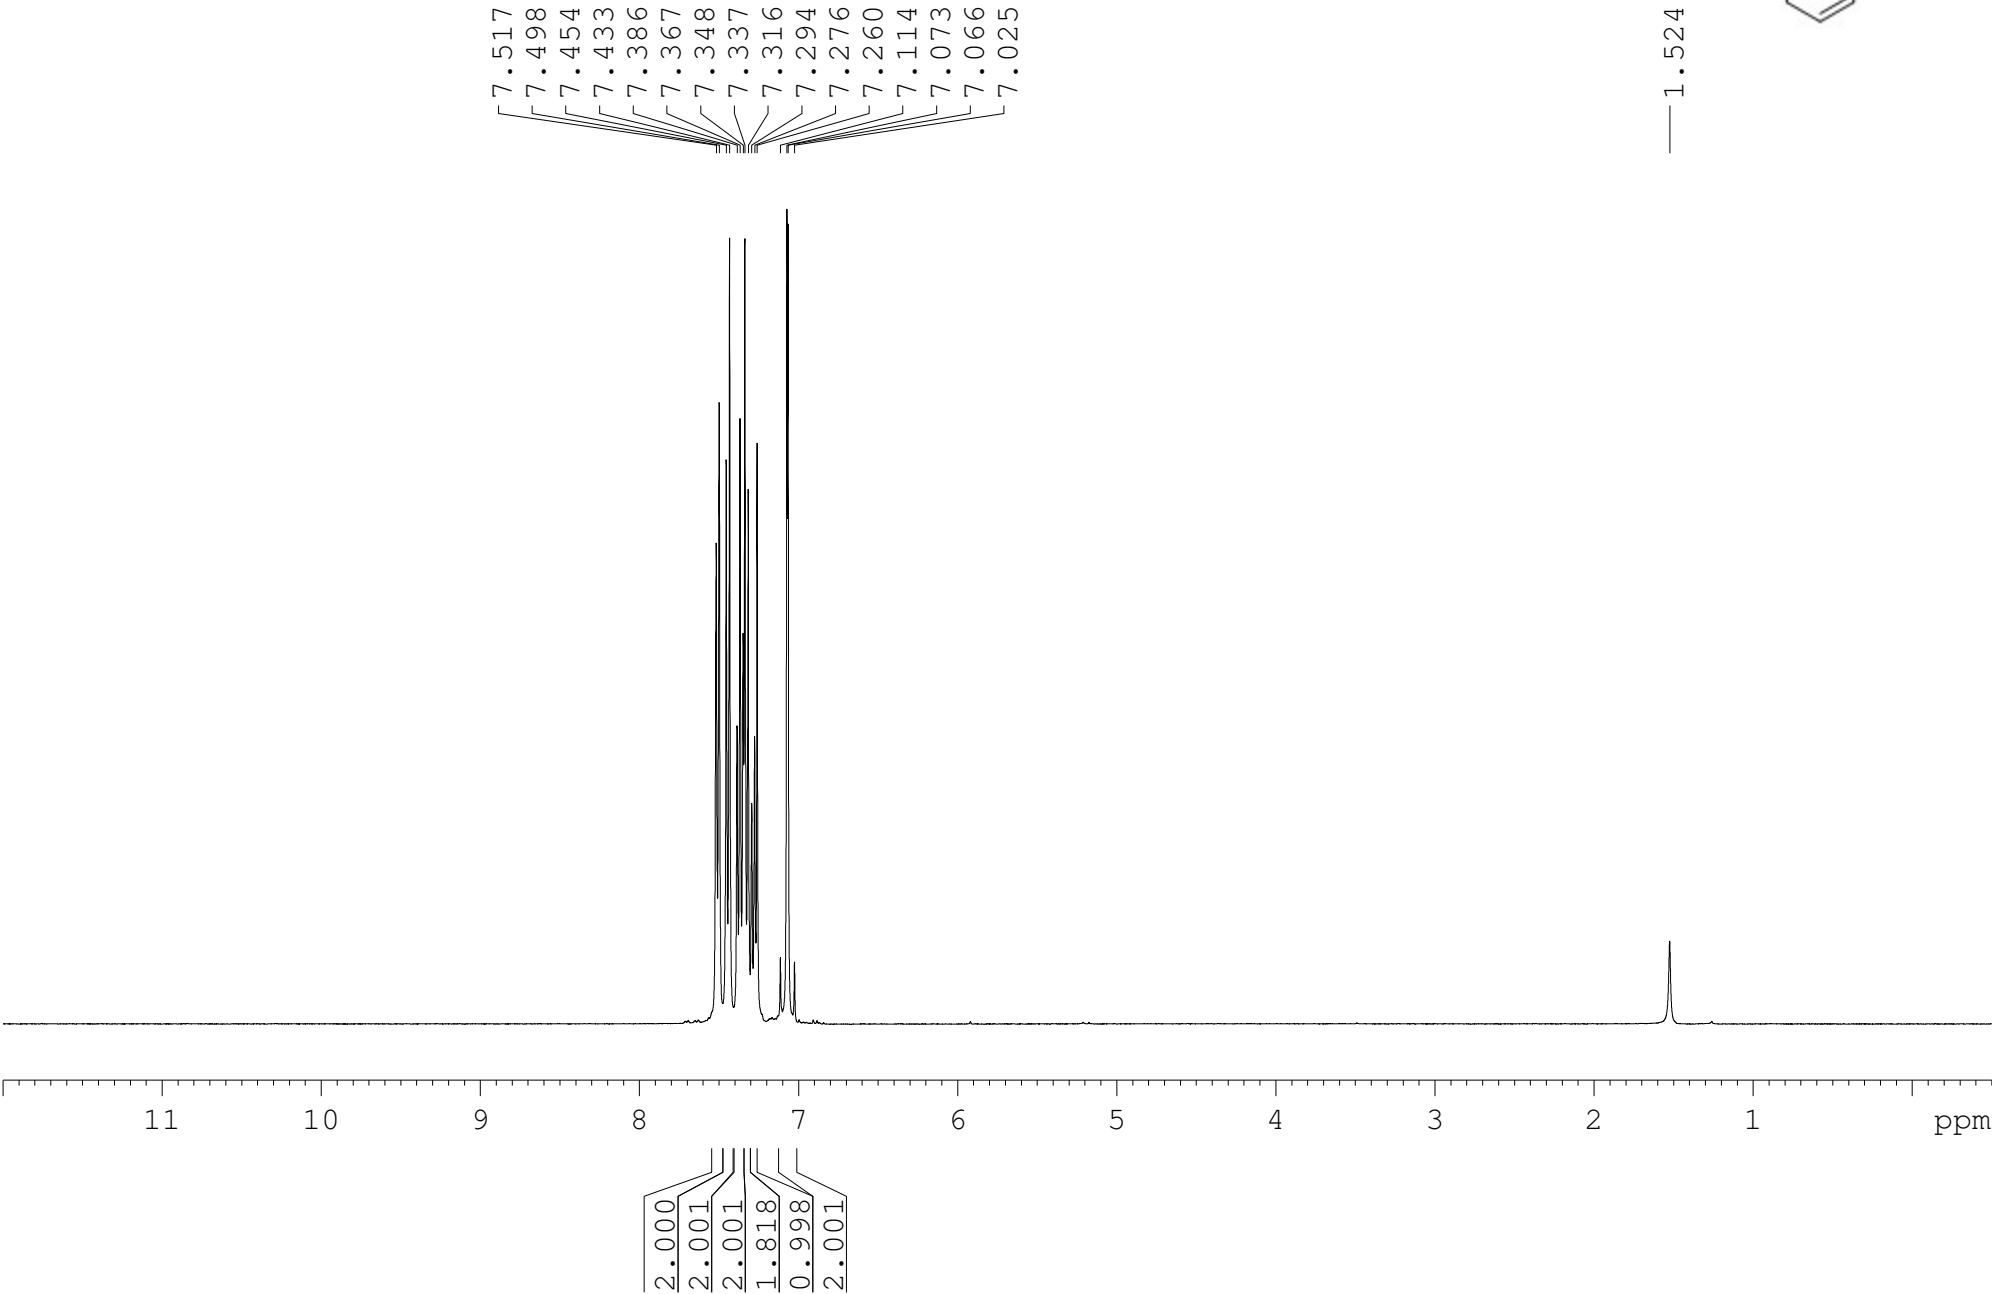

(E)-1-chloro-4-styrylbenzene (**10ab**)

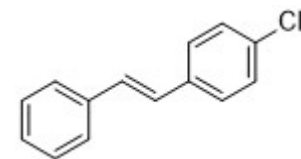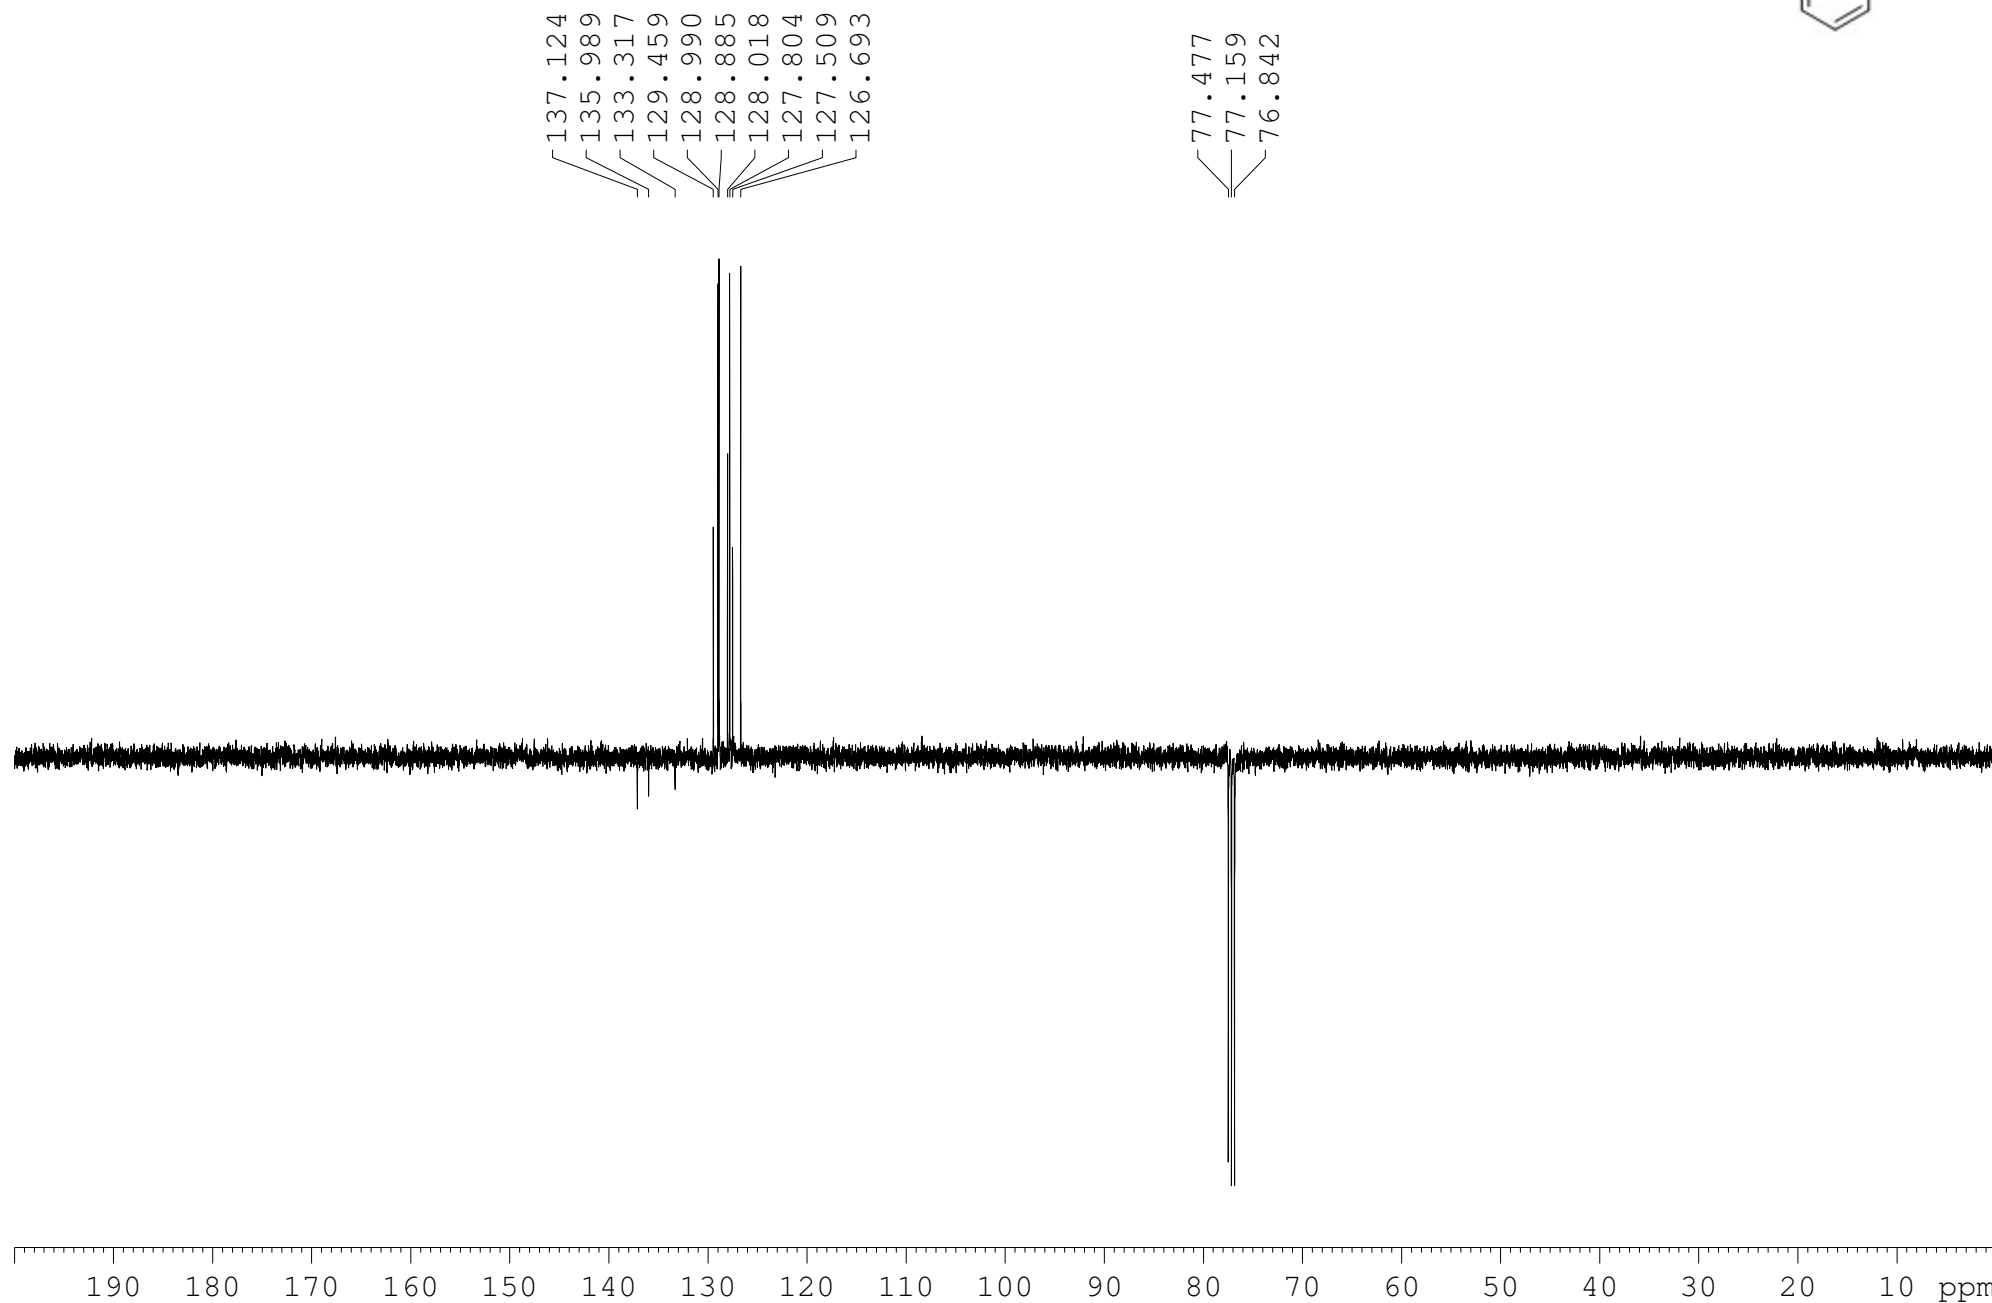

(E)-1-methyl-4-styrylbenzene (**10ba**)

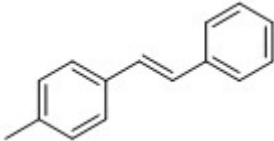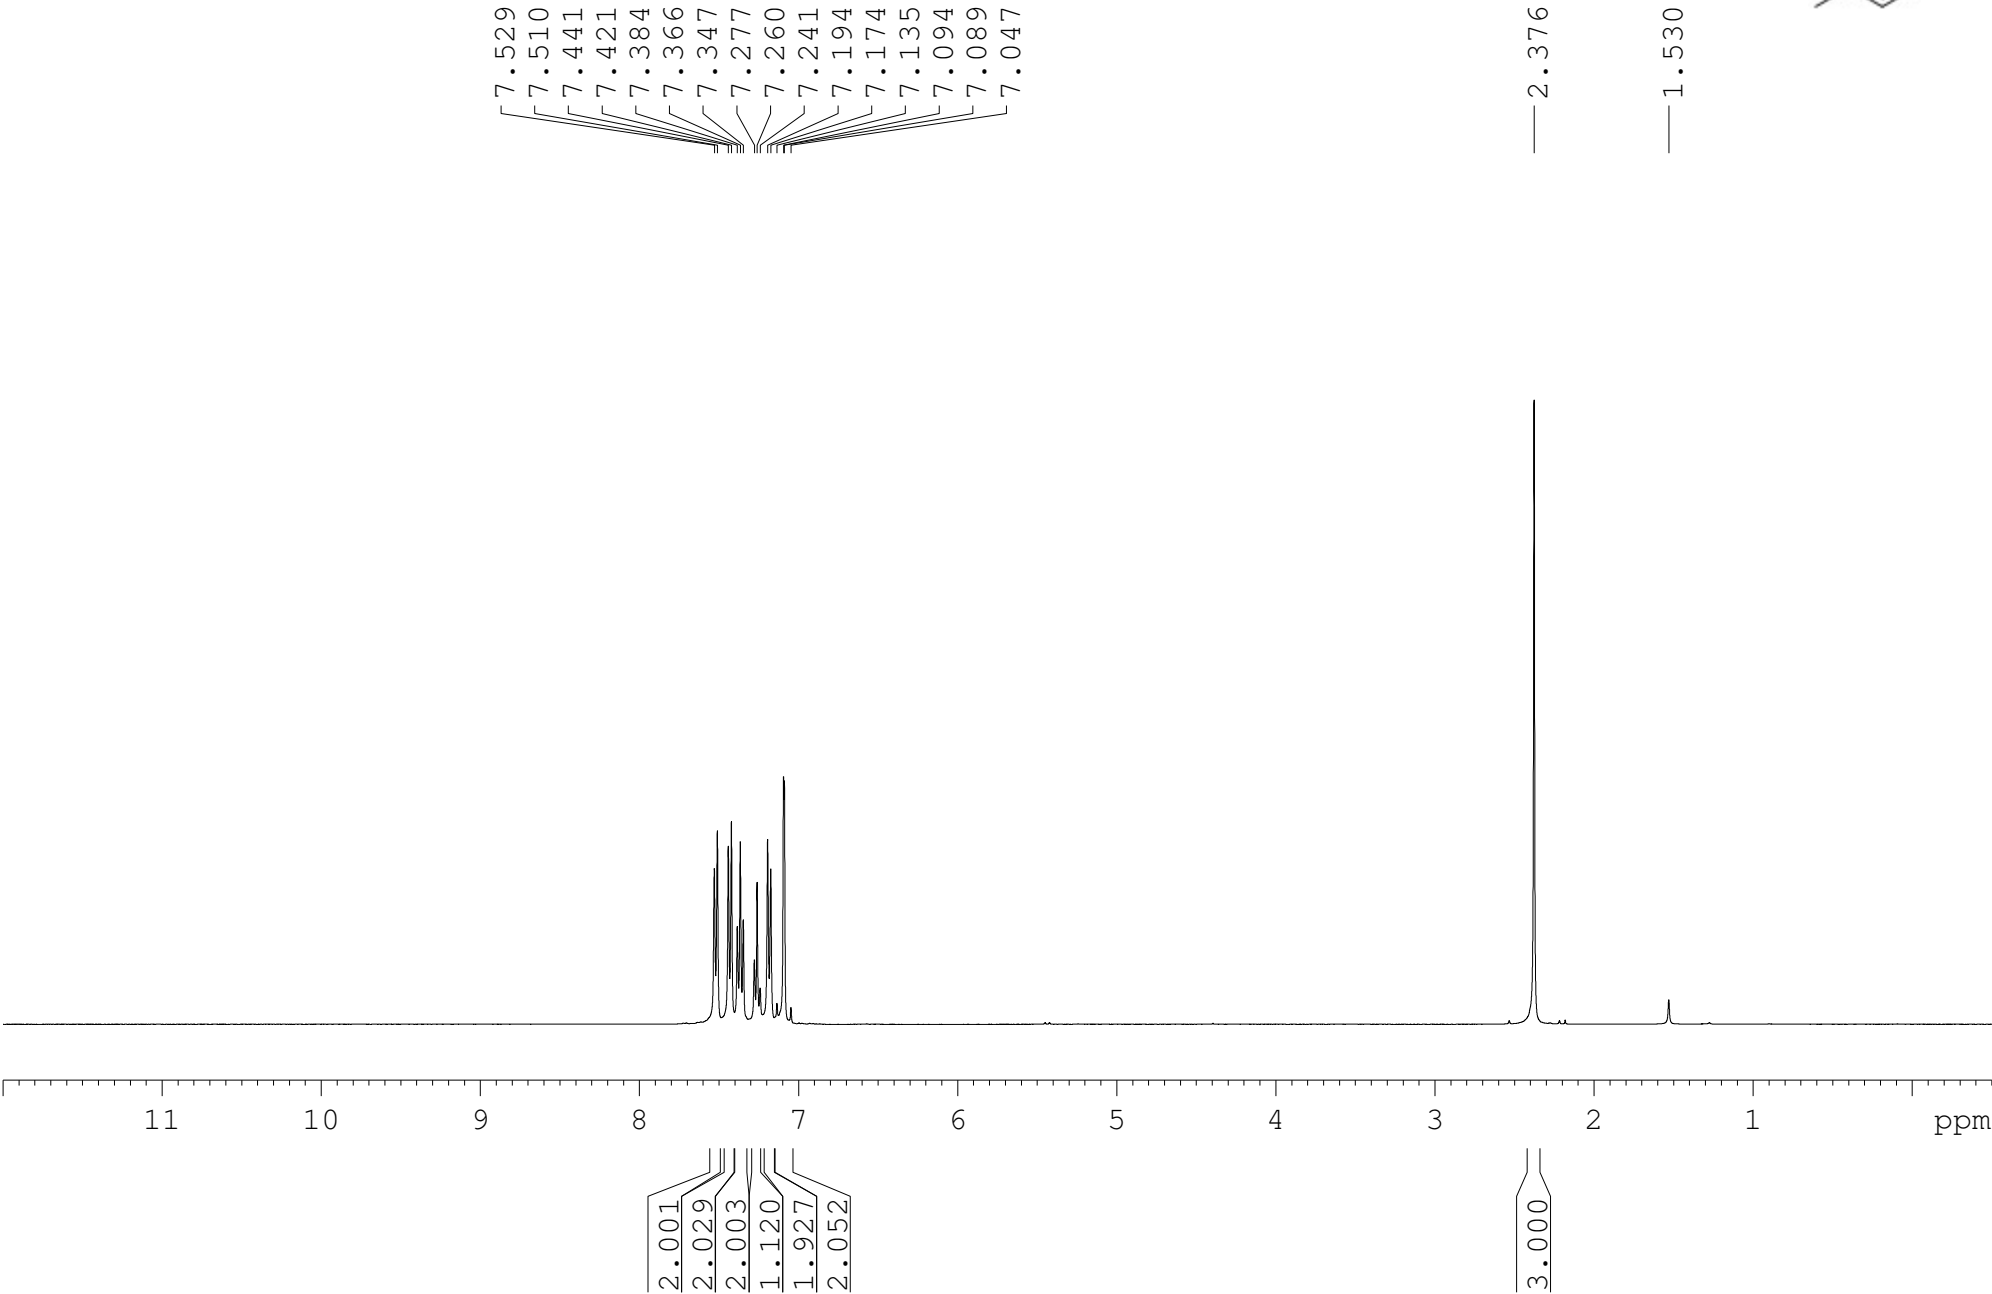

(E)-1-methyl-4-styrylbenzene (**10ba**)

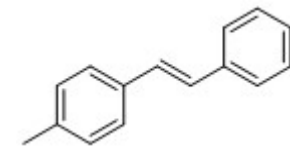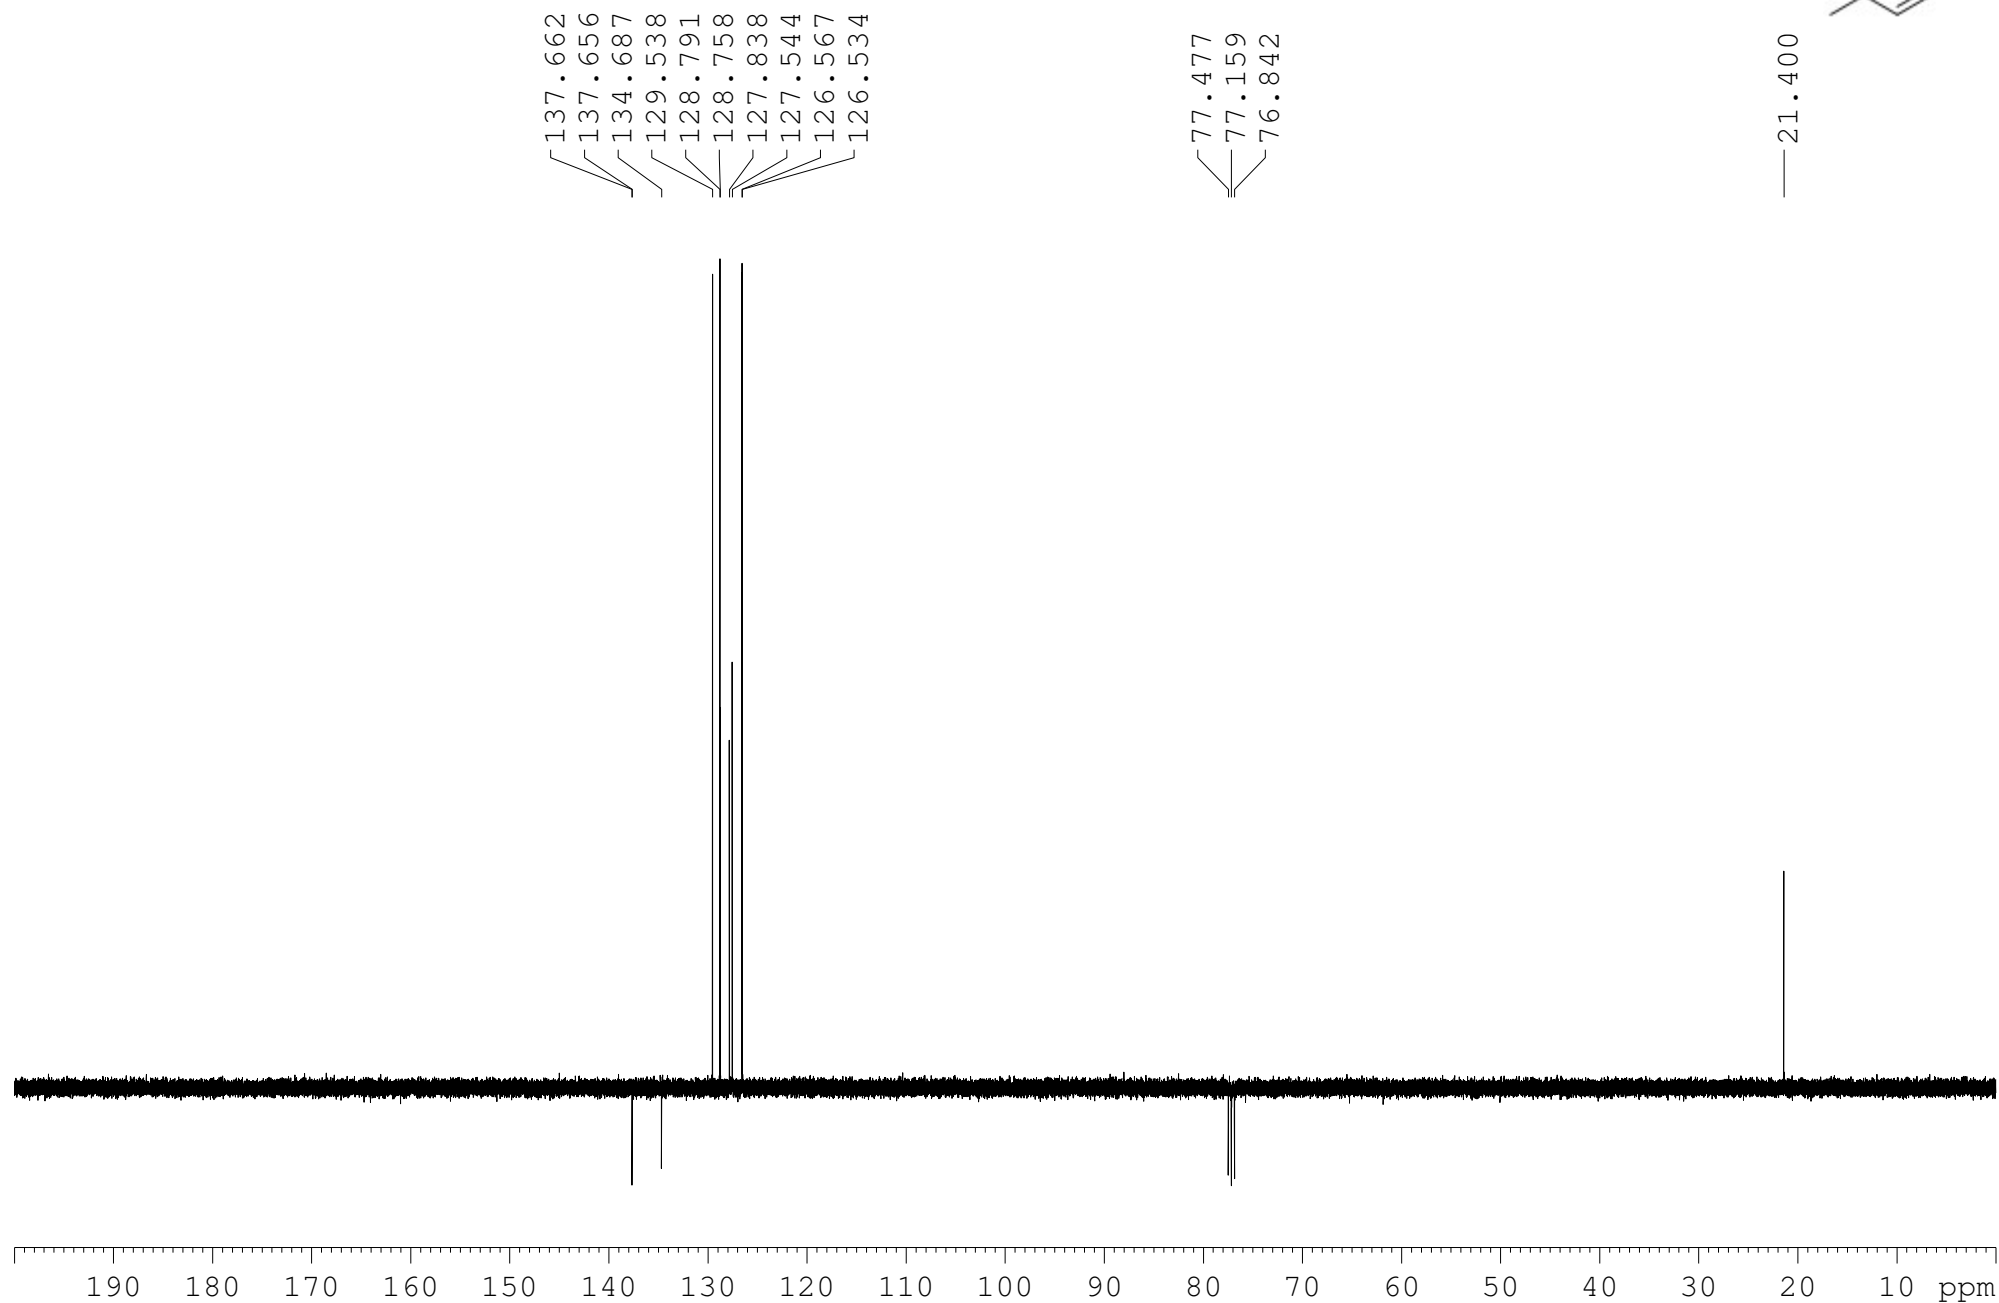

(E)-1-chloro-4-(4-methylstyryl)benzene (**10bb**)

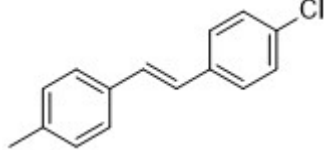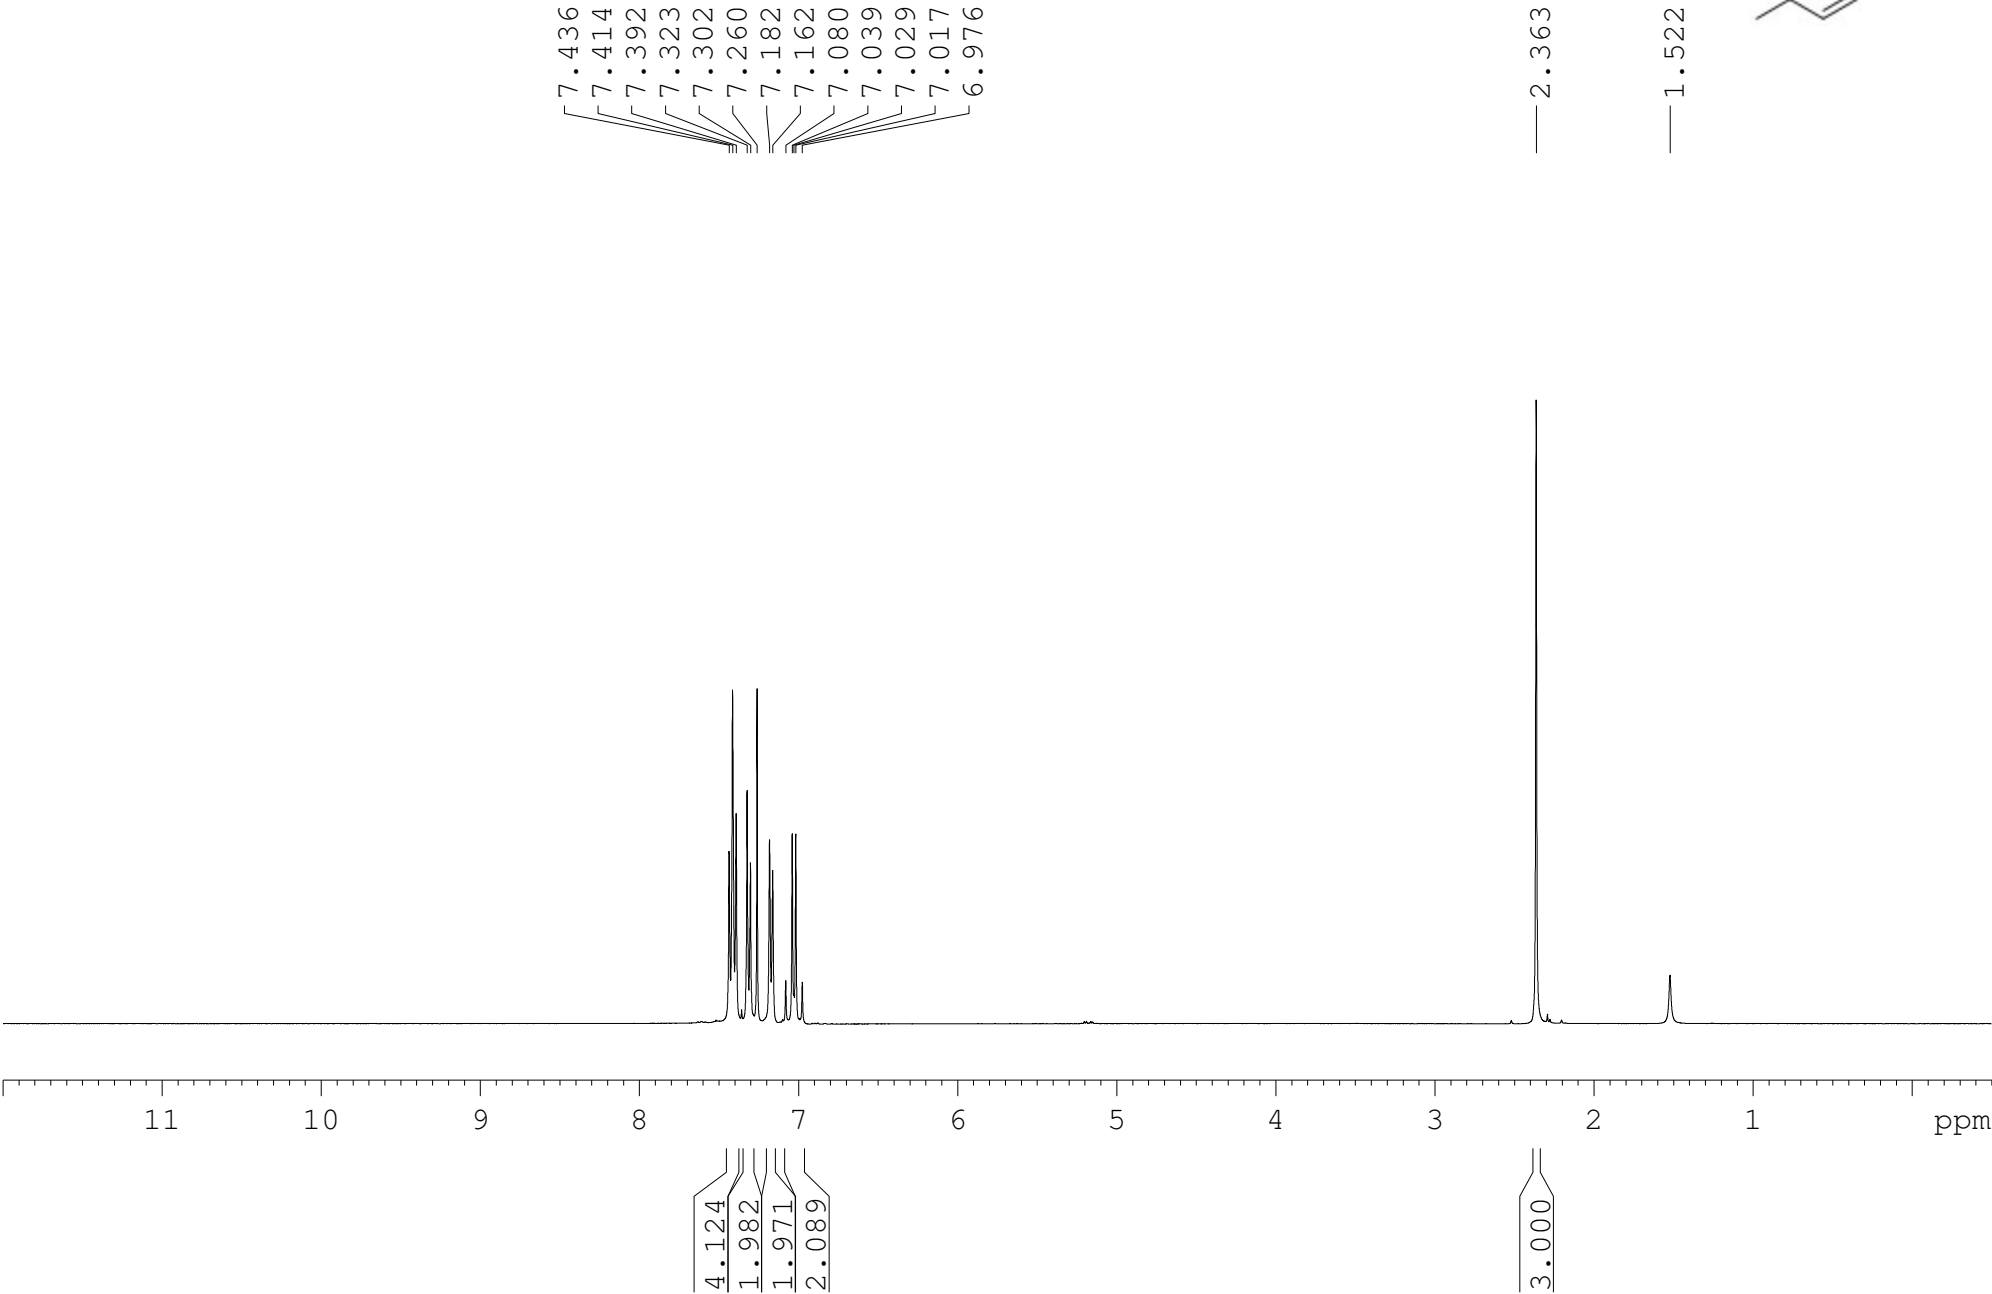



(E)-1-chloro-4-(4-methylstyryl)benzene (**10bb**)

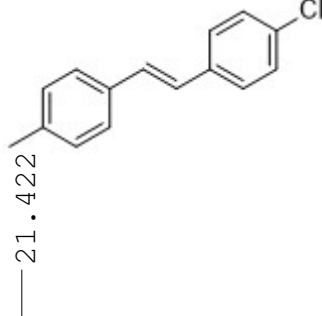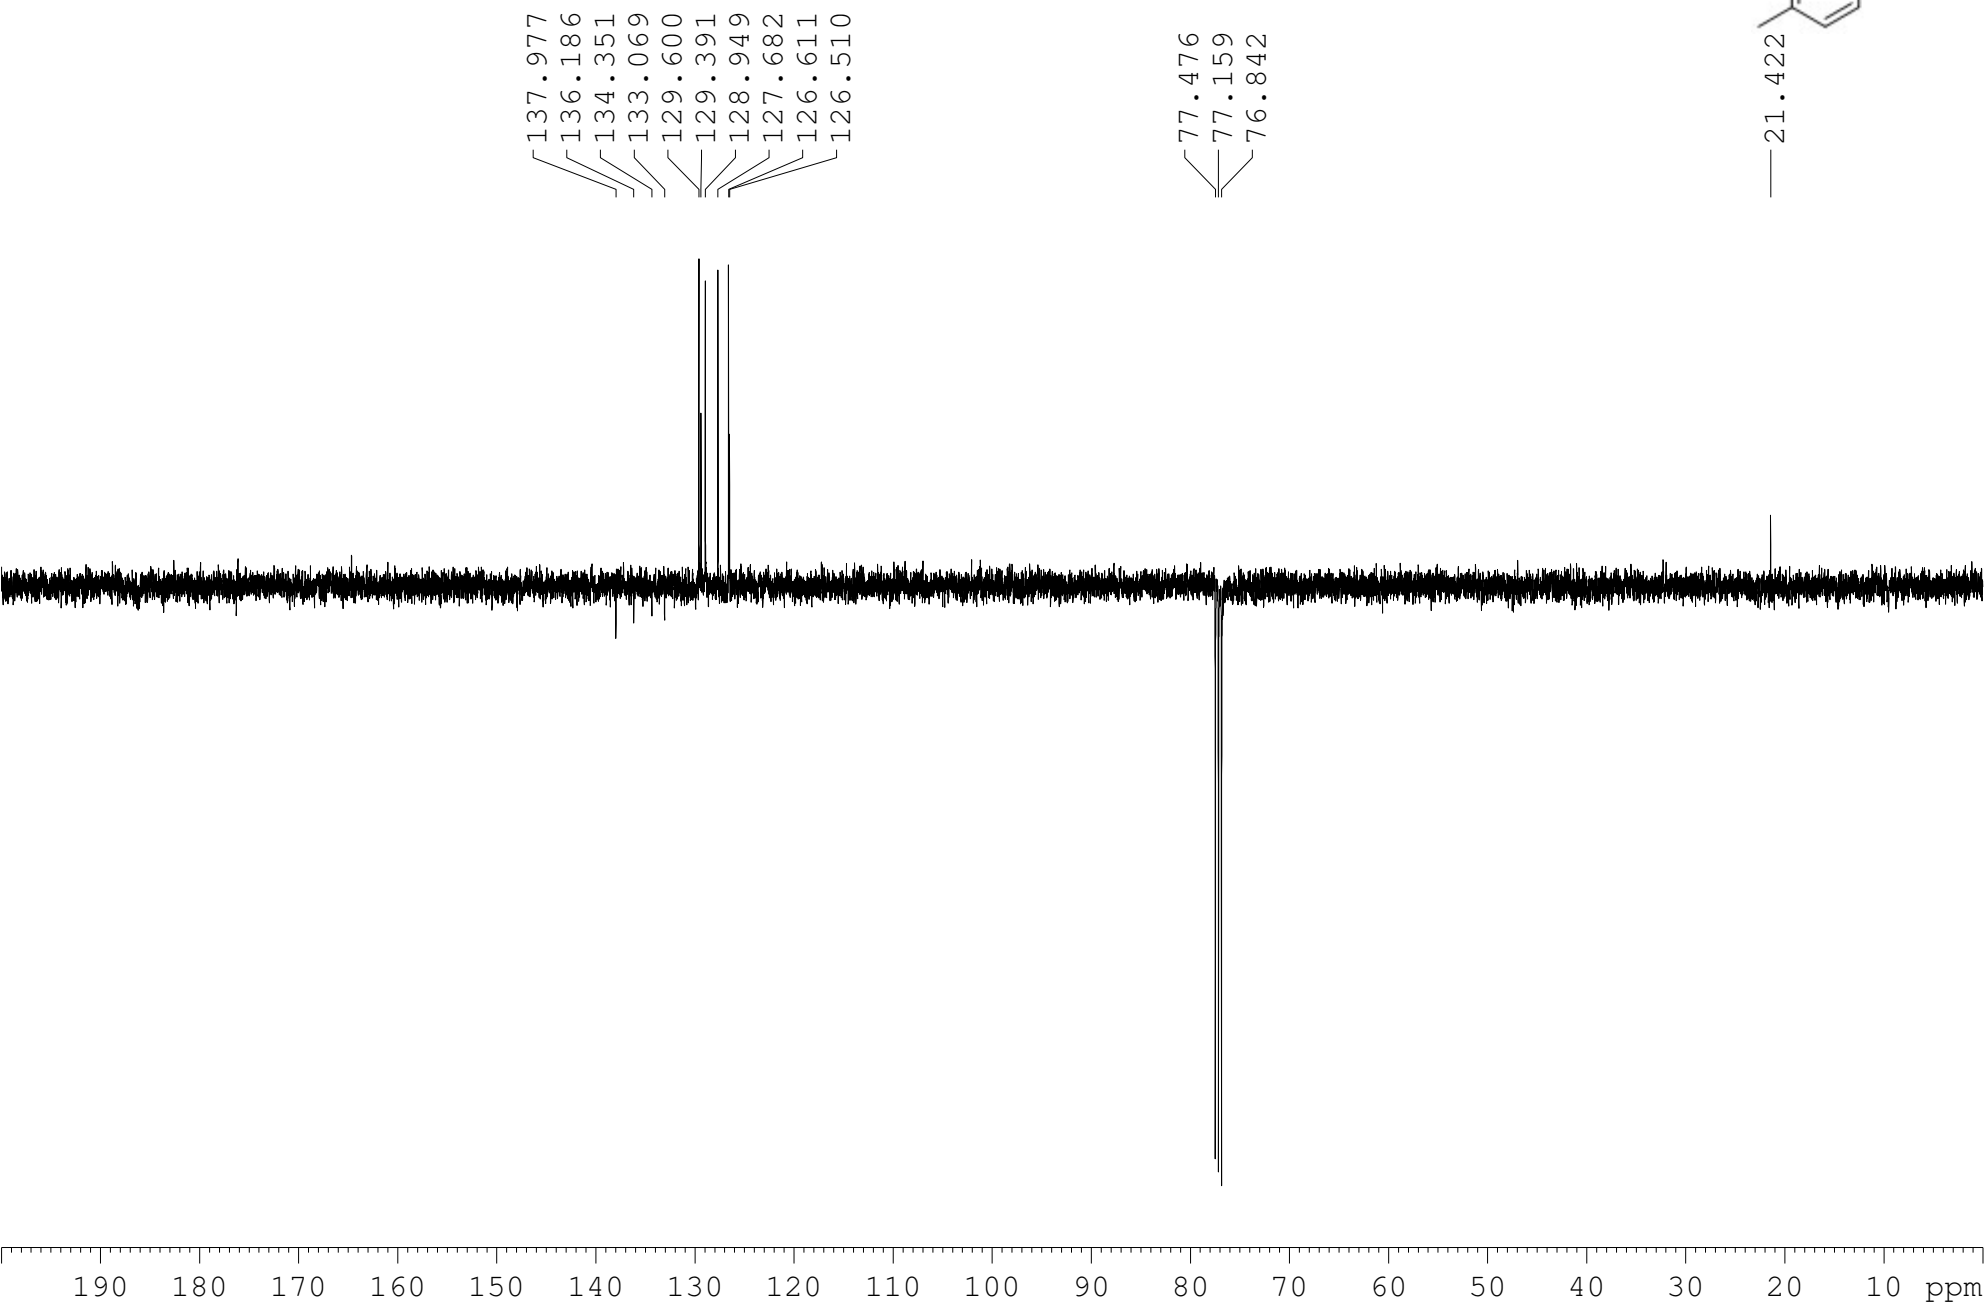

(E)-1-methoxy-4-styrylbenzene (**10ca**)

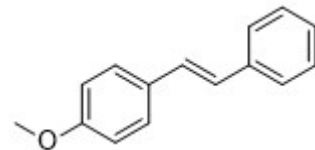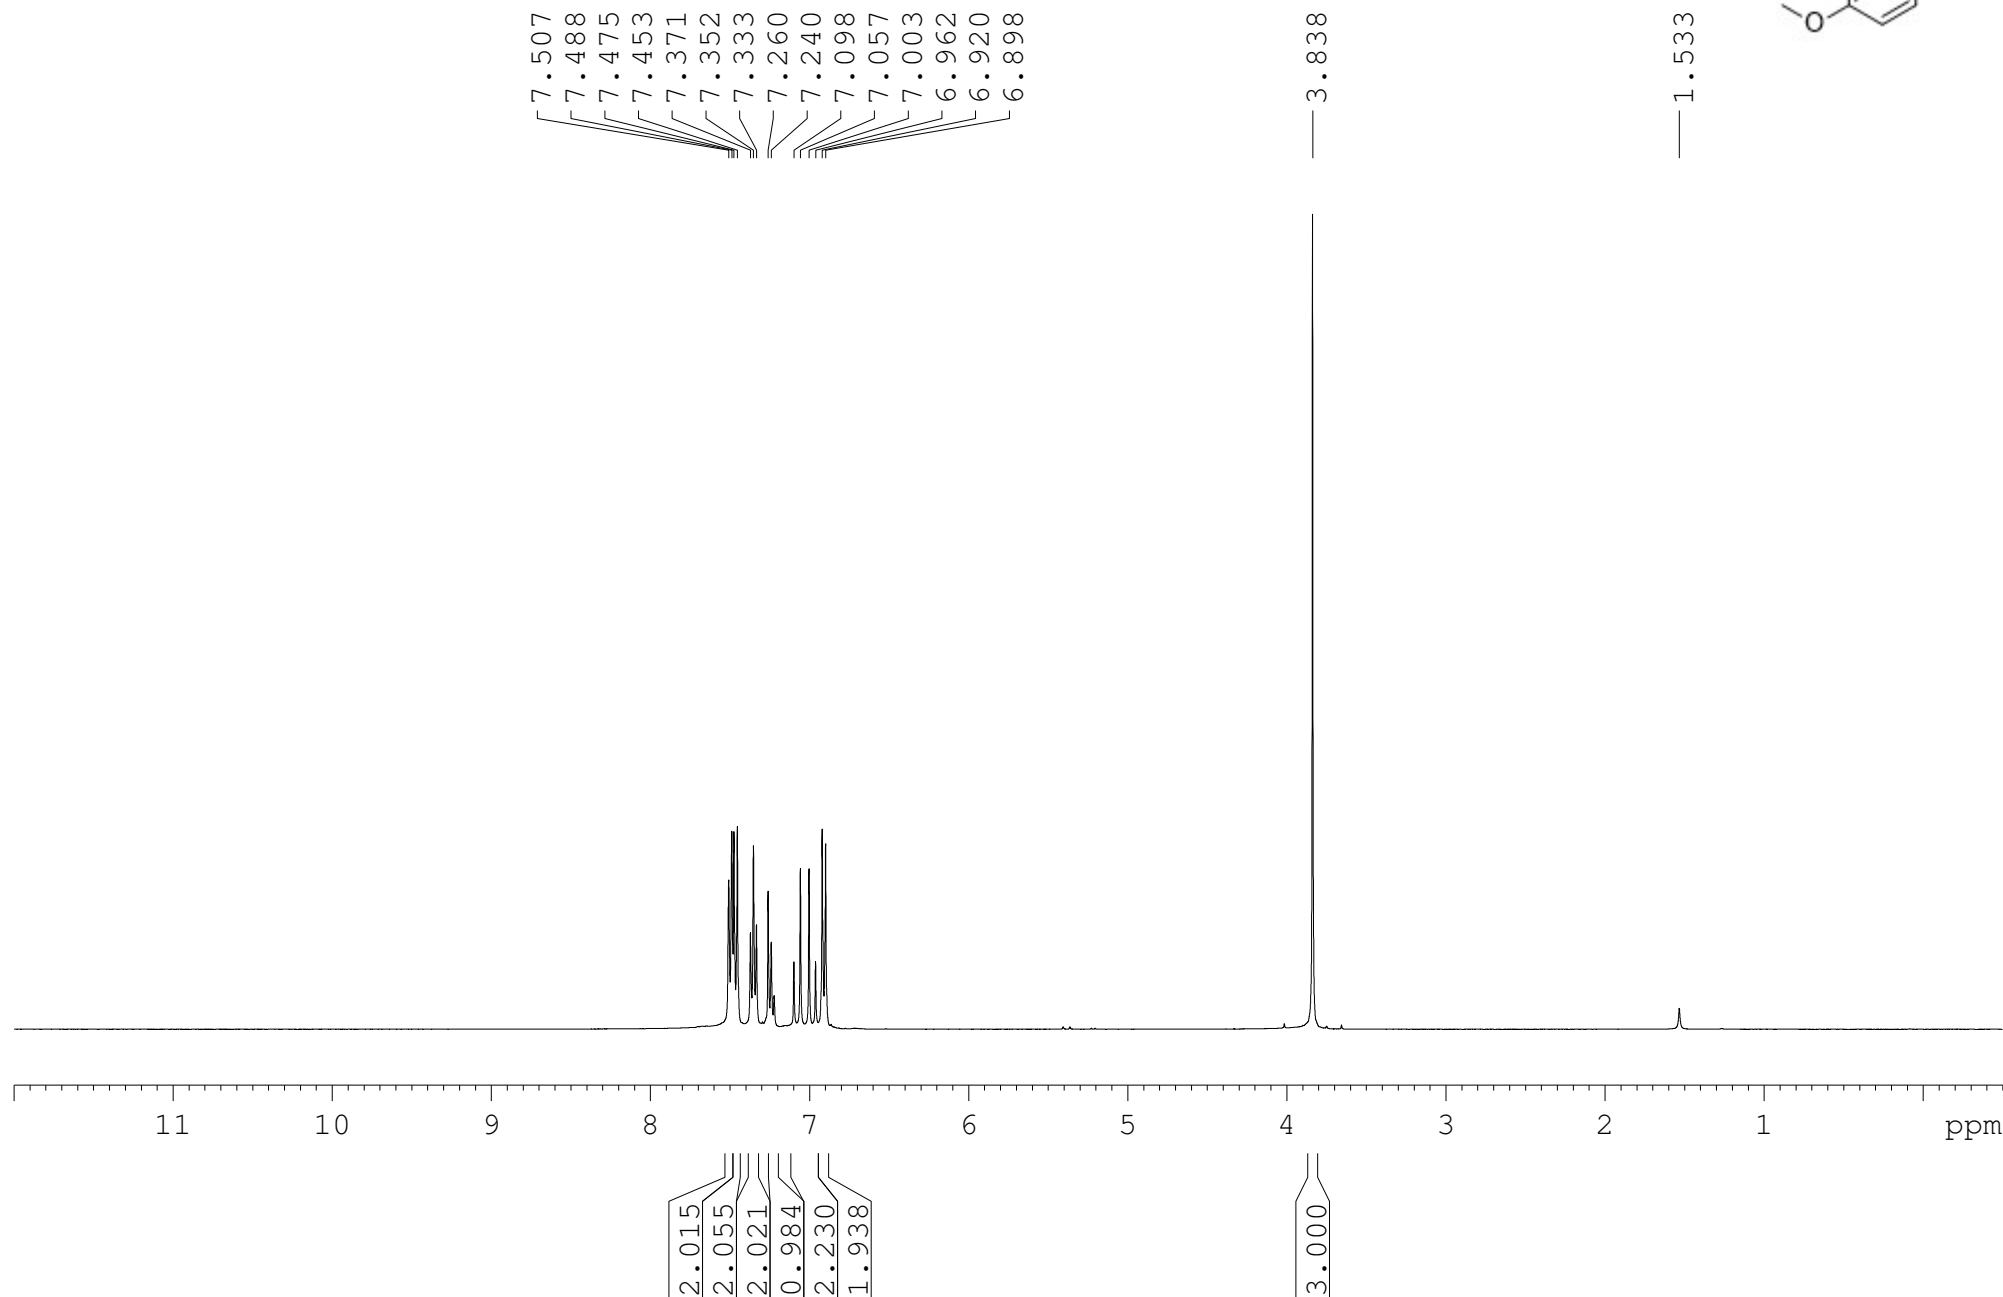

(E)-1-methoxy-4-styrylbenzene (**10ca**)

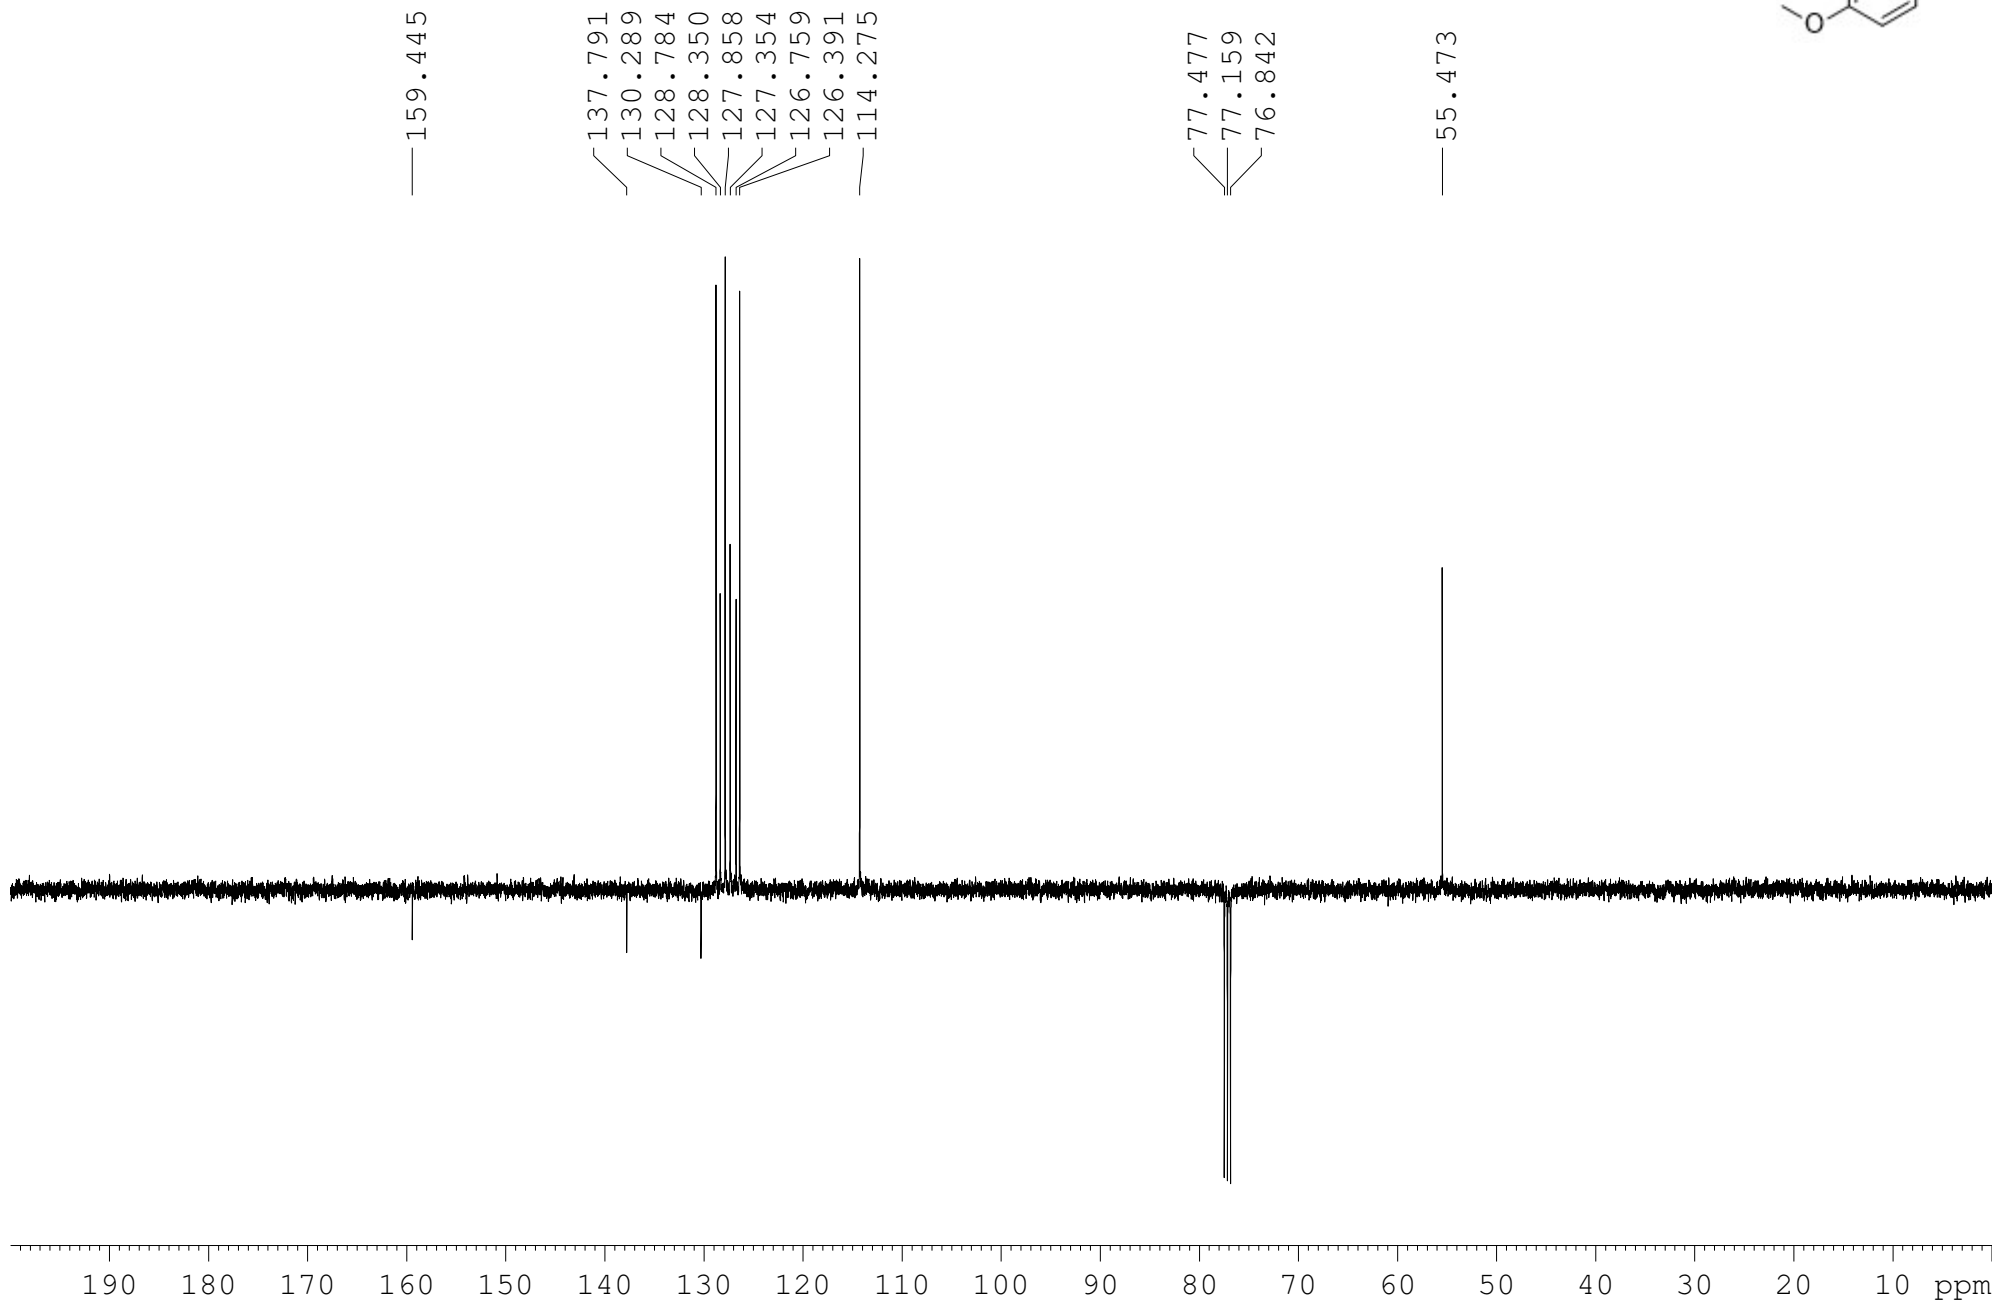

(E)-1-chloro-4-(4-methoxystyryl)benzene (**10cb**)

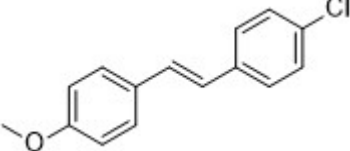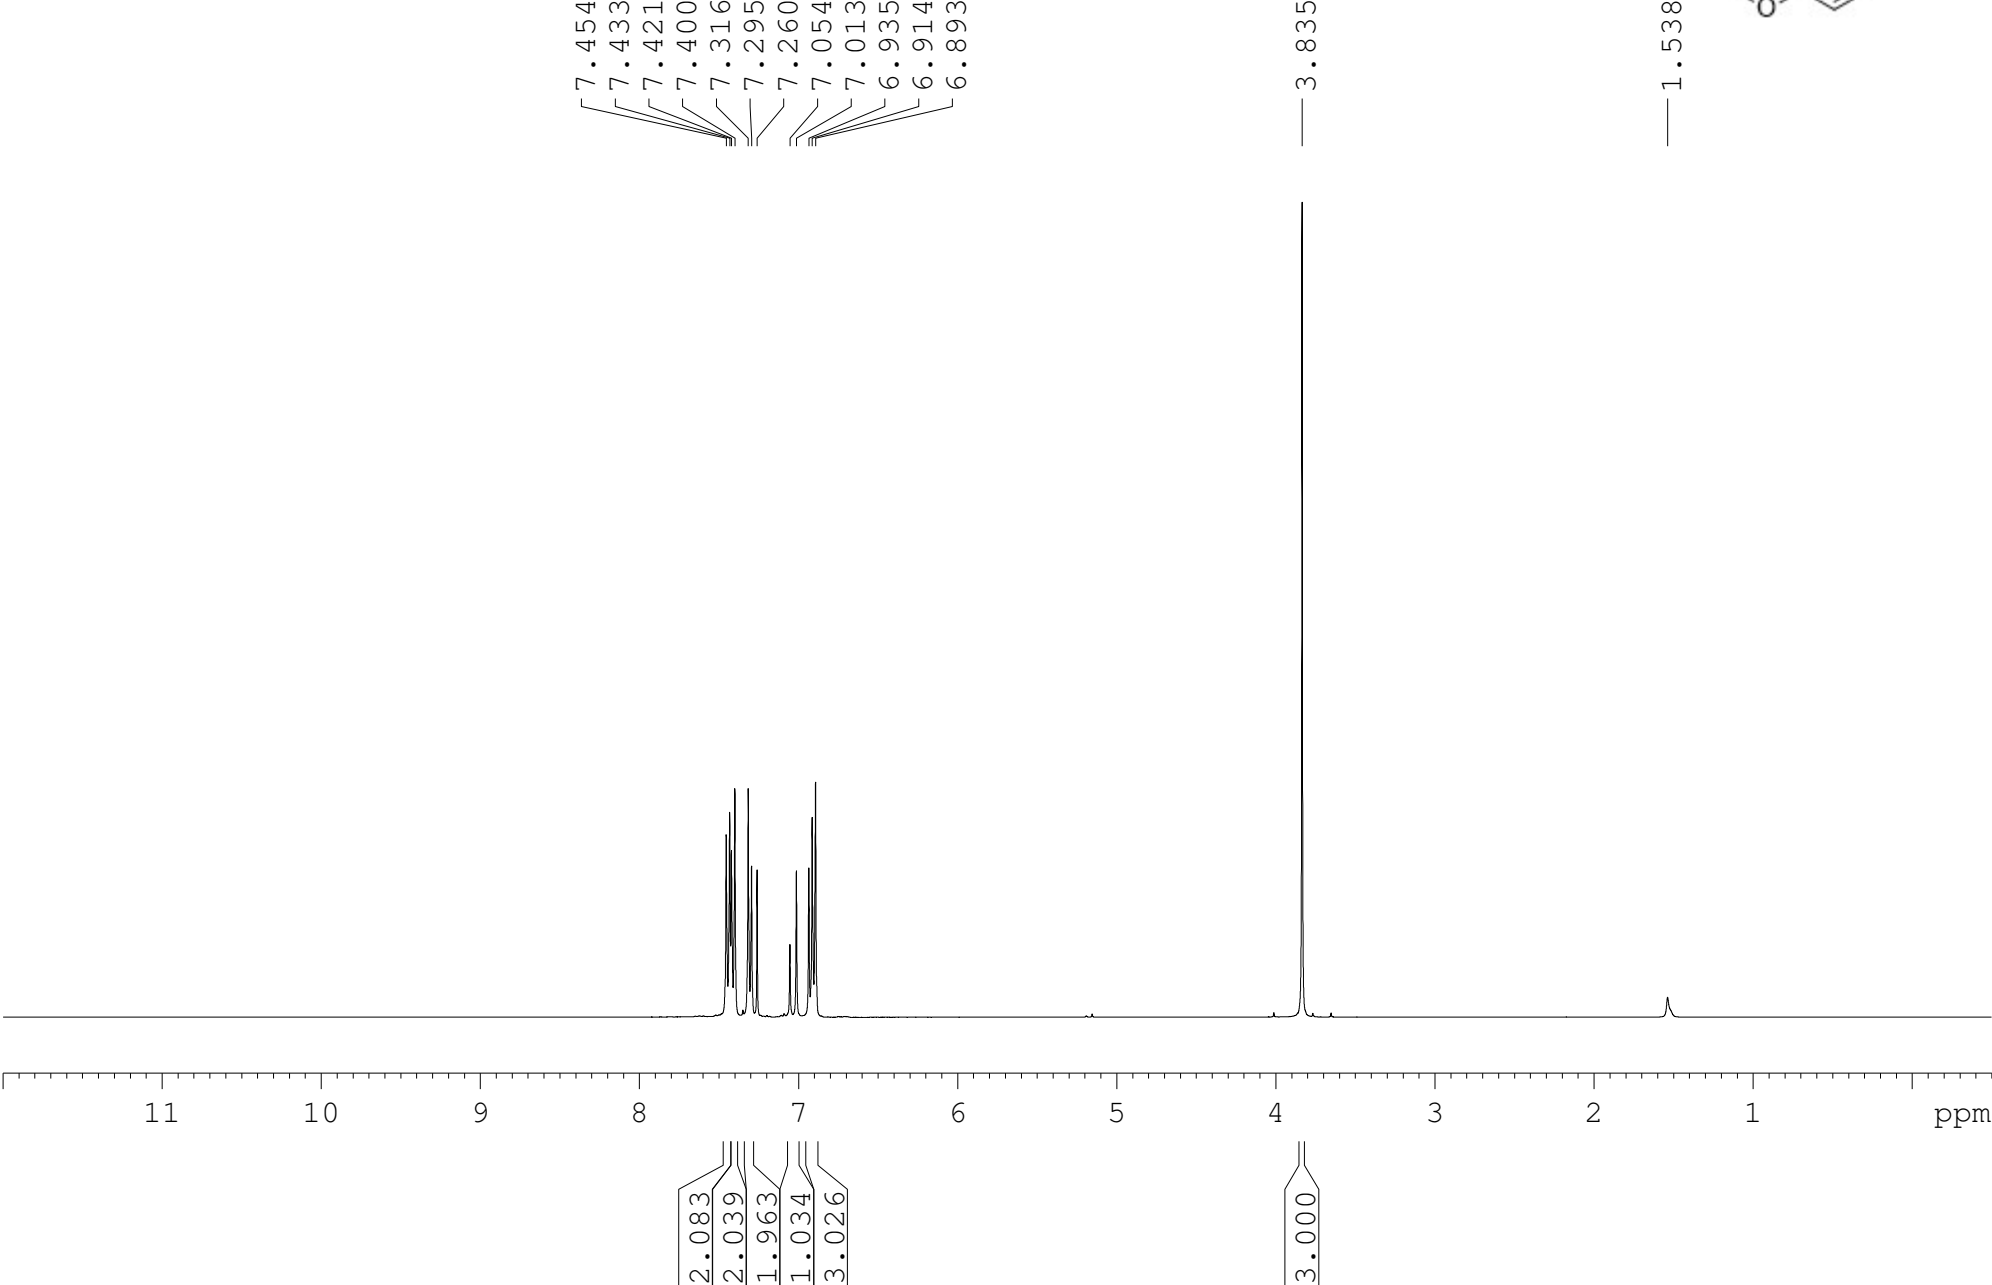

(E)-1-chloro-4-(4-methoxystyryl)benzene (**10cb**)

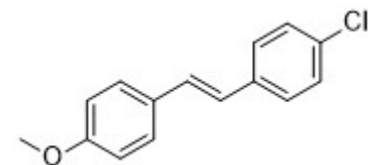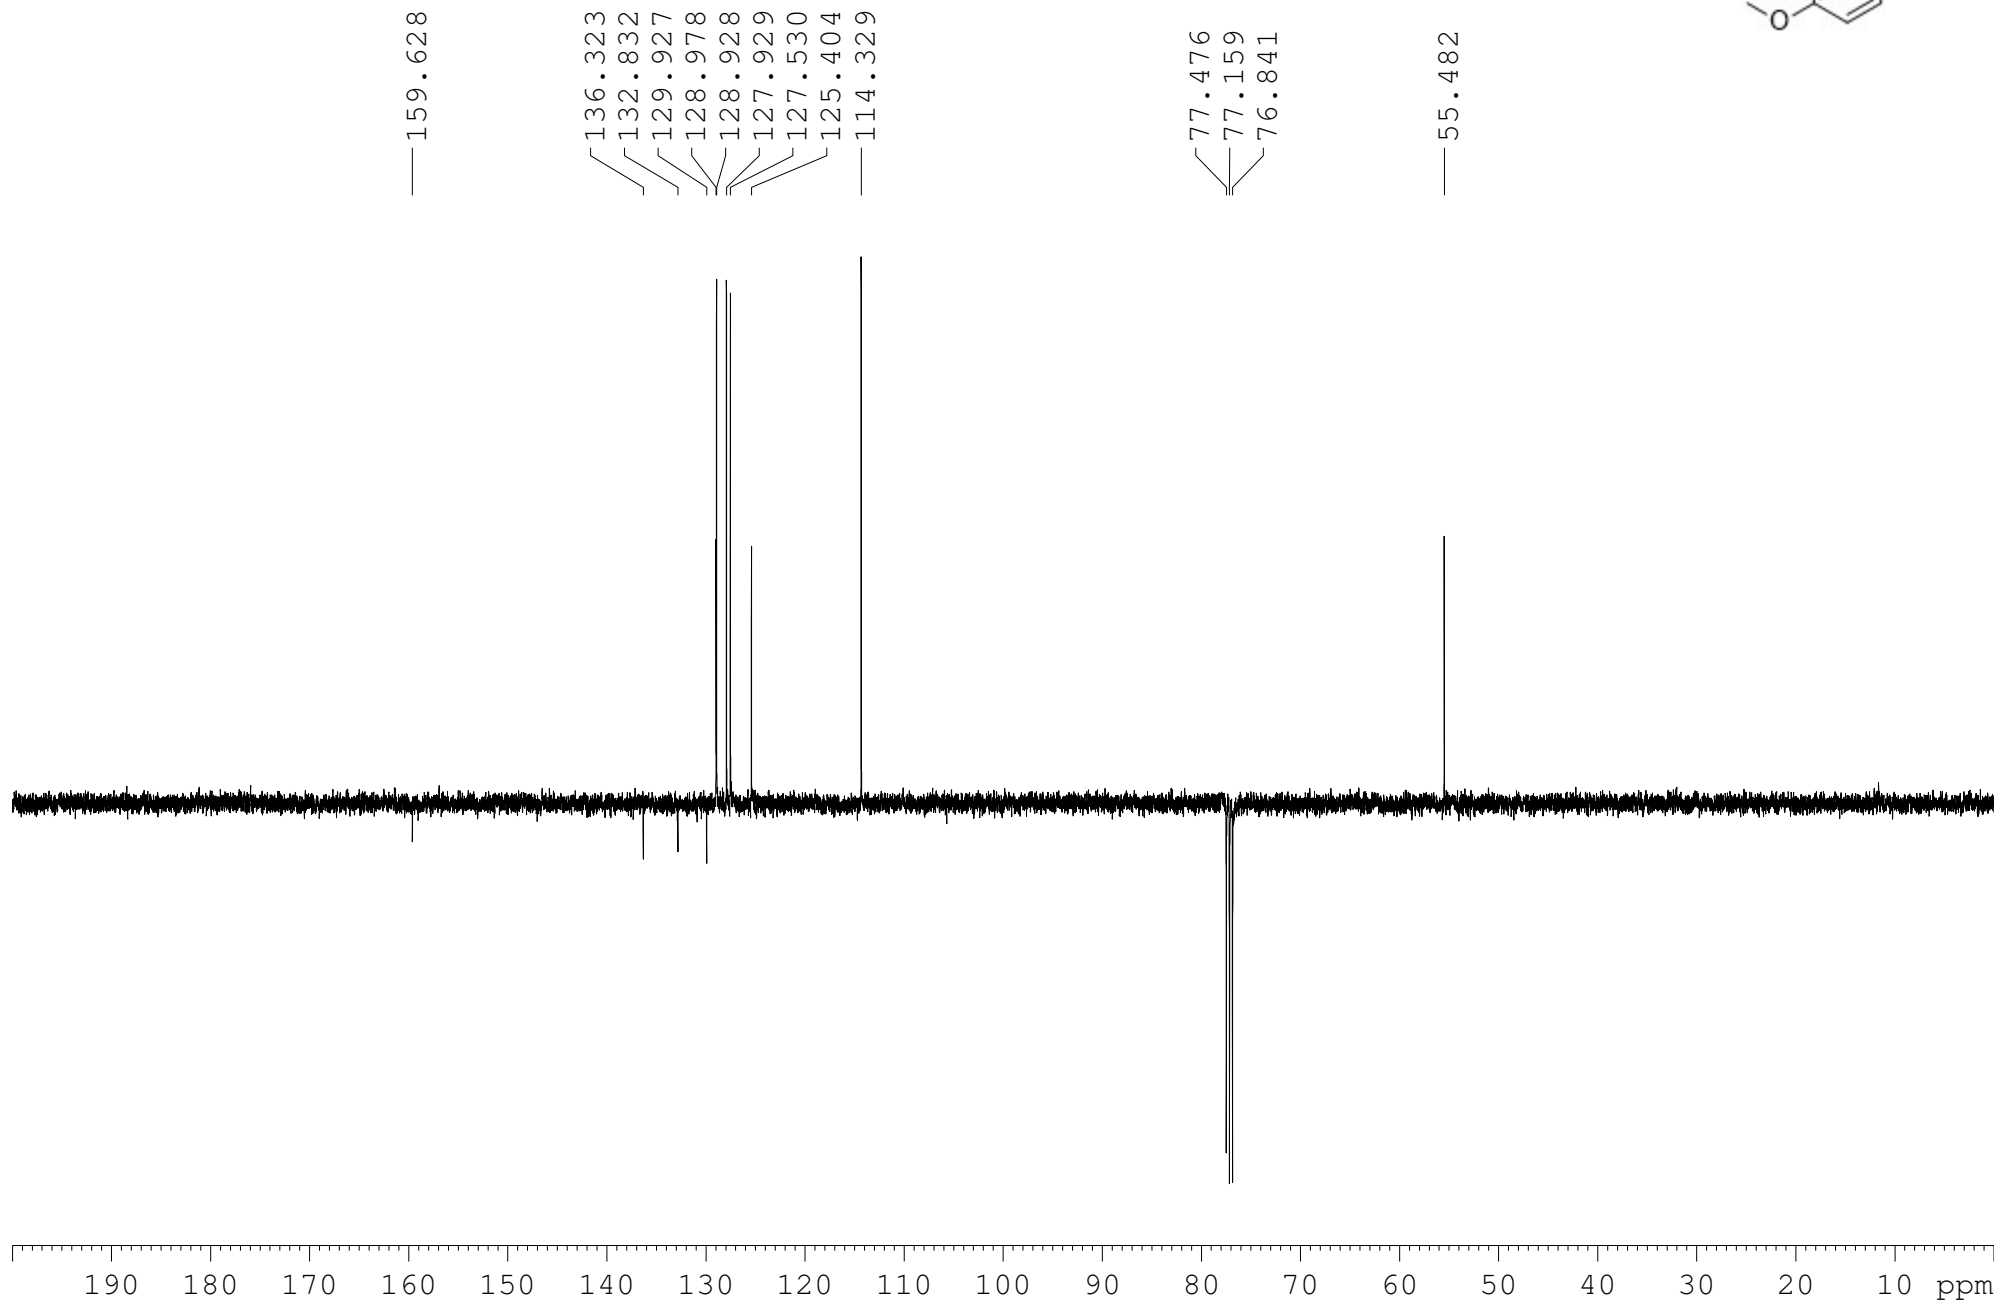

(E)-1-(4-styrylphenyl)ethan-1-one (**10da**)

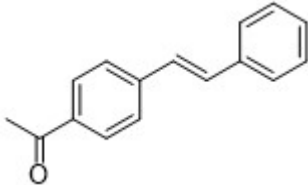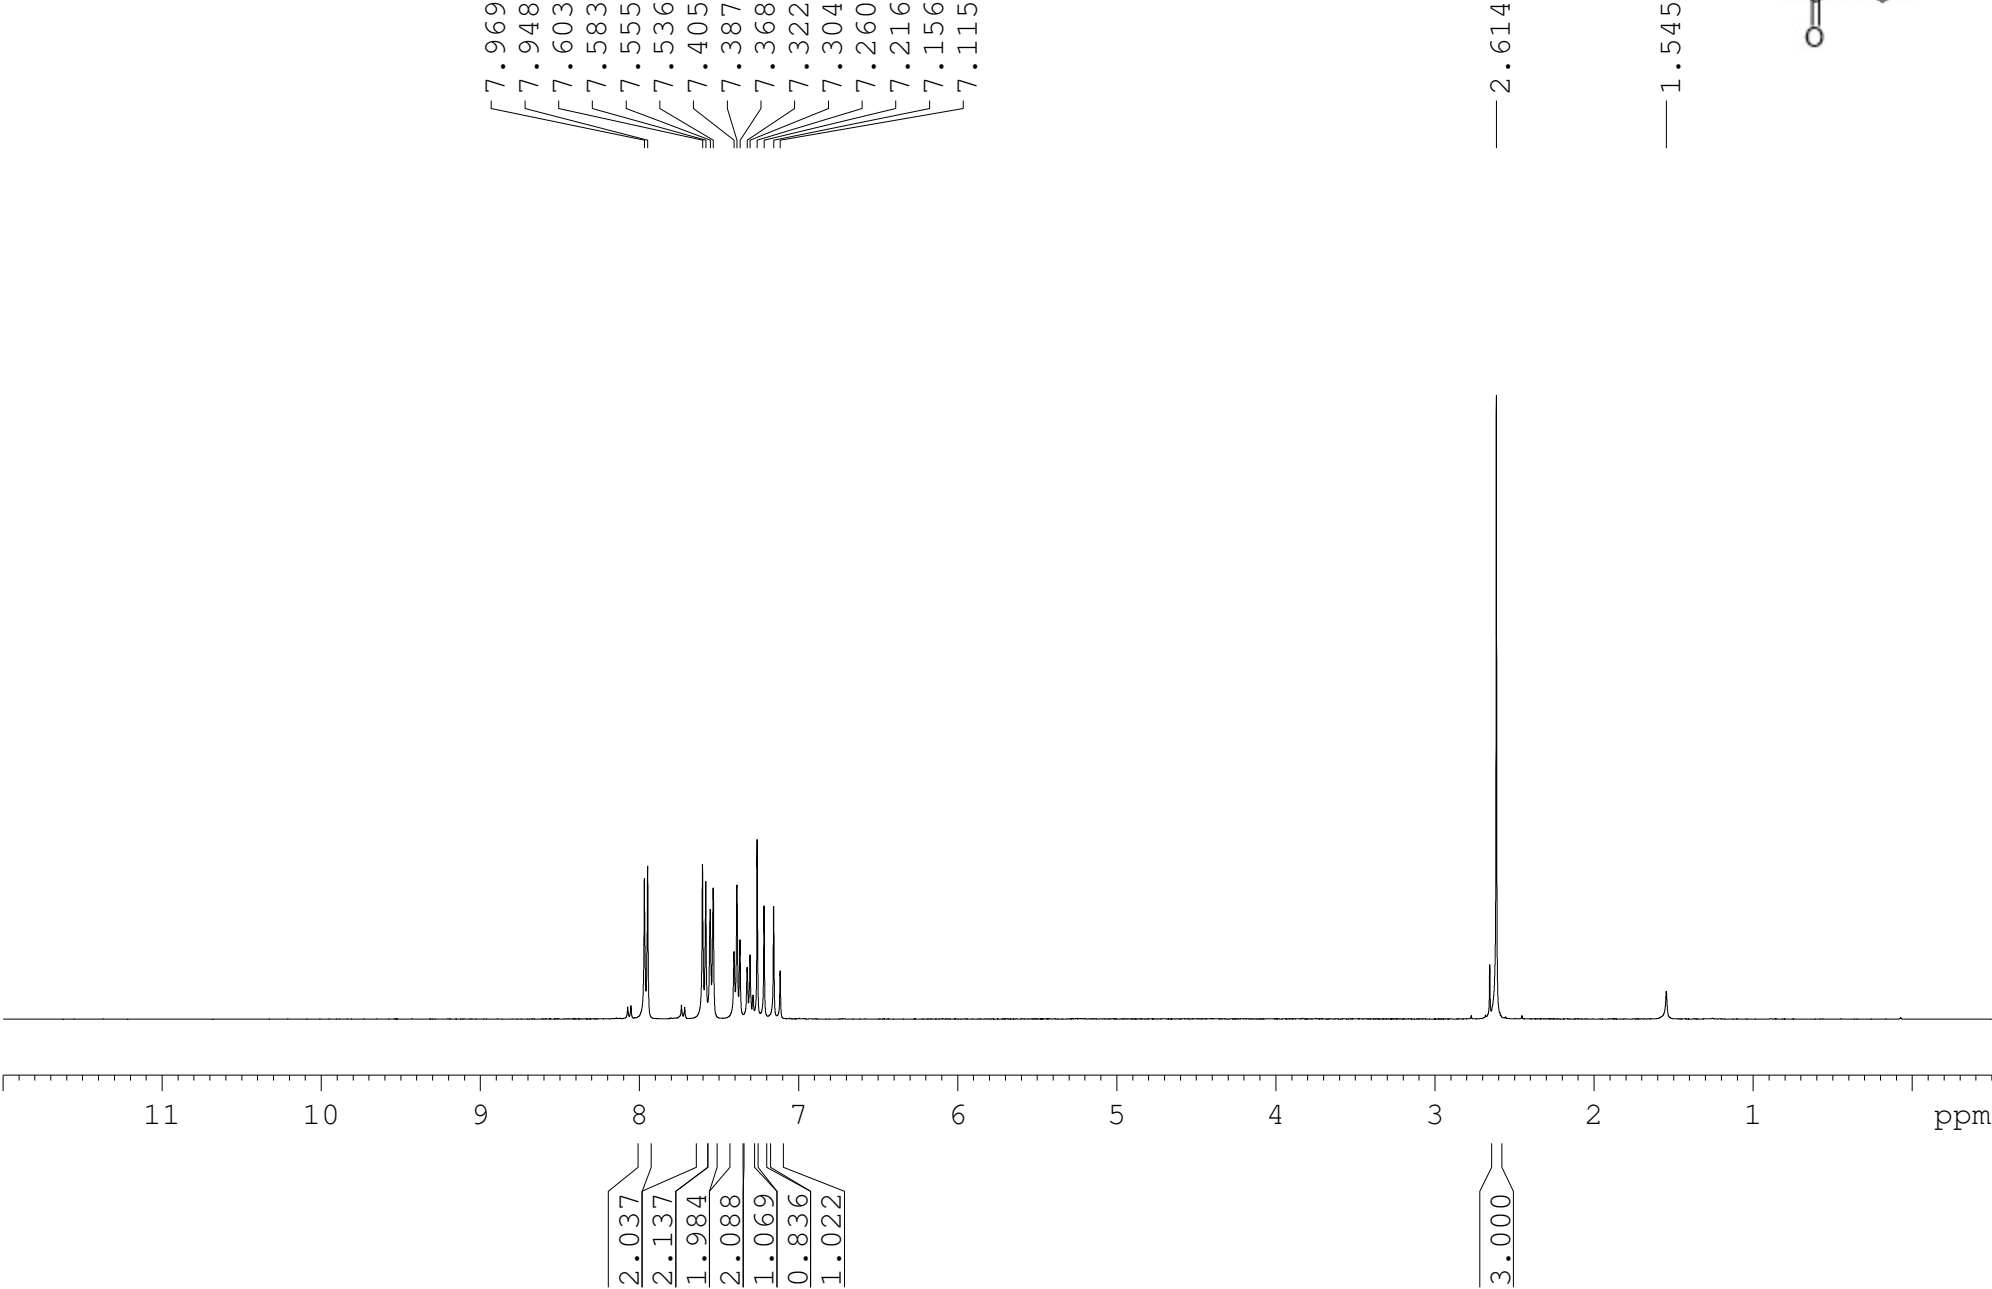

(E)-1-(4-styrylphenyl)ethan-1-one (**10da**)

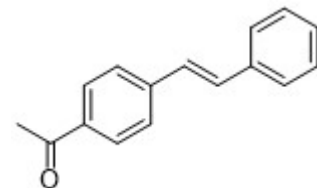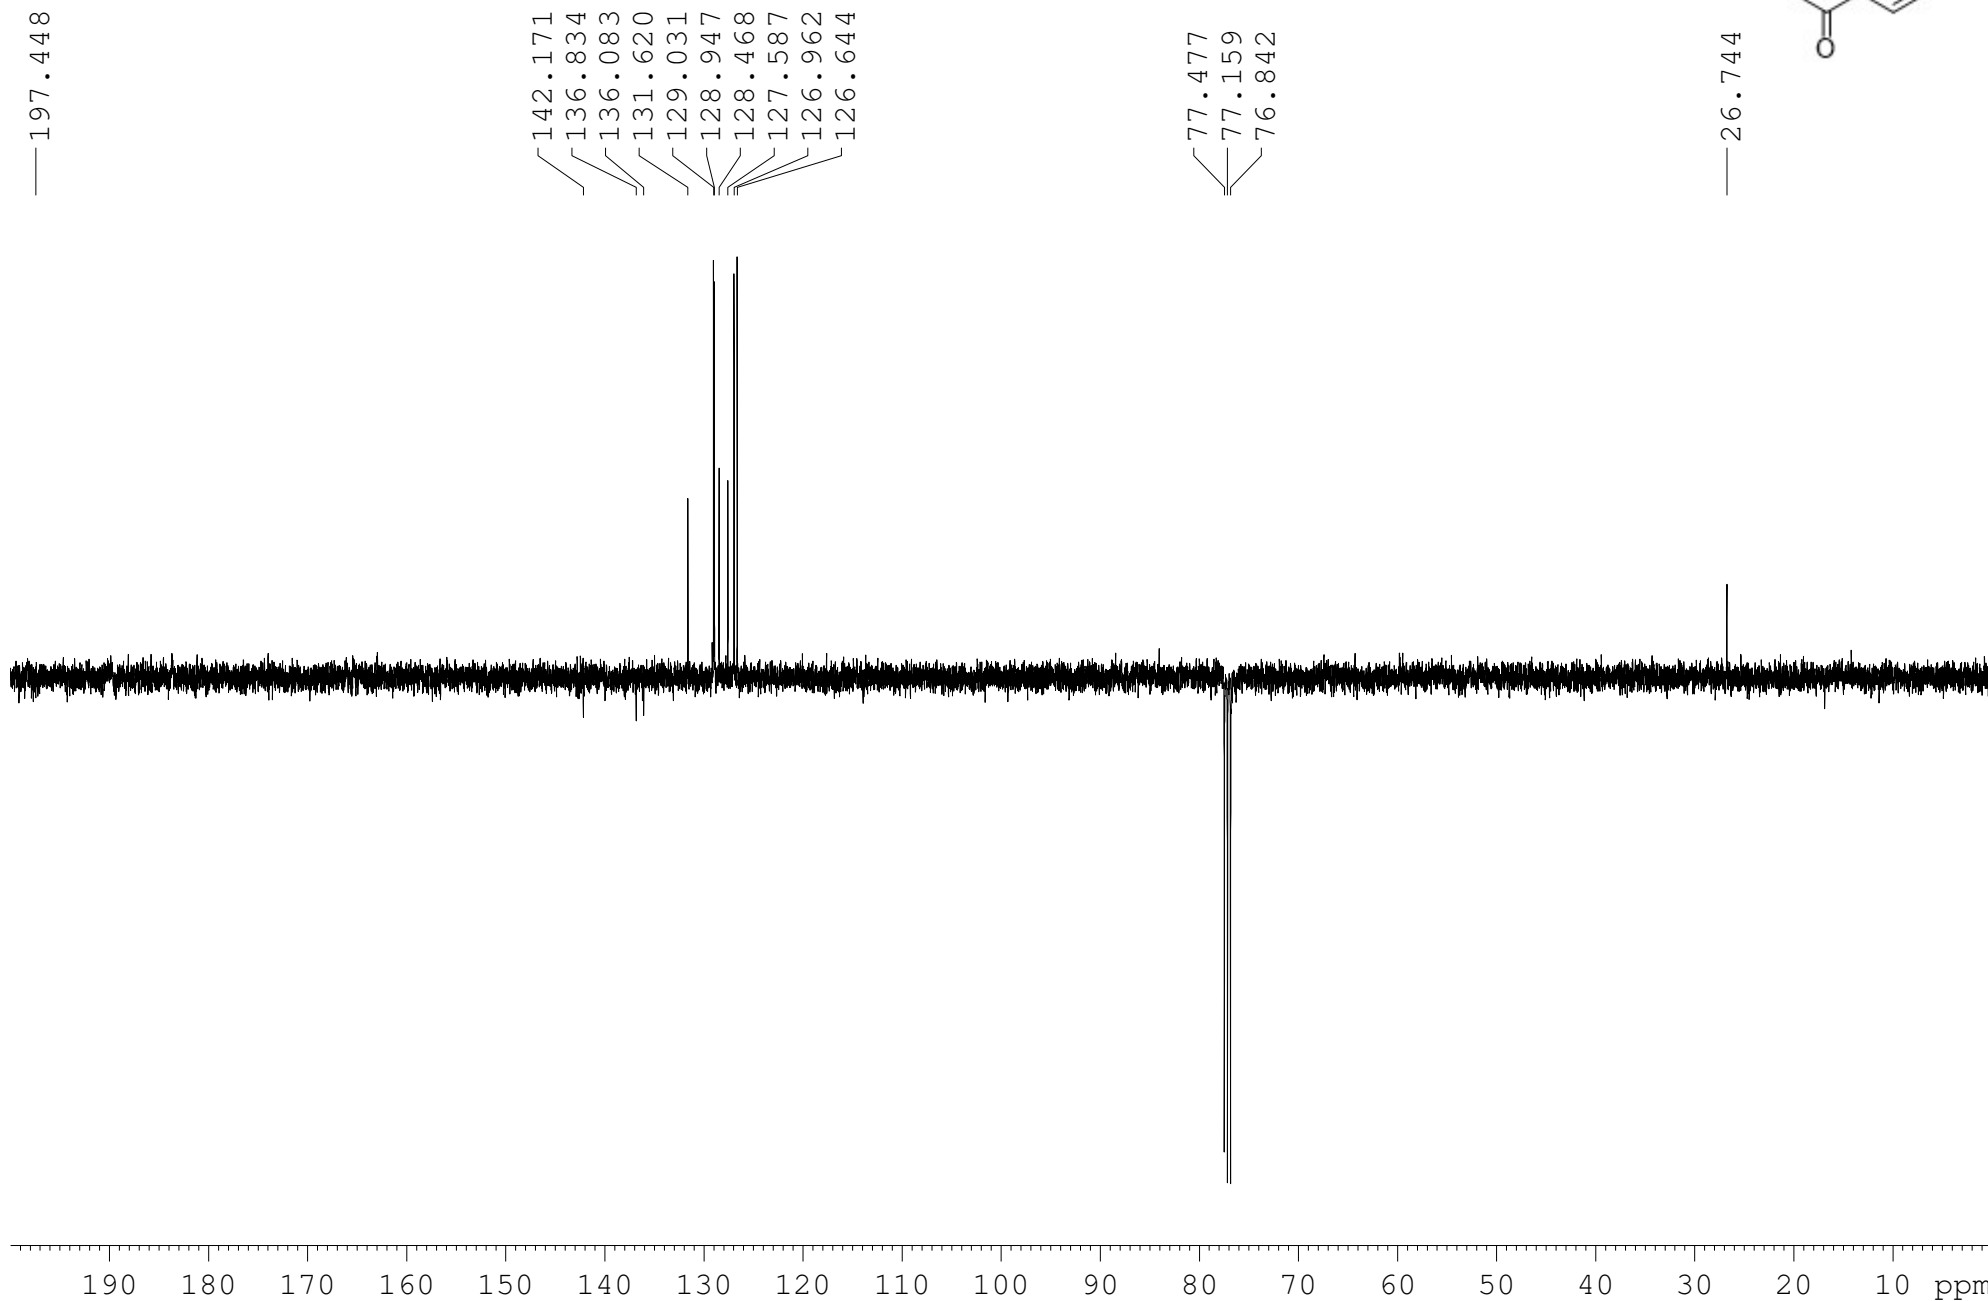

(E)-1-(4-(4-chlorostyryl)phenyl)ethan-1-one (**10db**)

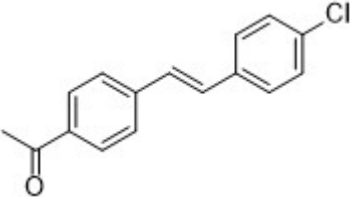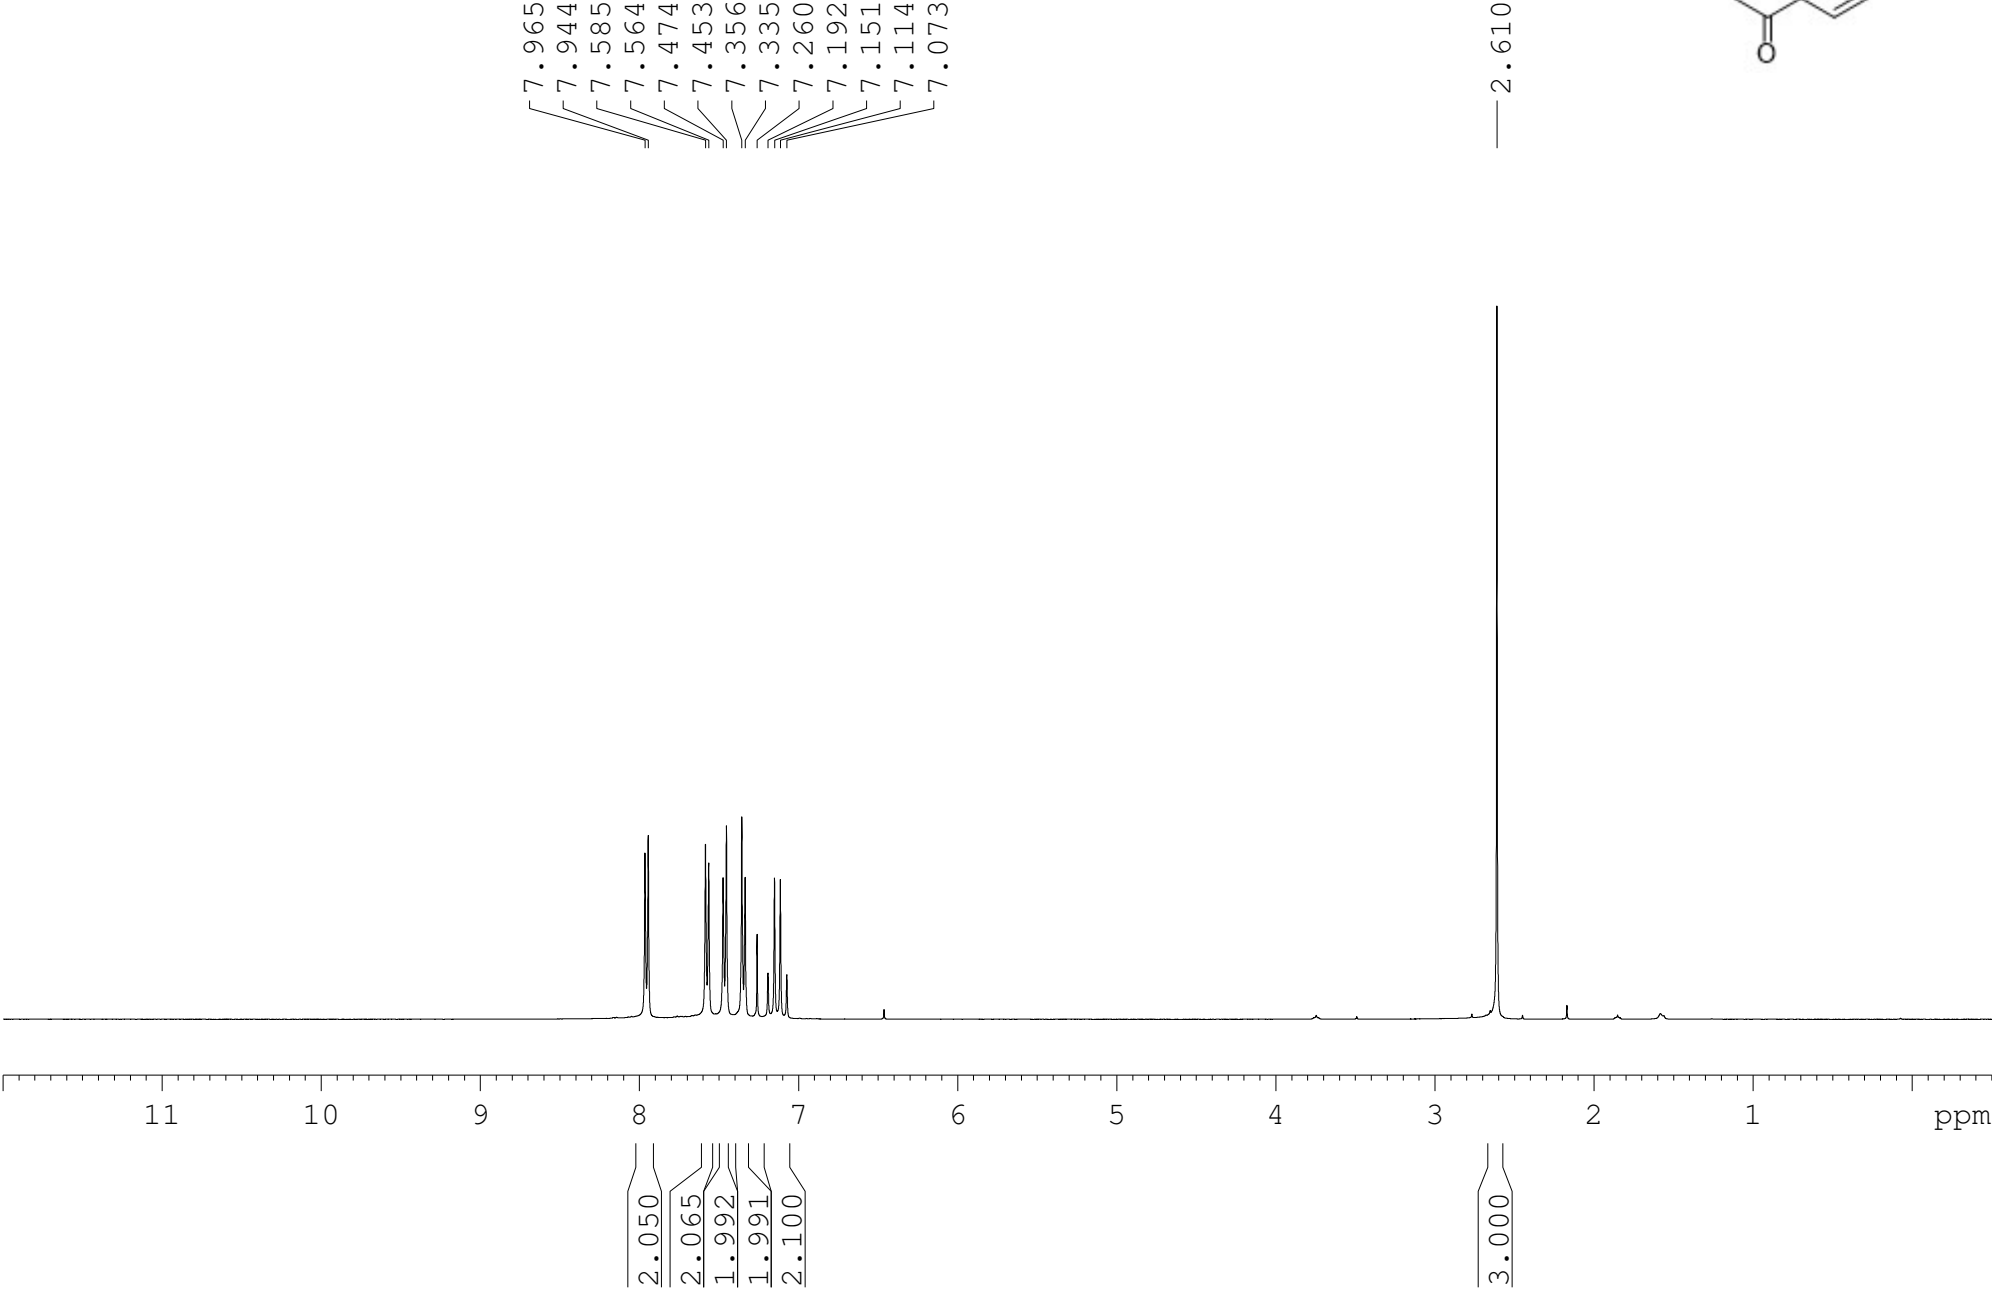



(E)-1-(4-(4-chlorostyryl)phenyl)ethan-1-one (**10db**)

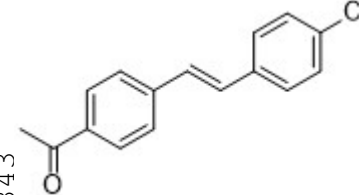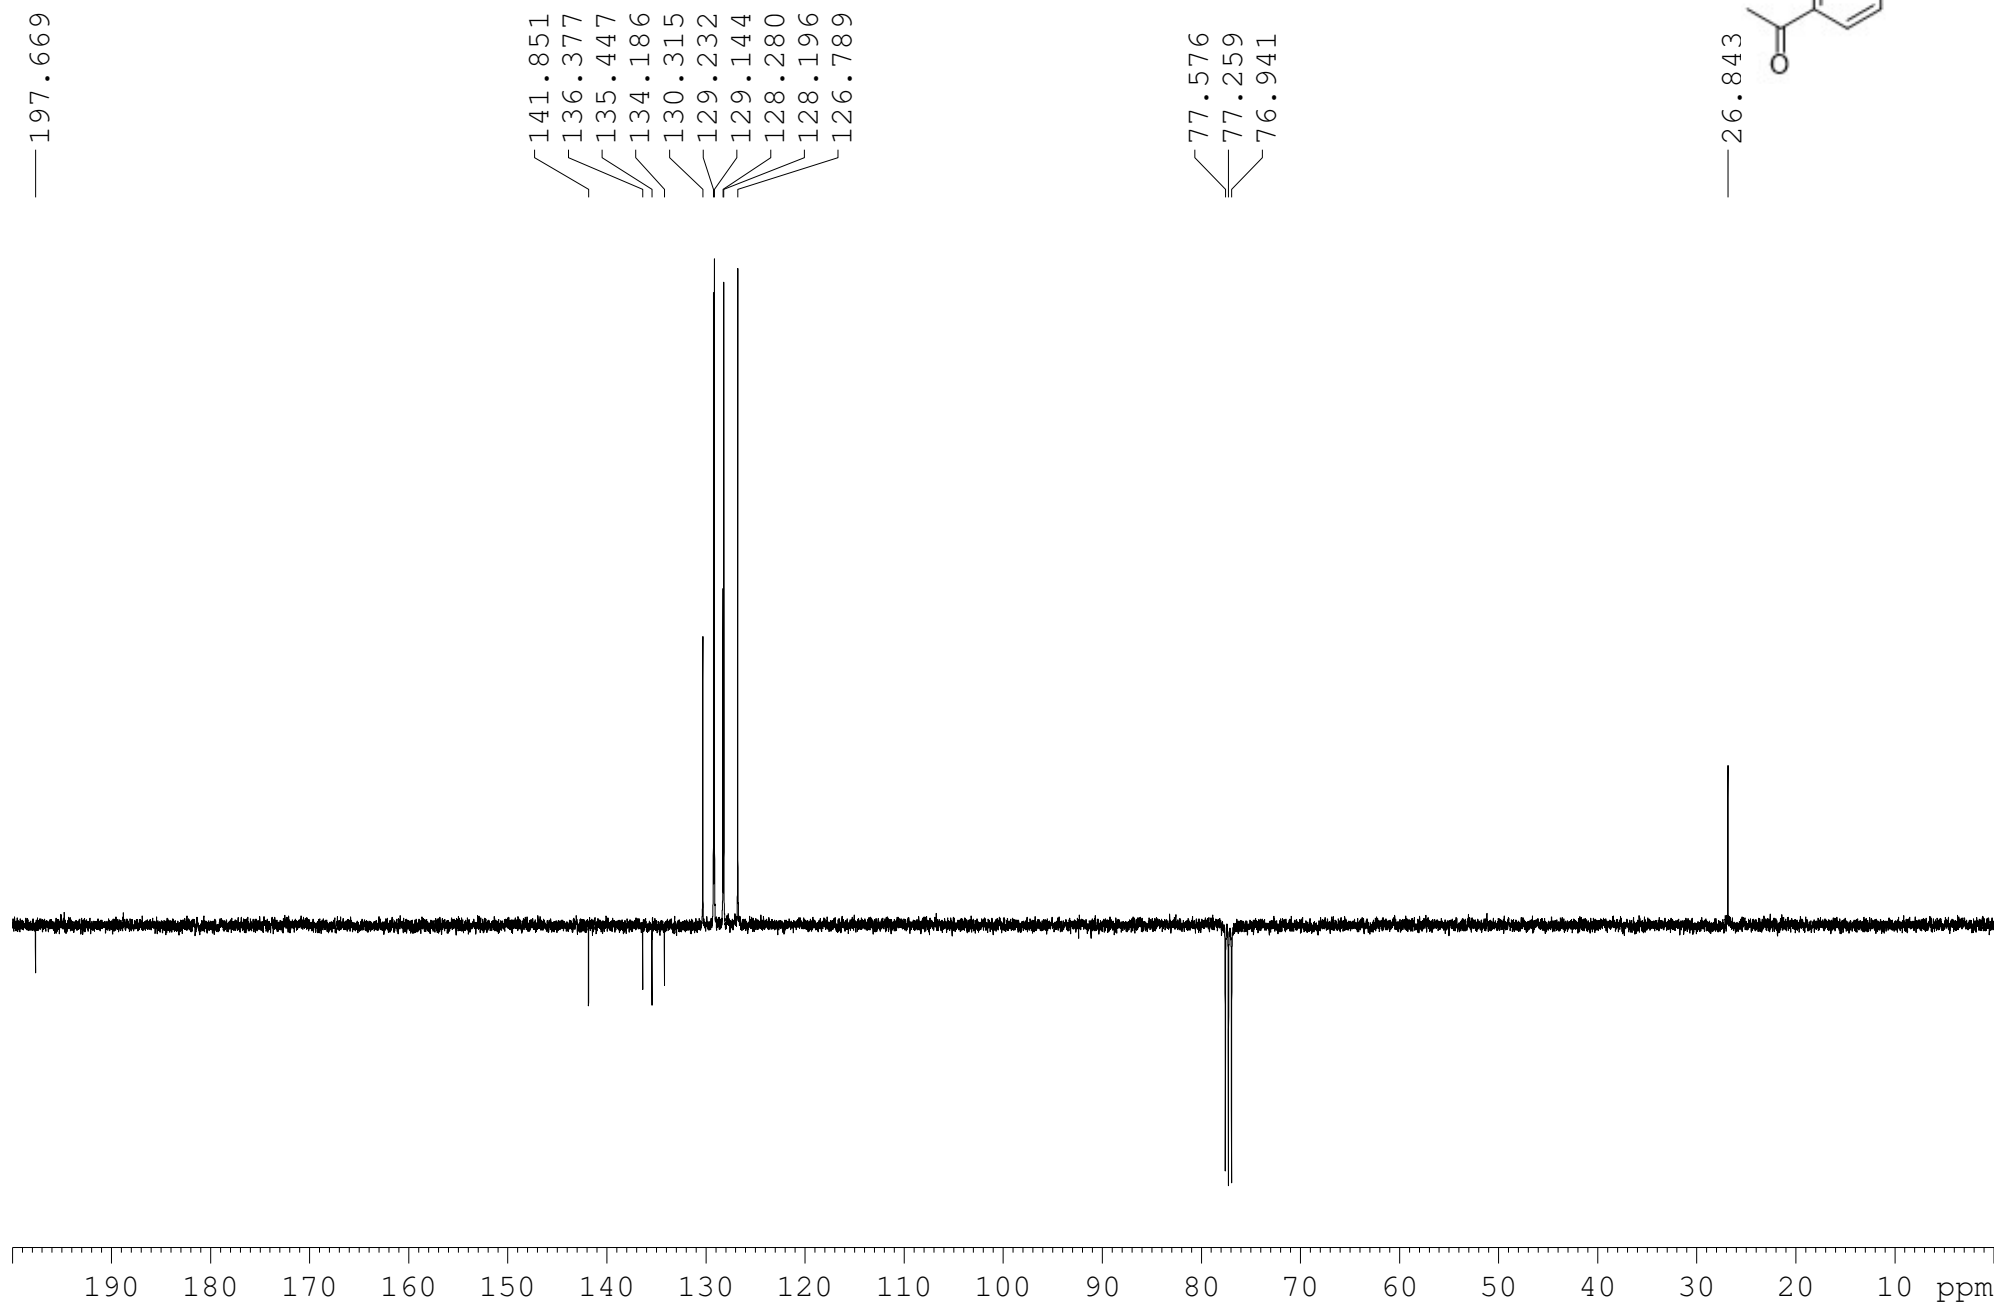

(E)-2-(2-phenylethenyl)thiophene (**10ea**)

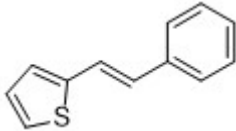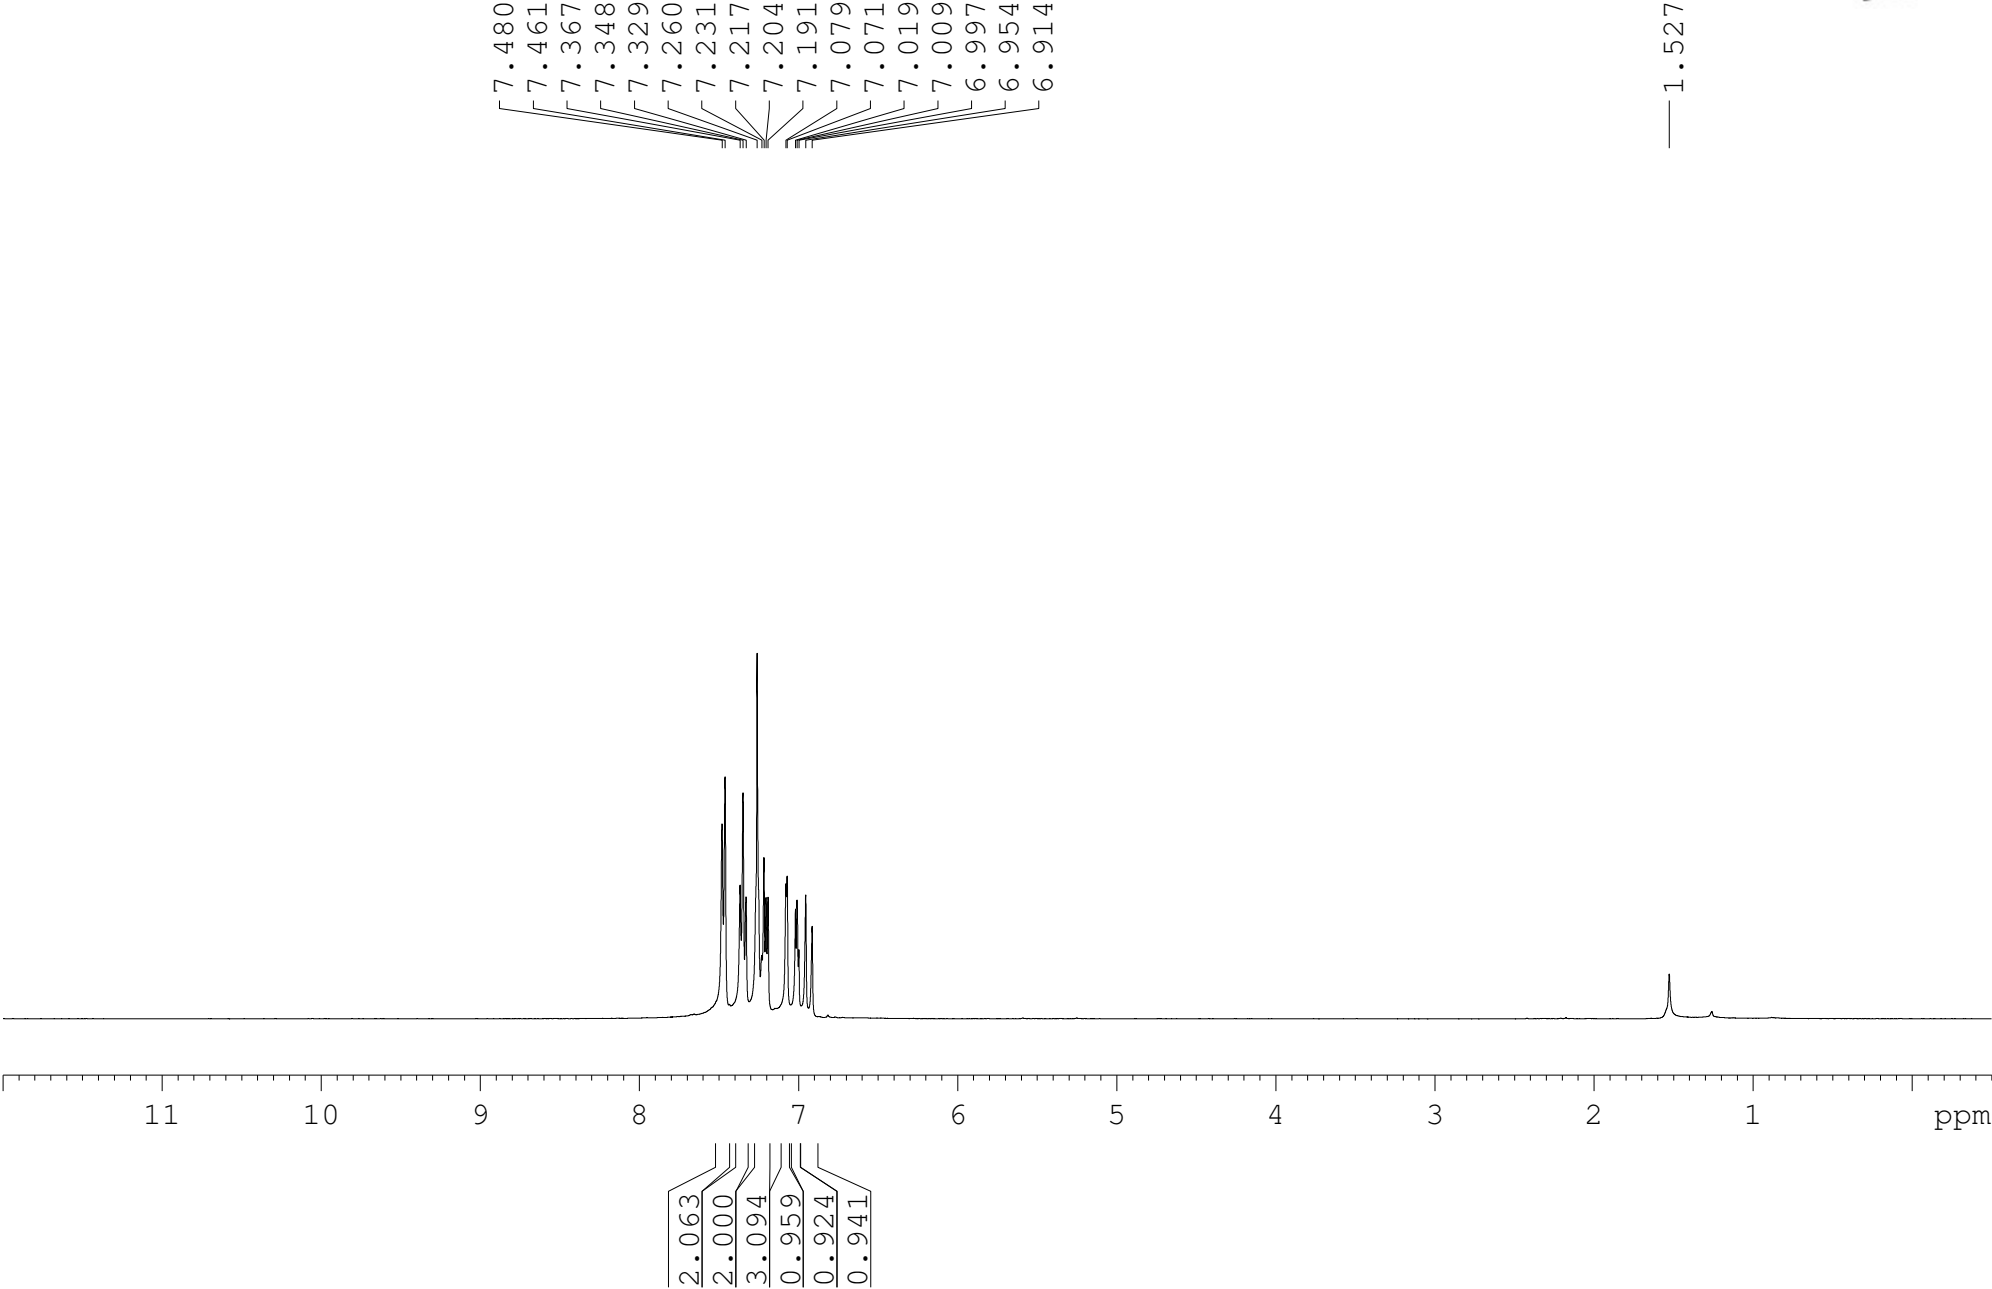

(E)-2-(2-phenylethenyl)thiophene (**10ea**)

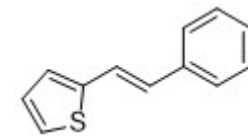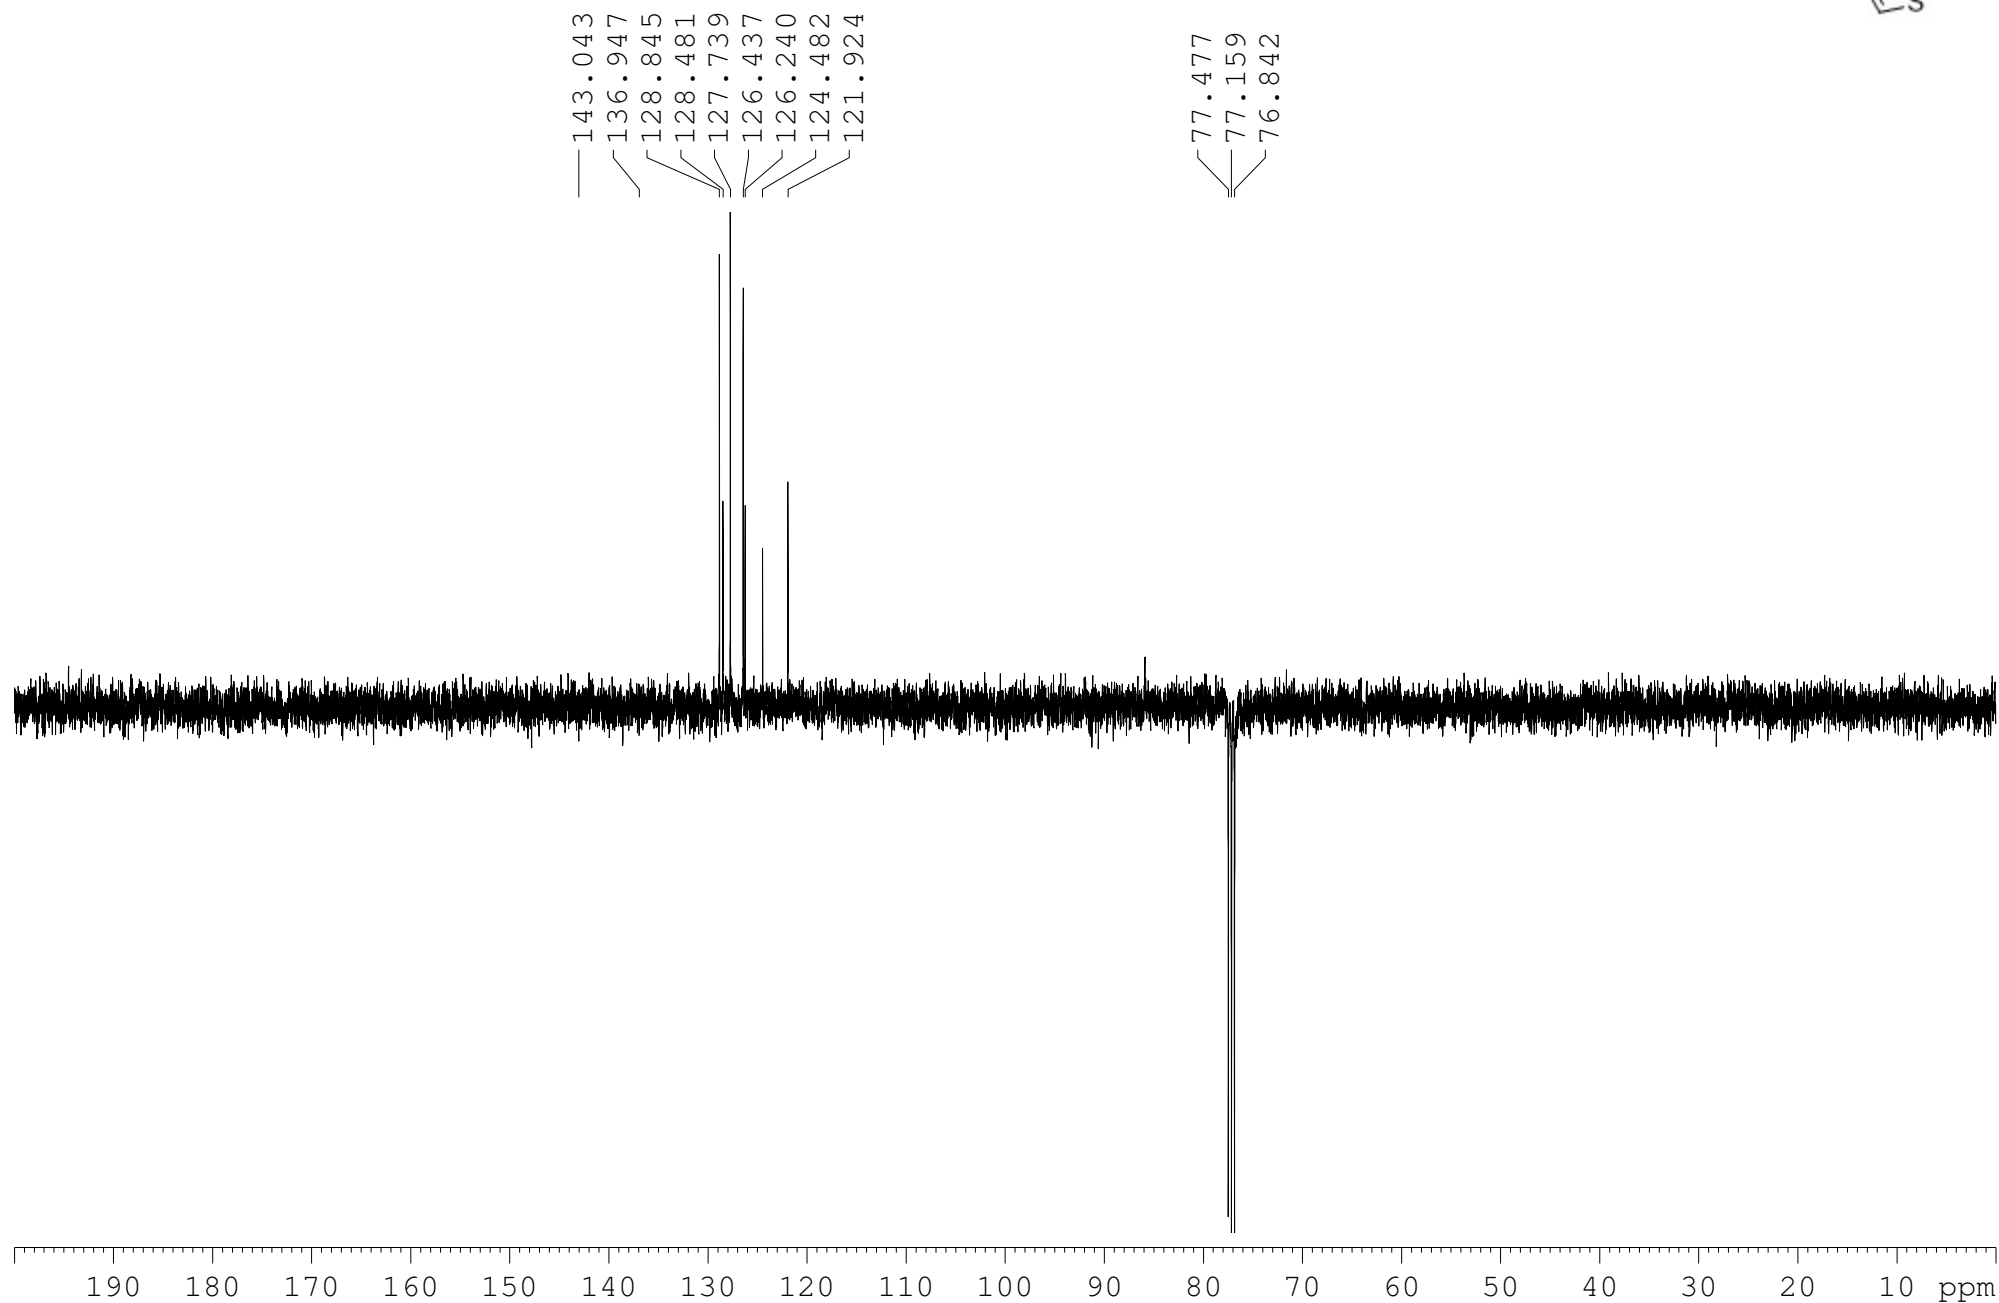

2-(4-chlorophenylethenyl-E)-thiophene (**10eb**)

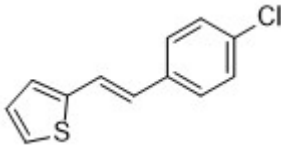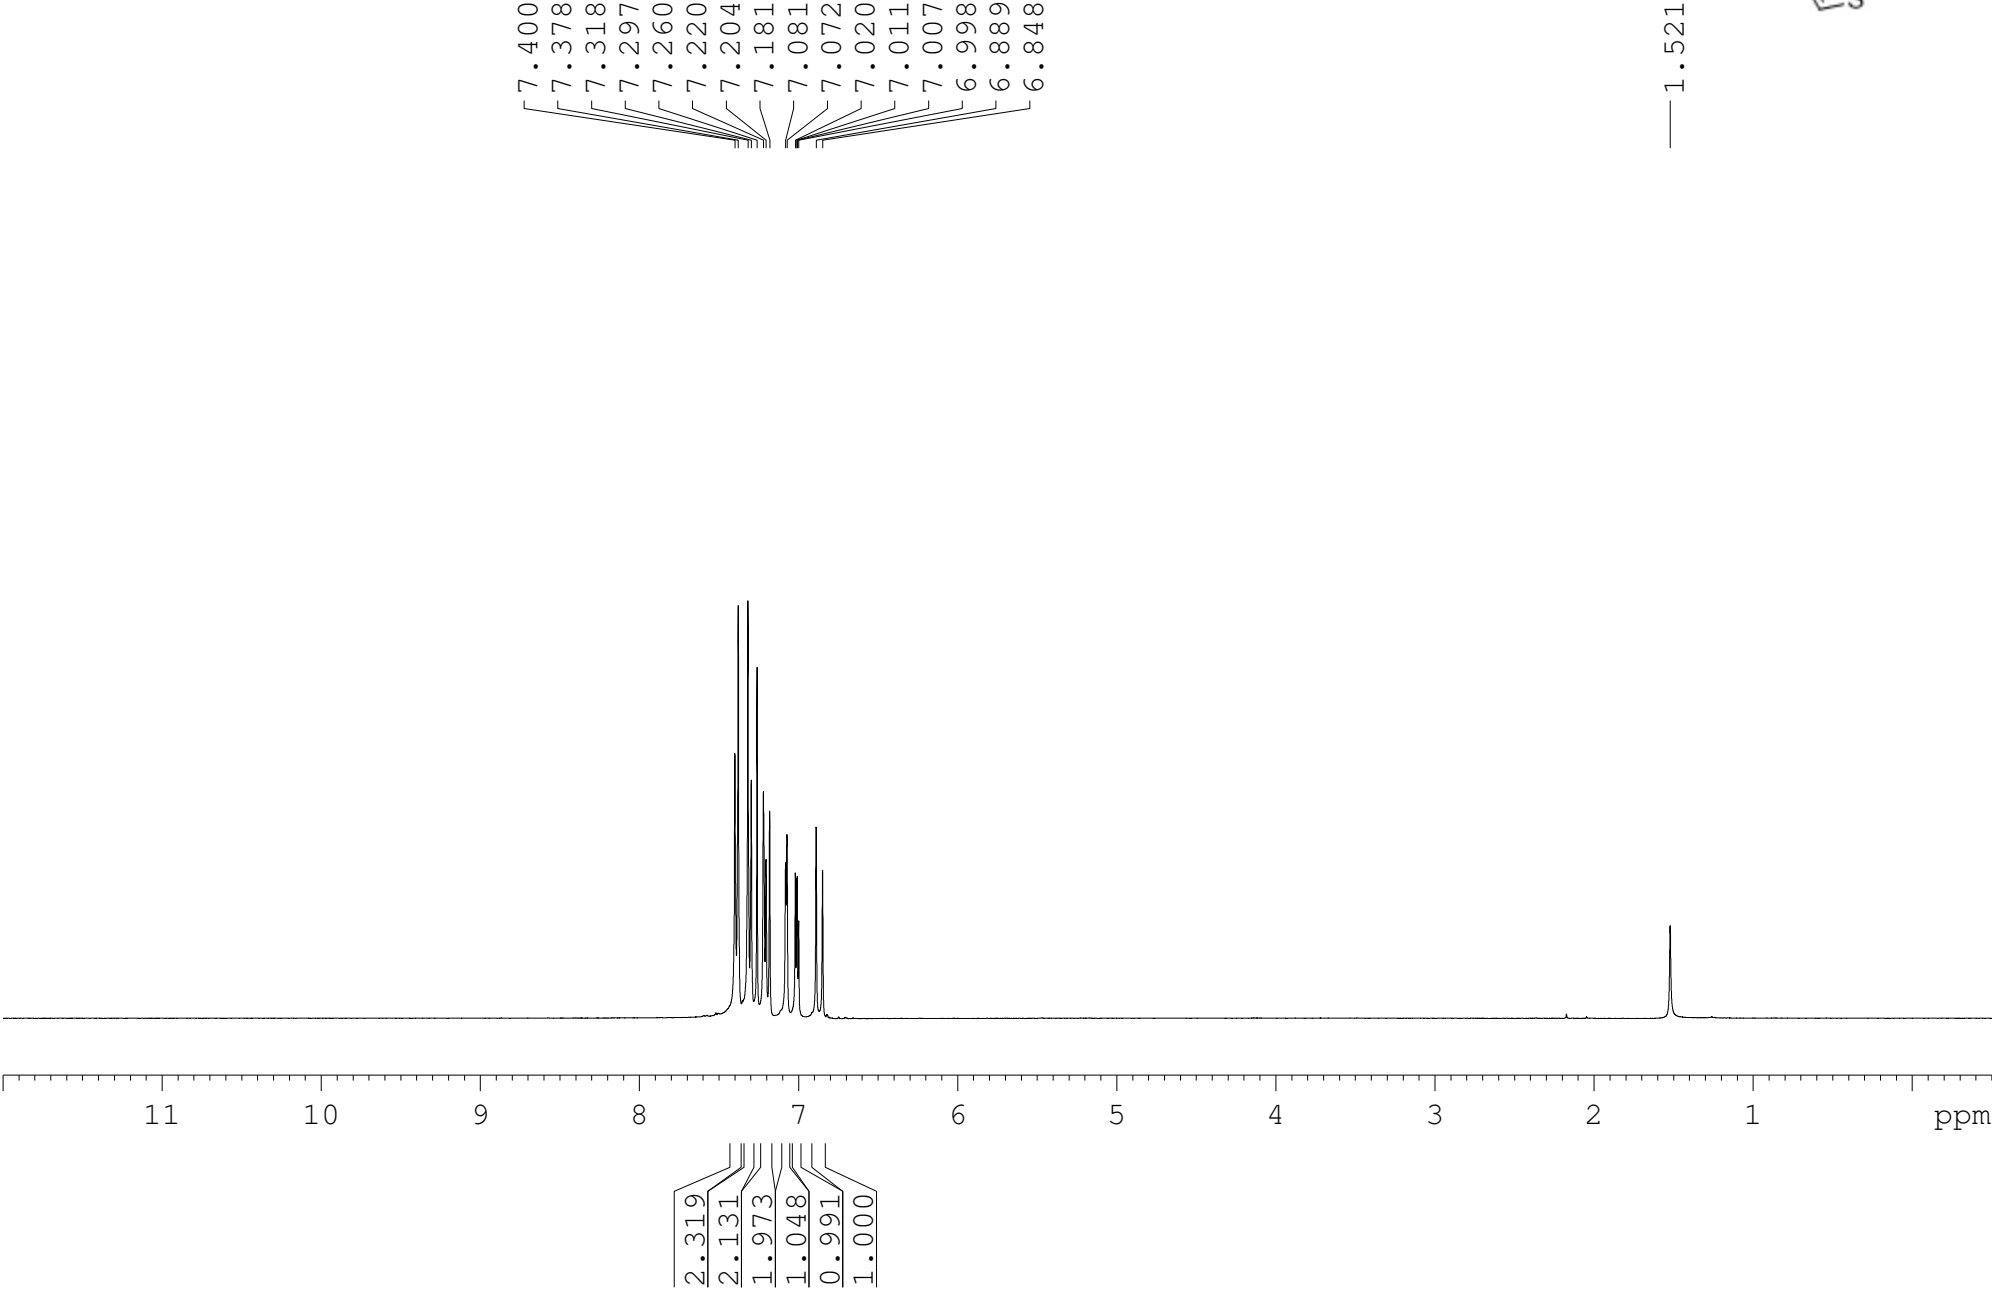

2-(4-chlorophenylethenyl-E)-thiophene (**10eb**)

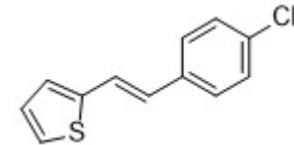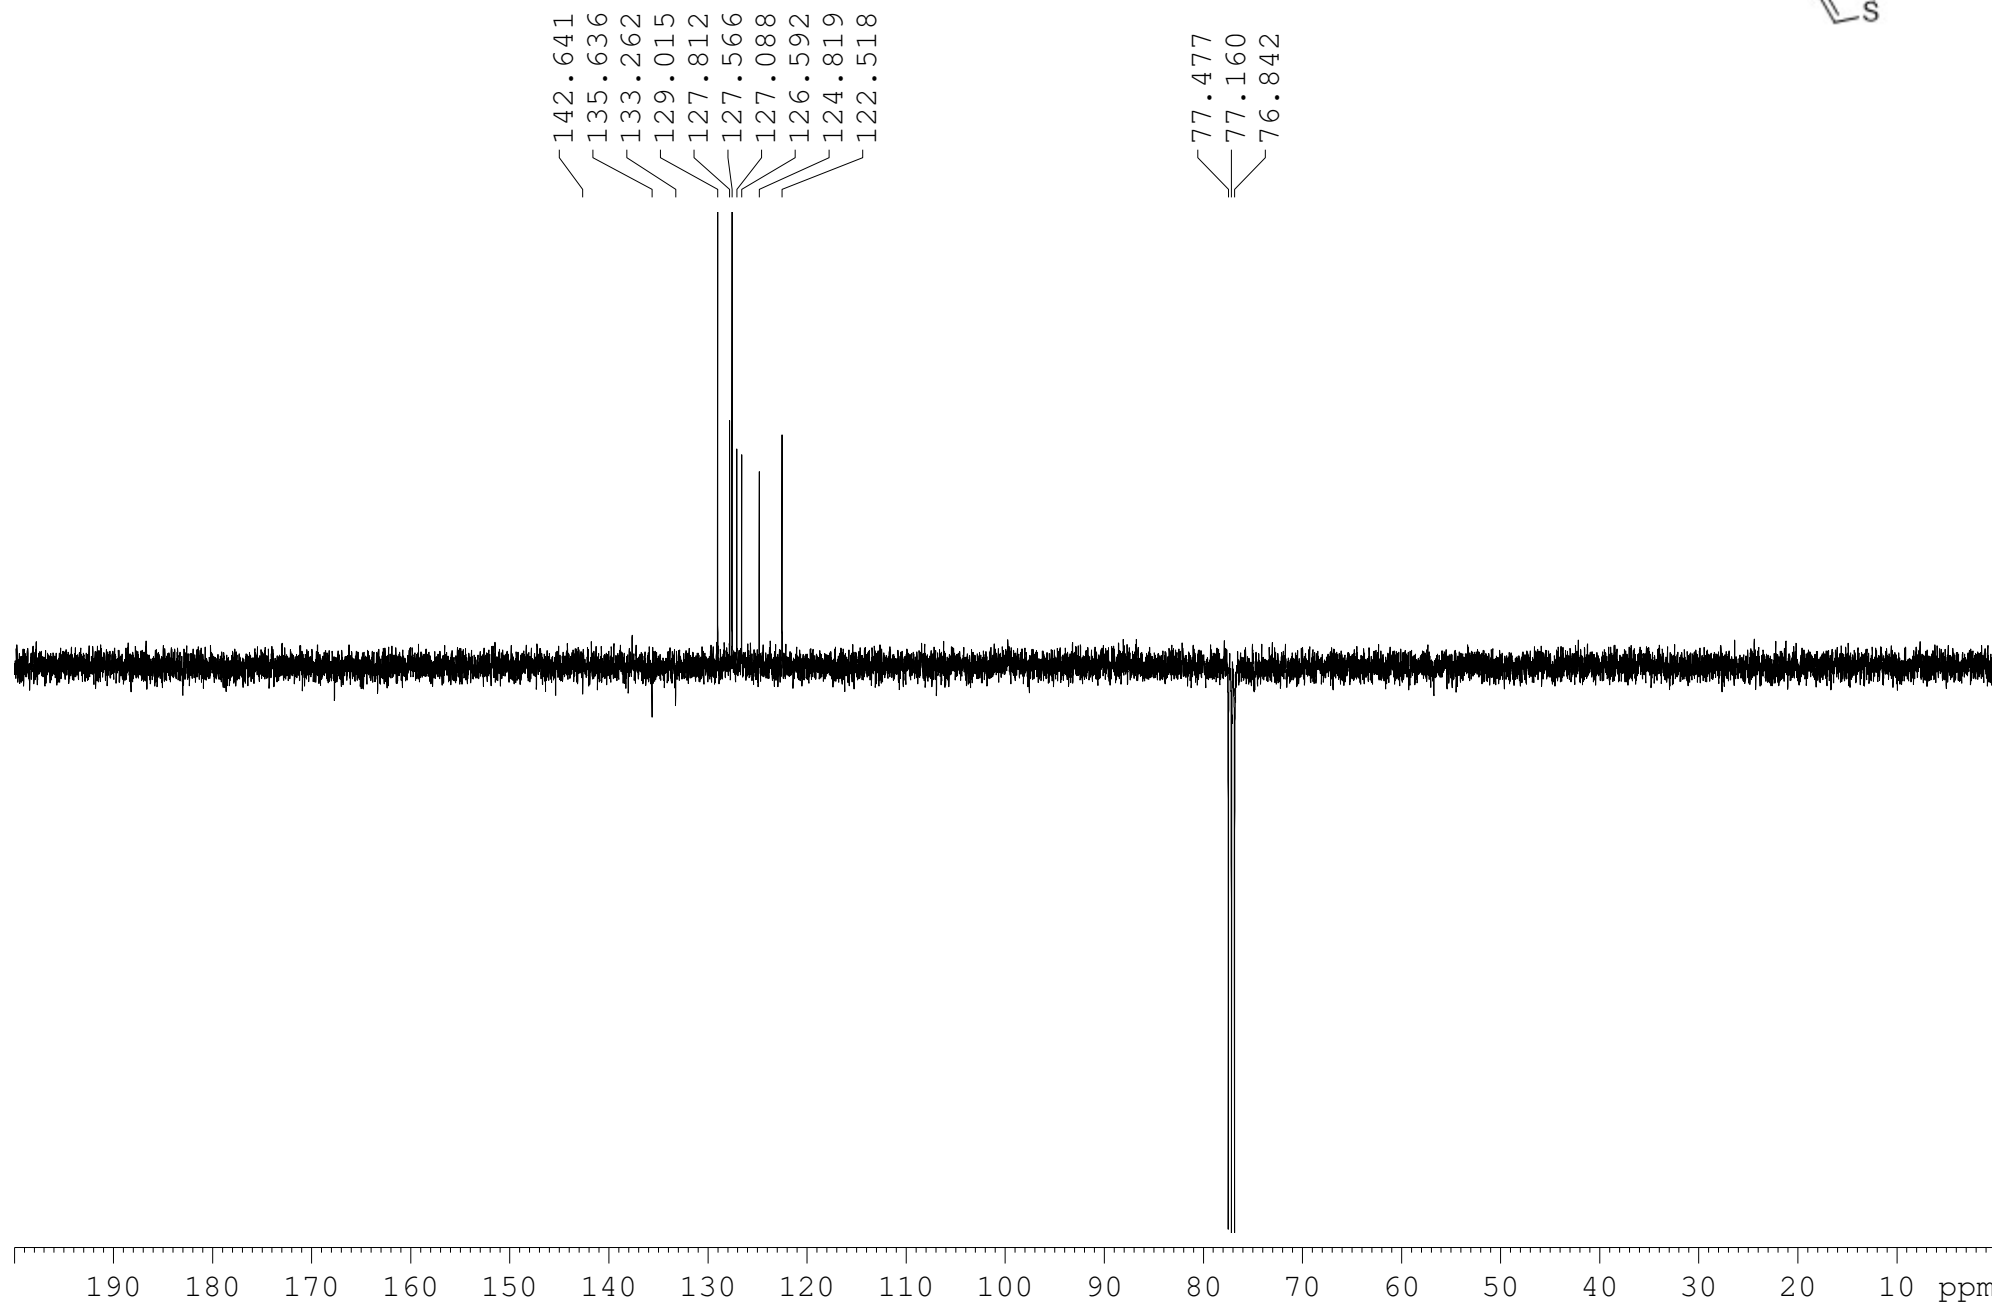

Supplement: c8gc03228a1.pdf [file c8gc03228a1.pdf]
